# Supplementary material for: Off-season RSV epidemics in Australia after easing of COVID-19 restrictions
Source: PubMed Central journal article supplement (PMC9130497; doi:10.1038/s41467-022-30485-3), 2022-05-24
Supplement: 41467_2022_30485_MOESM1_ESM.pdf [file 41467_2022_30485_MOESM1_ESM.pdf]

# Off-season RSV epidemics in Australia after easing of COVID-19 restrictions

John-Sebastian Eden<sup>1,2\*</sup>, Chisha Sikazwe<sup>3,4\*</sup>, Ruopeng Xie<sup>5,6\*</sup>, Yi-Mo Deng<sup>7,8</sup>, Sheena G. Sullivan<sup>7,9</sup>, Alice Michie<sup>4</sup>, Avram Levy<sup>3</sup>, Elena Cutmore<sup>1,2</sup>, Christopher C Blyth<sup>3,10-12</sup>, Philip N Britton<sup>2,13</sup>, Nigel Crawford<sup>14-16</sup>, Xiaomin Dong<sup>7,8</sup>, Dominic E. Dwyer<sup>2,17</sup>, Kimberly M. Edwards<sup>5,6</sup>, Bethany A. Horsburgh<sup>1,2</sup>, David Foley<sup>3</sup>, Karina Kennedy<sup>18</sup>, Cara Minney-Smith<sup>3</sup>, David Speers<sup>3,10</sup>, Rachel L. Tulloch<sup>1,2</sup>, Edward C. Holmes<sup>2</sup>, Vijaykrishna Dhanasekaran<sup>5,6#</sup>, David W. Smith<sup>3,10#</sup>, Jen Kok<sup>17#</sup> & Ian G. Barr<sup>7,8#</sup> and the Australian RSV study group<sup>^</sup>

1. Centre for Virus Research, Westmead Institute for Medical Research, Westmead, NSW 2145, Australia
2. Sydney Institute for Infectious Diseases, Sydney Medical School, The University of Sydney, Sydney, NSW 2006, Australia
3. PathWest Laboratory Medicine WA, Department of Microbiology, Nedlands, WA 6009, Australia
4. School of Biomedical Sciences, The University of Western Australia, Crawley, WA 6009, Australia
5. School of Public Health, LKS Faculty of Medicine, The University of Hong Kong, Hong Kong, China
6. HKU-Pasteur Research Pole, School of Public Health, LKS Faculty of Medicine, The University of Hong Kong, Hong Kong, China
7. WHO Collaborating Centre for Reference and Research on Influenza, Royal Melbourne Hospital, at the Peter Doherty Institute for Infection and Immunity, Melbourne, Victoria 3000, Australia
8. Department of Microbiology and Immunology, University of Melbourne, at the Peter Doherty Institute for Infection and Immunity, Melbourne, Victoria 3000, Australia
9. Department of Infectious Diseases, University of Melbourne, at the Peter Doherty Institute for Infection and Immunity, Melbourne, Victoria 3000, Australia
10. School of Medicine, The University of Western Australia, Crawley, WA 6009, Australia
11. Department of Infectious Diseases, Perth Children's Hospital, Nedlands, WA 6009, Australia
12. Wesfarmers Centre of Vaccines and Infectious Diseases, Telethon Kids Institute, Nedlands, WA 6009, Australia
13. Departments of Infectious Diseases and Microbiology, The Children's Hospital at Westmead, Westmead, NSW 2145, Australia
14. Murdoch Children's Research Institute, Melbourne, Victoria 3000, Australia
15. Department of Paediatrics, University of Melbourne & Royal Children's Hospital, Melbourne, Victoria 3000, Australia
16. Immunisation Service, Royal Children's Hospital, Melbourne, Victoria 3000, Australia
17. NSW Health Pathology - Institute for Clinical Pathology and Medical Research, Westmead Hospital, Westmead, NSW 2145, Australia
18. Departments of Clinical Microbiology and Infectious Diseases, Canberra Hospital, Garran, ACT 2605, Australia

## Supplementary information

- 39 \*These authors contributed equally
- 40 #These authors jointly supervised this work
- 41 ^A list of authors and their affiliations appears at the end of the main manuscript

## Supplementary information

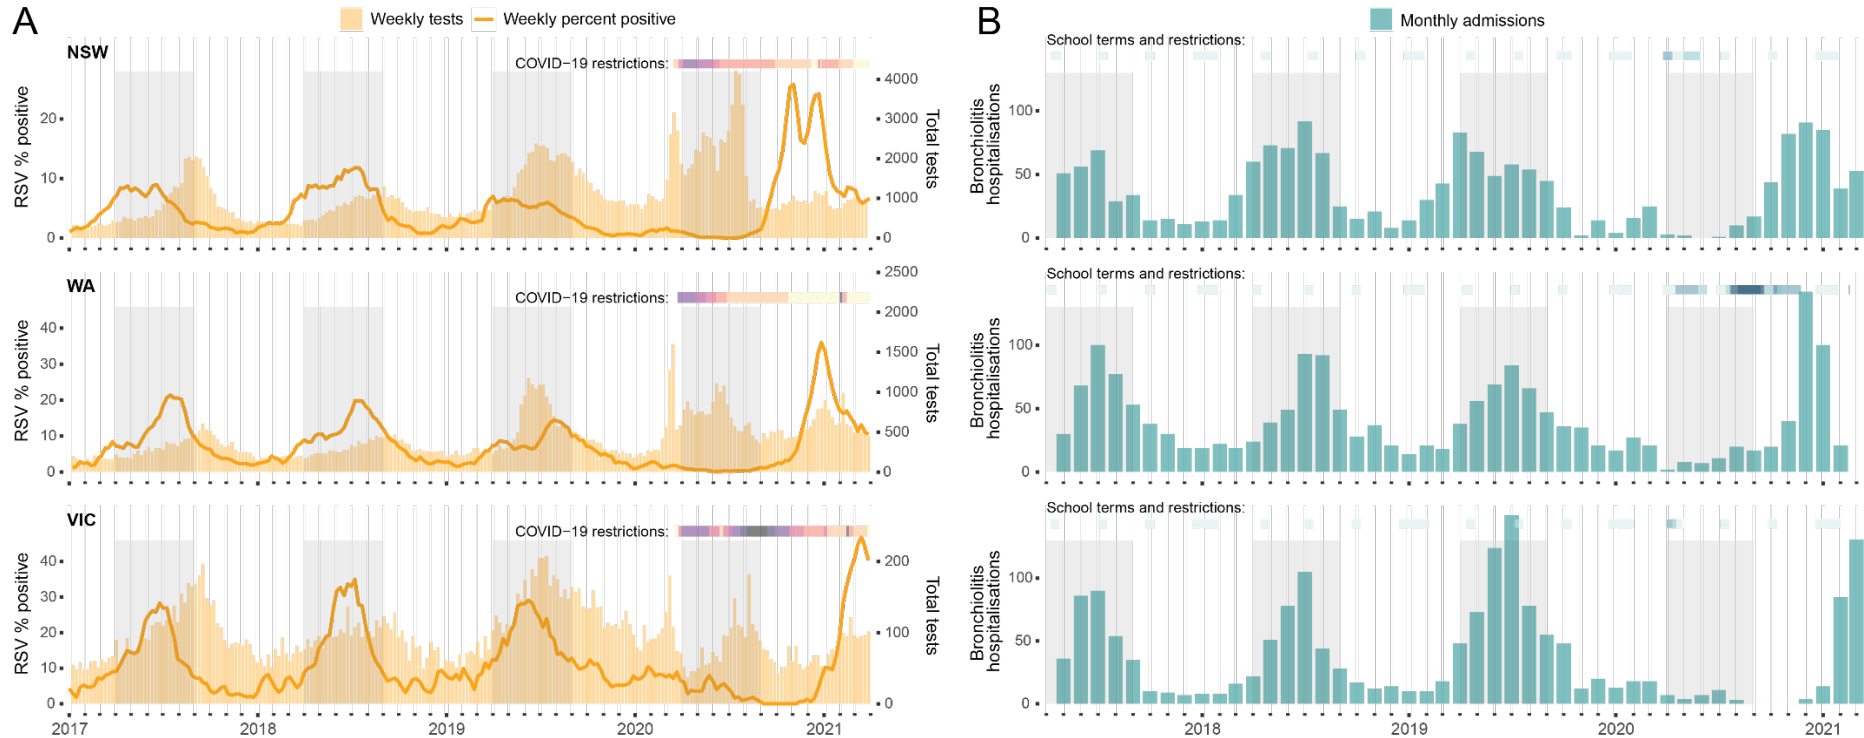

42

43

44

45

46

47

**Supplementary Figure 1. Time series showing laboratory testing data (A) and RSV bronchiolitis admissions (B) for three Australian states – New South Wales (NSW), Western Australia (WA) and Victoria (VIC).** Bars at the top of each state indicate COVID-19 restrictions or school holidays/restrictions for each state. For pandemic restrictions, darker colours indicate more severe restrictions. For schools, shading indicates school holiday periods, which darker shading indicates the period during which schools were closed or parents were encouraged to keep their children home. Grey shaded regions indicate the period 1st April to 1st September, which coincides with usual activity of RSV and other respiratory viruses.

Supplementary information

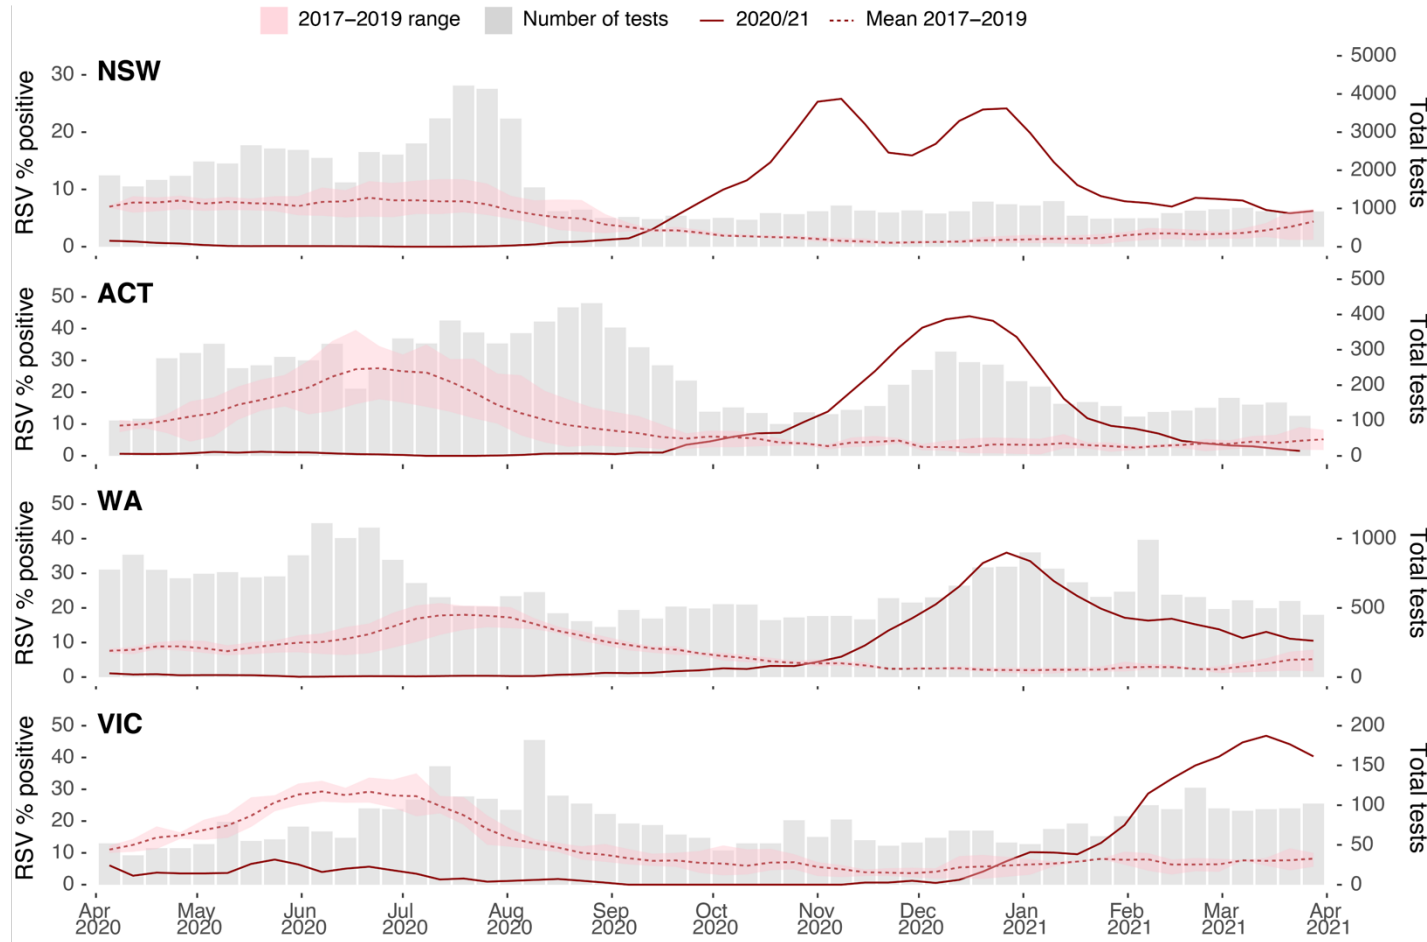

48

49

**Supplementary Figure 2. Laboratory RSV detections in Australian states and territories – New South Wales (NSW), Western Australia (WA),**

50

**Victoria (VIC) and Australian Capital Territory (ACT). Laboratory testing for RSV in 2020 as weekly percent positive (red line, left y-axis) and as total**

51

number of tests performed (grey bars, right y-axis). In each panel, the dashed red line represents mean monthly RSV percent positive over the three previous

52

seasons, and corresponding red shading represents the range (minimum and maximum weekly percent positive).

53

Supplementary information

A. Western Australia

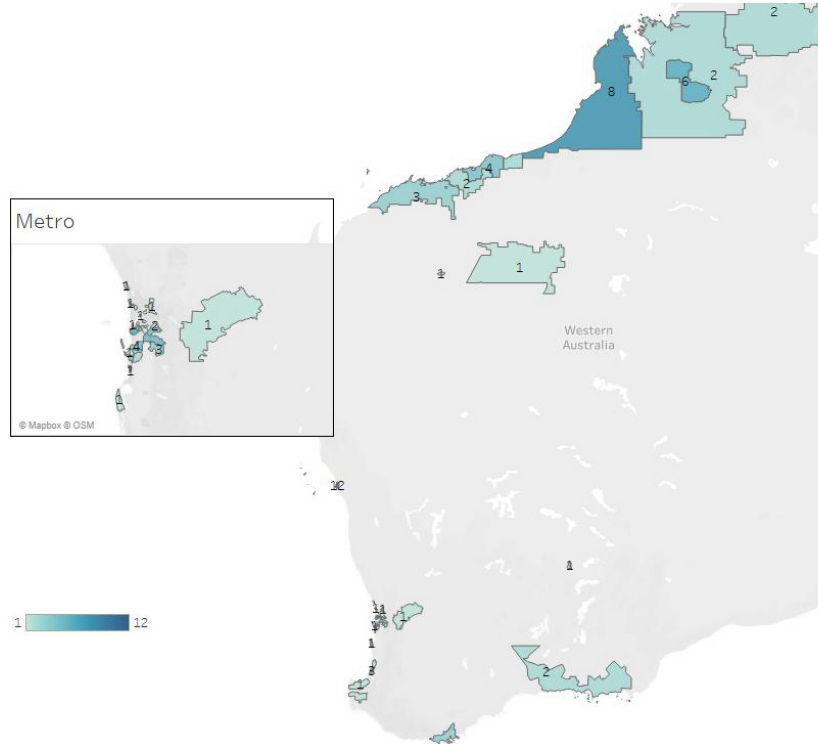

B. New South Wales & ACT

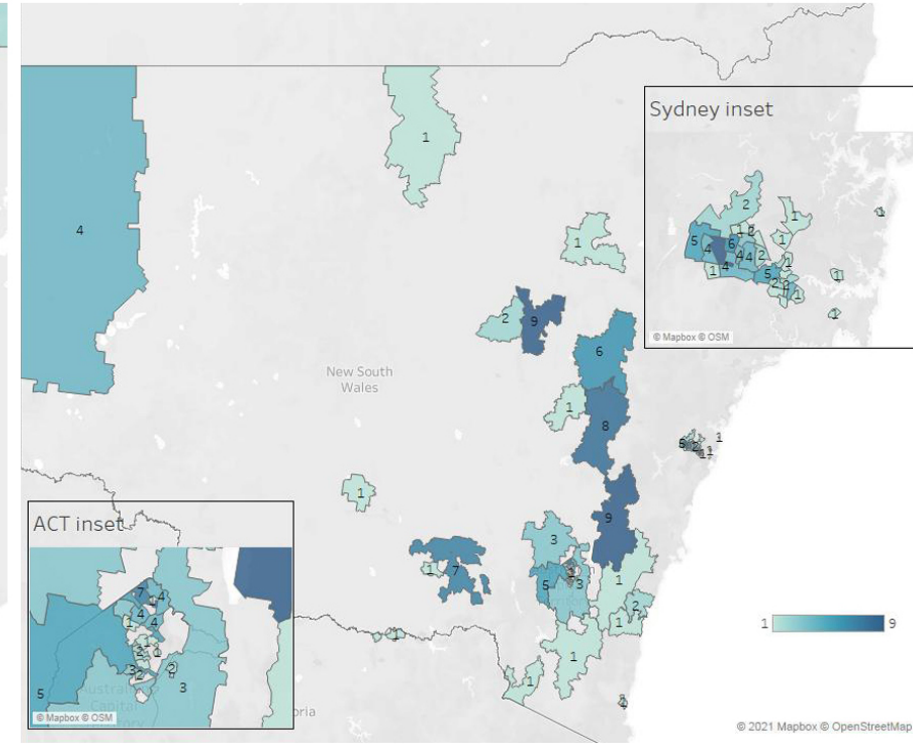

54  
55 **Supplementary Figure 3. Geographic distribution of RSV genome sequences in Western Australia (WA) and New South Wales (NSW) and**  
56 **Australian Capital Territory (ACT), Australia.** The number of RSV genomes and their sampling location have been mapped according to postcode and  
57 coloured according to the keys provided for each state and territory. Population dense metropolitan areas, including Perth in WA, Sydney in NSW, and  
58 Canberra in the ACT are displayed as focused insets. OpenStreetMap® is open data and licensed under the Open Data Commons Open Database  
59 License (ODbL).

Supplementary information

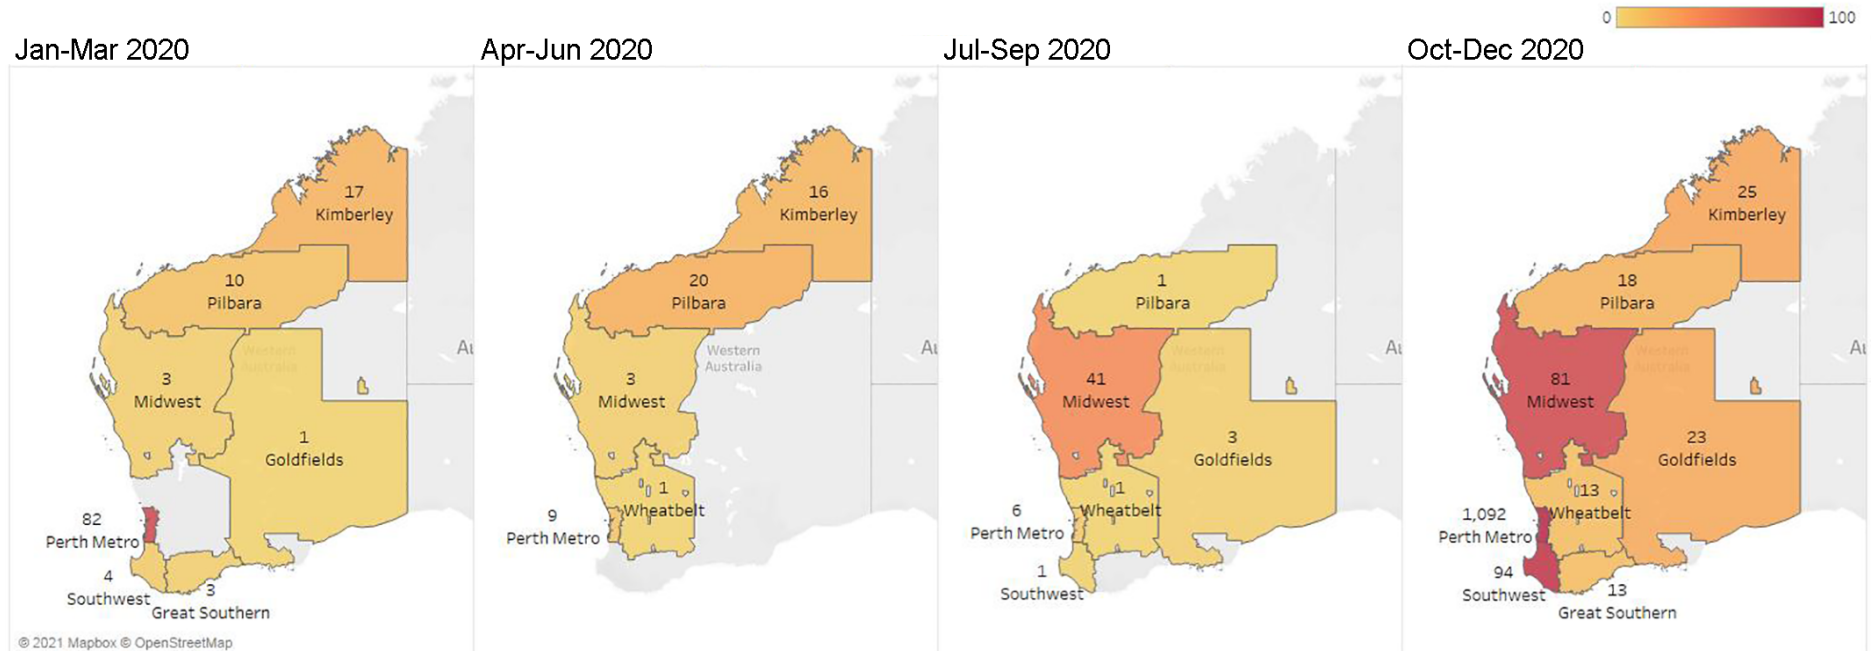

60  
61 **Supplementary Figure 4. Quarterly stratified sampling of total number of PCR positive RSV cases that underwent testing at PathWest Laboratory**  
62 **Medicine, Western Australia during 2020.** Sampling locations were defined by region and coloured according to the total number of RSV cases within each  
63 region per quarter, with the darker colours being representative of increased case numbers. OpenStreetMap® is open data and licensed under the  
64 Open Data Commons Open Database License (ODbL).

65

**A. Genome**

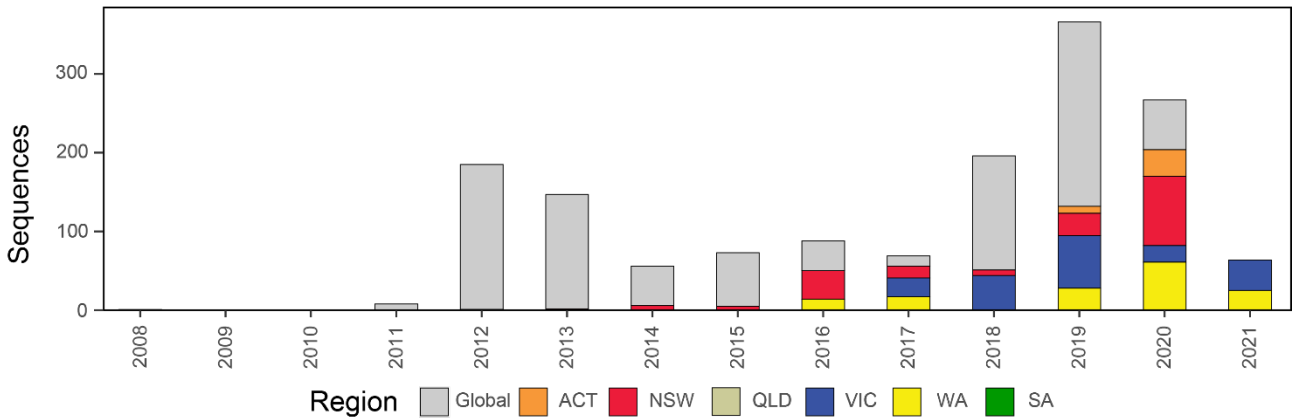

**B. Glycoprotein**

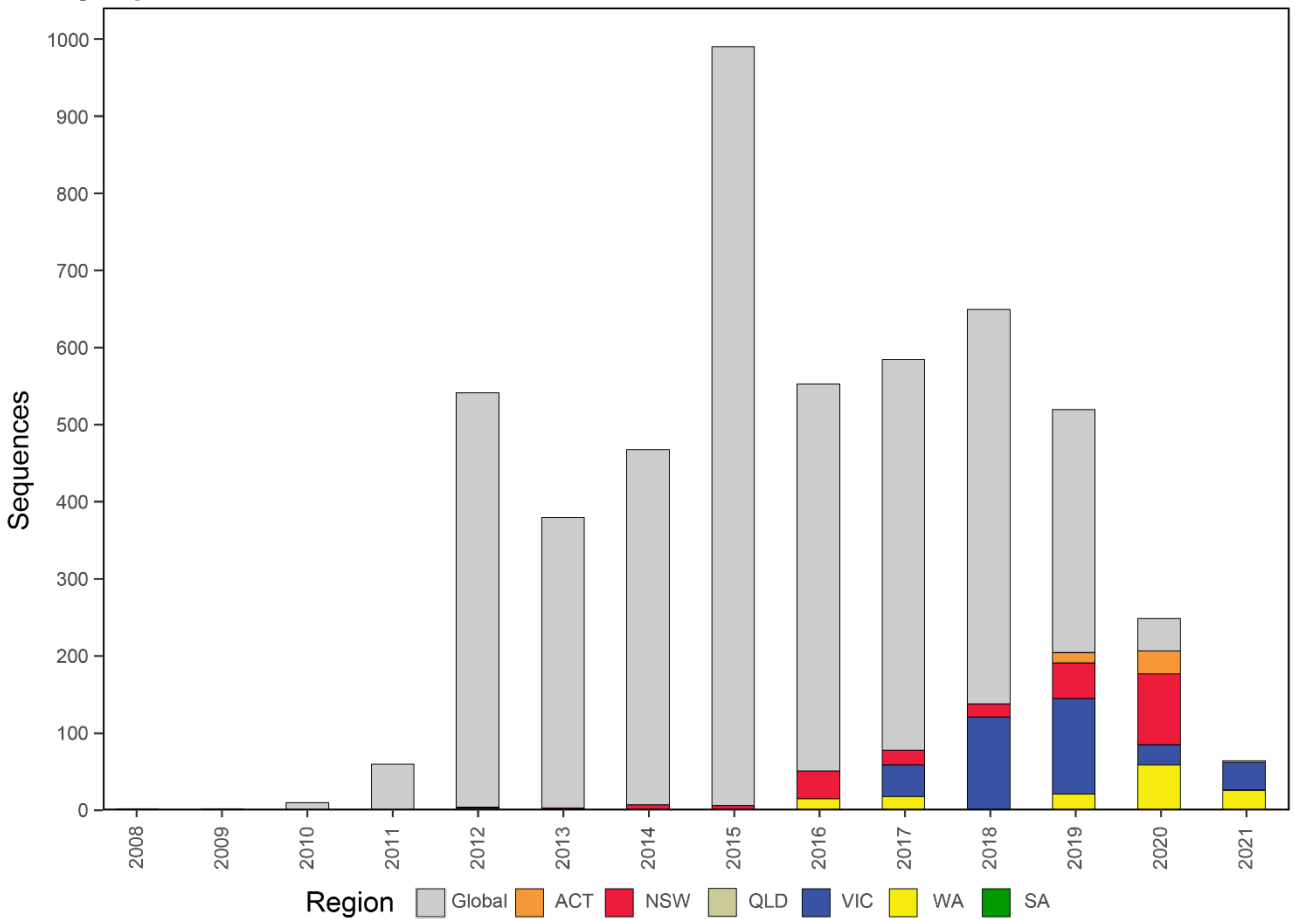

66

67

**Supplementary Figure 5. Geographic and temporal sampling distributions for genomic analysis.**

68

These plots show the number of sequences (y-axis) by collection year (x-axis) for the genome (panel A) and

69

glycoprotein (panel B) analysis presented in Figures 2 & 3, respectively. Australian states - New South

70

Wales (NSW), Australia Capital Territory (ACT), Western Australia (WA) and Victoria (VIC), South Australia

71

(SA) and Queensland (QLD) - and globally-derived sequences are coloured according to the keys provided.

## Supplementary information

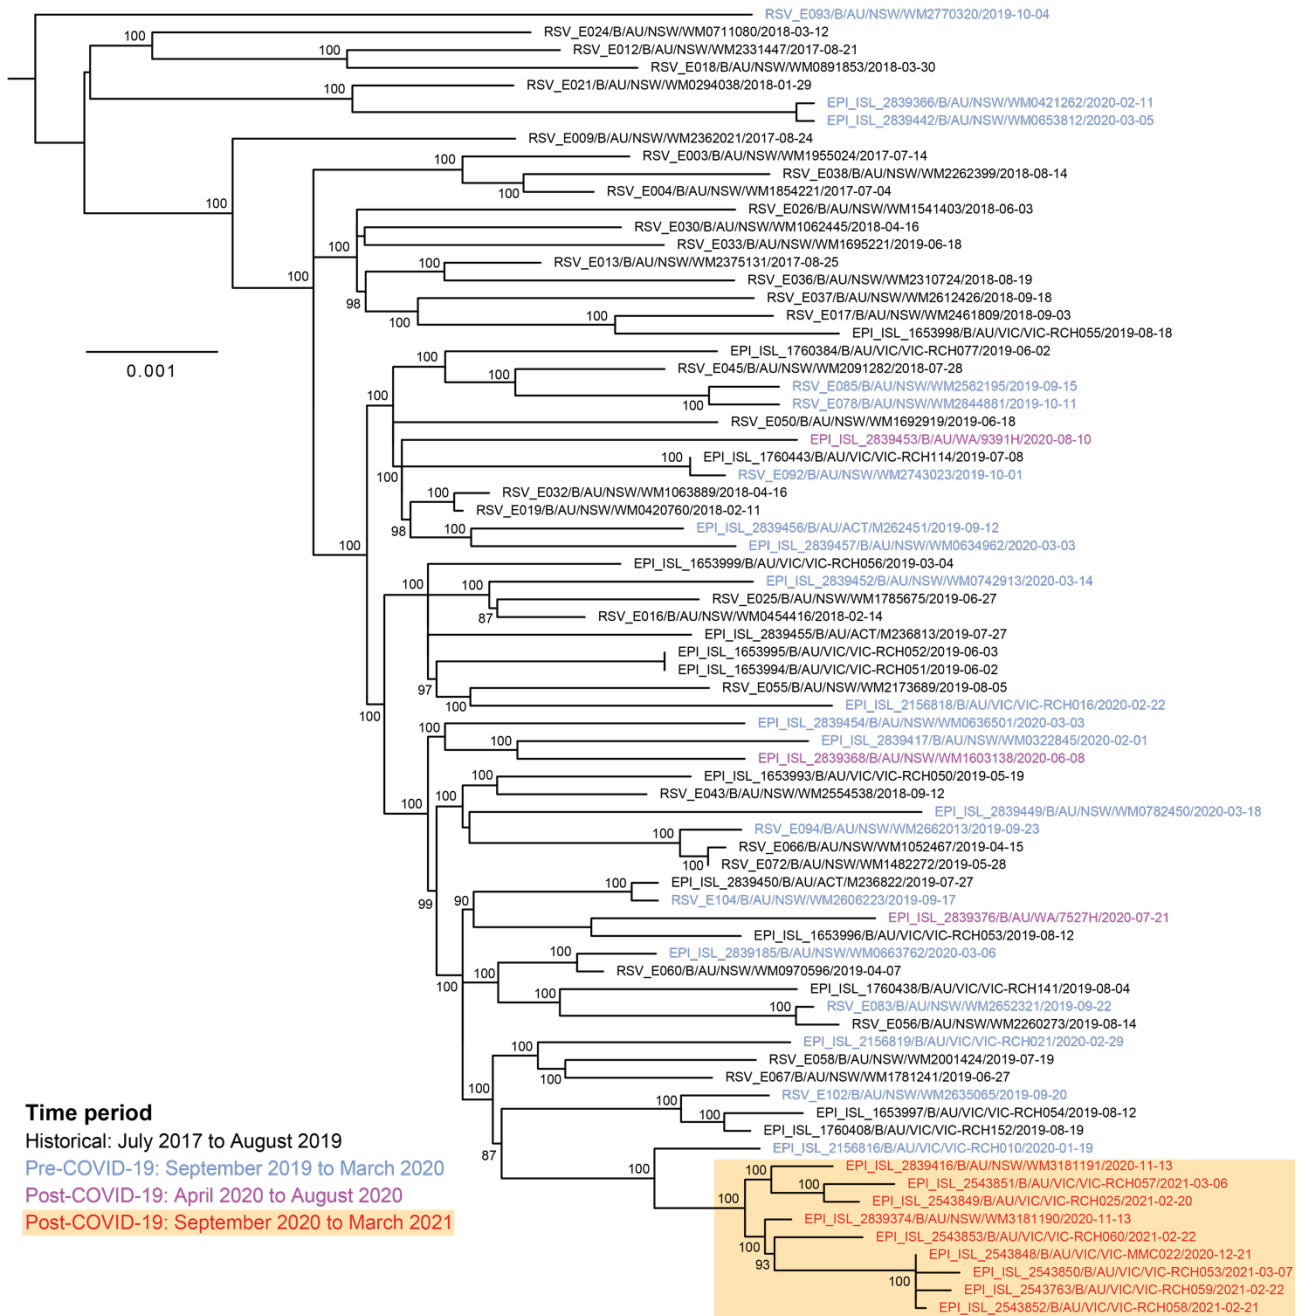

**Supplementary Figure 6. Phylogenetic analysis of RSV-B diversity in Australia since mid-2017.** RSV-B genome sequences generated in this study (n=74) were aligned and analysed phylogenetically using PhyML. The sequence labels show the accession, subtype, location, strain and collection date, and have been coloured according to the period they were collected as per the key provided. Values at nodes indicate bootstrap support values >70%. Branches are proportional to the number of nucleotide substitutions per site. The clade highlighted at the bottom represents a monophyletic lineage that emerged during the outbreak period of late 2020 to early 2021.



Supplementary information

80

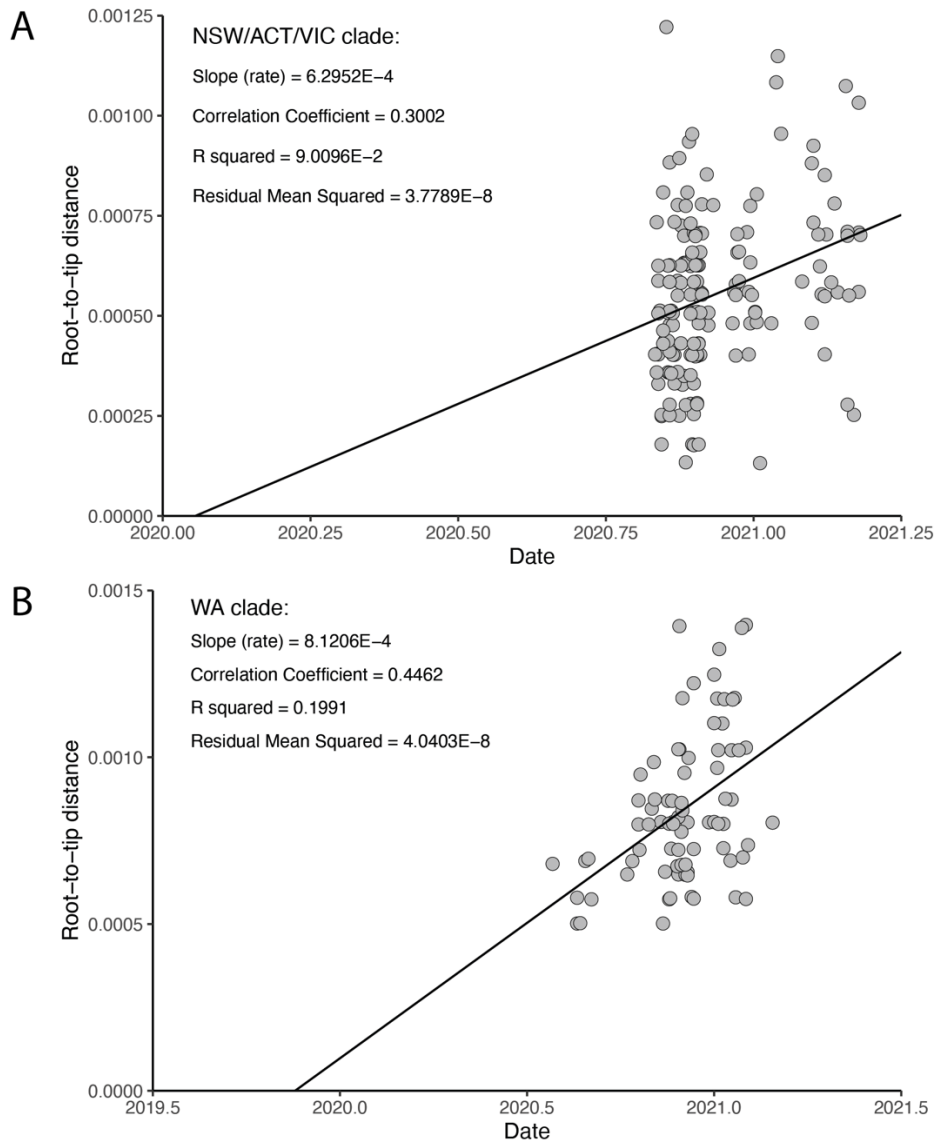

81

82

83

84

85

**Supplementary Figure 7. Temporal signal in NSW/ACT/VIC and WA clades.** Maximum likelihood phylogenies were prepared for each clade and root-to-tip distance (y-axis) was compared against sample collection date (x-axis) by linear-regression with each point representing one sequence in the phylogeny. NSW = New South Wales, ACT = Australian Capital Territory, VIC = Victoria and WA = Western Australia.

## Supplementary information

86 **Supplementary Table 1. Accession numbers for sequences generated in this study**

| GenBank  | GISAID          | Virus                         | Location* | Collection |
|----------|-----------------|-------------------------------|-----------|------------|
| OM857140 | EPI_ISL_2835616 | hRSV/A/Australia/1514/2021    | WA        | 2021-01-18 |
| OM857141 | EPI_ISL_2839389 | hRSV/A/Australia/4005237/2020 | WA        | 2020-10-13 |
| OM857142 | EPI_ISL_2839387 | hRSV/A/Australia/1003657/2020 | WA        | 2020-11-01 |
| OM857143 | EPI_ISL_2839381 | hRSV/A/Australia/2002105/2020 | WA        | 2020-11-22 |
| OM857144 | EPI_ISL_2839390 | hRSV/A/Australia/6009368/2020 | WA        | 2020-11-26 |
| OM857145 | EPI_ISL_2839391 | hRSV/A/Australia/7007045/2020 | WA        | 2020-11-27 |
| OM857146 | EPI_ISL_2839383 | hRSV/A/Australia/3002009/2020 | WA        | 2020-12-12 |
| OM857147 | EPI_ISL_2839388 | hRSV/A/Australia/3002022/2020 | WA        | 2020-12-12 |
| OM857148 | EPI_ISL_2839392 | hRSV/A/Australia/9002215/2020 | WA        | 2020-11-19 |
| OM857149 | EPI_ISL_2839378 | hRSV/A/Australia/5005469/2021 | WA        | 2021-01-05 |
| OM857150 | EPI_ISL_2839398 | hRSV/A/Australia/3073/2020    | WA        | 2020-11-20 |
| OM857151 | EPI_ISL_2839405 | hRSV/A/Australia/4009301/2020 | WA        | 2020-12-04 |
| OM857152 | EPI_ISL_2839406 | hRSV/A/Australia/6003147/2020 | WA        | 2020-12-06 |
| OM857153 | EPI_ISL_2839410 | hRSV/A/Australia/8010547/2020 | WA        | 2020-11-18 |
| OM857154 | EPI_ISL_2839443 | hRSV/A/Australia/3904/2020    | WA        | 2020-12-10 |
| OM857155 | EPI_ISL_2839446 | hRSV/A/Australia/4004352/2020 | WA        | 2020-11-14 |
| OM857156 | EPI_ISL_2839447 | hRSV/A/Australia/6002331/2020 | WA        | 2020-12-06 |
| OM857157 | EPI_ISL_2839441 | hRSV/A/Australia/6003904/2020 | WA        | 2020-12-06 |
| OM857158 | EPI_ISL_2839412 | hRSV/A/Australia/7006882/2020 | WA        | 2020-11-27 |
| OM857159 | EPI_ISL_2839414 | hRSV/A/Australia/8001840/2020 | WA        | 2020-10-08 |
| OM857160 | EPI_ISL_2839440 | hRSV/A/Australia/4011388/2020 | WA        | 2020-11-04 |
| OM857161 | EPI_ISL_2839430 | hRSV/A/Australia/3001519/2020 | WA        | 2020-11-03 |
| OM857162 | EPI_ISL_2839448 | hRSV/A/Australia/9005740/2020 | WA        | 2020-10-29 |
| OM857163 | EPI_ISL_2839432 | hRSV/A/Australia/5584/2020    | WA        | 2020-11-30 |
| OM857164 | EPI_ISL_2839418 | hRSV/A/Australia/1003117/2020 | WA        | 2020-11-10 |
| OM857165 | EPI_ISL_2839179 | hRSV/A/Australia/1006644/2020 | WA        | 2020-11-21 |
| OM857166 | EPI_ISL_2839431 | hRSV/A/Australia/2002690/2020 | WA        | 2020-11-22 |
| OM857167 | EPI_ISL_2839399 | hRSV/A/Australia/3471/2020    | WA        | 2020-10-20 |
| OM857168 | EPI_ISL_2839409 | hRSV/A/Australia/7003912/2020 | WA        | 2020-11-17 |
| OM857169 | EPI_ISL_2839415 | hRSV/A/Australia/8002008/2020 | WA        | 2020-11-27 |
| OM857170 | EPI_ISL_2839407 | hRSV/A/Australia/9002436/2020 | WA        | 2020-11-28 |
| OM857171 | EPI_ISL_2839439 | hRSV/A/Australia/3012220/2020 | WA        | 2020-12-03 |
| OM857172 | EPI_ISL_2839364 | hRSV/A/Australia/9005762/2020 | WA        | 2020-10-19 |
| OM857173 | EPI_ISL_2839172 | hRSV/A/Australia/9005783/2020 | WA        | 2020-10-19 |
| OM857174 | EPI_ISL_2839438 | hRSV/A/Australia/1011044/2020 | WA        | 2020-12-01 |
| OM857175 | EPI_ISL_2839444 | hRSV/A/Australia/1002541/2021 | WA        | 2021-01-01 |
| OM857176 | EPI_ISL_2543773 | hRSV/A/Australia/MMC045/2020  | VIC       | 2020-12-27 |
| OM857177 | EPI_ISL_2543777 | hRSV/A/Australia/MMC055/2021  | VIC       | 2021-01-10 |
| OM857178 | EPI_ISL_2839386 | hRSV/A/Australia/2051/2021    | WA        | 2021-01-29 |
| OM857179 | EPI_ISL_2839183 | hRSV/A/Australia/6492G/2020   | WA        | 2020-08-20 |
| OM857180 | EPI_ISL_2839413 | hRSV/A/Australia/7494P/2020   | WA        | 2020-09-03 |
| OM857181 | EPI_ISL_2839433 | hRSV/A/Australia/8003496/2021 | WA        | 2021-01-17 |

### Supplementary information

|          |                 |                                 |     |            |
|----------|-----------------|---------------------------------|-----|------------|
| OM857182 | EPI_ISL_2839385 | hRSV/A/Australia/7680J/2020     | WA  | 2020-08-23 |
| OM857183 | EPI_ISL_2839195 | hRSV/A/Australia/8005369/2021   | WA  | 2021-01-18 |
| OM857184 | EPI_ISL_2839429 | hRSV/A/Australia/5003133/2021   | WA  | 2021-01-04 |
| OM857185 | EPI_ISL_2839423 | hRSV/A/Australia/3004170/2021   | WA  | 2021-01-21 |
| OM857186 | EPI_ISL_2839199 | hRSV/A/Australia/1643/2021      | WA  | 2021-01-10 |
| OM857187 | EPI_ISL_2839170 | hRSV/A/Australia/6545C/2020     | WA  | 2020-08-20 |
| OM857188 | EPI_ISL_2839445 | hRSV/A/Australia/3002027/2021   | WA  | 2021-01-22 |
| OM857189 | EPI_ISL_2839411 | hRSV/A/Australia/1008347/2021   | WA  | 2021-02-01 |
| OM857190 | EPI_ISL_2839171 | hRSV/A/Australia/3010918/2021   | WA  | 2021-02-03 |
| OM857191 | EPI_ISL_2839402 | hRSV/A/Australia/3004/2021      | WA  | 2021-01-09 |
| OM857192 | EPI_ISL_2839408 | hRSV/A/Australia/2001479/2020   | WA  | 2020-10-21 |
| OM857193 | EPI_ISL_2839400 | hRSV/A/Australia/3002650/2021   | WA  | 2021-01-01 |
| OM857194 | EPI_ISL_2839404 | hRSV/A/Australia/3002687/2021   | WA  | 2021-01-01 |
| OM857195 | EPI_ISL_2839403 | hRSV/A/Australia/1010209/2021   | WA  | 2021-01-11 |
| OM857196 | EPI_ISL_2839401 | hRSV/A/Australia/5009934/2021   | WA  | 2021-01-04 |
| OM857197 | EPI_ISL_2839397 | hRSV/A/Australia/9009560/2021   | WA  | 2021-01-19 |
| OM857198 | EPI_ISL_2839379 | hRSV/A/Australia/2003588/2020   | WA  | 2020-12-12 |
| OM857199 | EPI_ISL_2839384 | hRSV/A/Australia/8001314/2020   | WA  | 2020-11-27 |
| OM857200 | EPI_ISL_2839372 | hRSV/A/Australia/8006635/2020   | WA  | 2020-11-28 |
| OM857201 | EPI_ISL_2839176 | hRSV/A/Australia/6002591/2021   | WA  | 2021-01-25 |
| OM857202 | EPI_ISL_2839181 | hRSV/A/Australia/5516M/2020     | WA  | 2020-07-27 |
| OM857203 | EPI_ISL_2839182 | hRSV/A/Australia/7199H/2020     | WA  | 2020-08-31 |
| OM857204 | EPI_ISL_2839184 | hRSV/A/Australia/1007437/2021   | WA  | 2021-02-01 |
| OM857205 | EPI_ISL_2839177 | hRSV/A/Australia/6002451/2021   | WA  | 2021-01-05 |
| OM857206 | EPI_ISL_2839174 | hRSV/A/Australia/3160/2020      | WA  | 2020-11-30 |
| OM857207 | EPI_ISL_2839194 | hRSV/A/Australia/4010993/2020   | WA  | 2020-12-04 |
| OM857208 | EPI_ISL_2839192 | hRSV/A/Australia/7006894/2020   | WA  | 2020-12-07 |
| OM857209 | EPI_ISL_2839175 | hRSV/A/Australia/6992X/2020     | WA  | 2020-08-28 |
| OM857210 | EPI_ISL_2839370 | hRSV/A/Australia/1004203/2020   | WA  | 2020-11-30 |
| OM857211 | EPI_ISL_2839421 | hRSV/A/Australia/8006798/2021   | WA  | 2021-01-28 |
| OM857212 | EPI_ISL_2839173 | hRSV/A/Australia/6012043/2021   | WA  | 2021-01-06 |
| OM857213 | EPI_ISL_2839300 | hRSV/A/Australia/N122610/2020   | ACT | 2020-11-23 |
| OM857214 | EPI_ISL_2839351 | hRSV/A/Australia/P510179/2020   | ACT | 2020-11-19 |
| OM857215 | EPI_ISL_2839213 | hRSV/A/Australia/P511402/2020   | ACT | 2020-11-27 |
| OM857216 | EPI_ISL_2839275 | HRSV/A/Australia/WM3081573/2020 | NSW | 2020-11-03 |
| OM857217 | EPI_ISL_2839290 | HRSV/A/Australia/WM3200400/2020 | NSW | 2020-11-15 |
| OM857218 | EPI_ISL_2839264 | HRSV/A/Australia/WM3090116/2020 | NSW | 2020-11-04 |
| OM857219 | EPI_ISL_2839256 | HRSV/A/Australia/WM3160671/2020 | NSW | 2020-11-11 |
| OM857220 | EPI_ISL_2839277 | HRSV/A/Australia/WM3120229/2020 | NSW | 2020-11-07 |
| OM857221 | EPI_ISL_2839279 | HRSV/A/Australia/WM3140467/2020 | NSW | 2020-11-09 |
| OM857222 | EPI_ISL_2839288 | HRSV/A/Australia/WM3150812/2020 | NSW | 2020-11-10 |
| OM857223 | EPI_ISL_2839266 | HRSV/A/Australia/WM3202125/2020 | NSW | 2020-11-15 |
| OM857224 | EPI_ISL_2839208 | HRSV/A/Australia/WM3071668/2020 | NSW | 2020-11-02 |
| OM857225 | EPI_ISL_2839235 | HRSV/A/Australia/WM3181215/2020 | NSW | 2020-11-13 |

Supplementary information

|          |                 |                                  |     |            |
|----------|-----------------|----------------------------------|-----|------------|
| OM857226 | EPI_ISL_2839237 | HRSV/A/Australia/WM3260993/2020  | NSW | 2020-11-21 |
| OM857227 | EPI_ISL_2839354 | hRSV/A/Australia/P514660/2020    | ACT | 2020-11-20 |
| OM857228 | EPI_ISL_2839310 | hRSV/A/Australia/P520872/2020    | ACT | 2020-11-27 |
| OM857229 | EPI_ISL_2839215 | hRSV/A/Australia/P527755/2020    | ACT | 2020-11-28 |
| OM857230 | EPI_ISL_2839332 | HRSV/A/Australia/WM3111229/2020  | NSW | 2020-11-06 |
| OM857231 | EPI_ISL_2839285 | HRSV/A/Australia/WM3300592/2020  | NSW | 2020-11-25 |
| OM857232 | EPI_ISL_2839221 | HRSV/A/Australia/WM3142234/2020  | NSW | 2020-11-09 |
| OM857233 | EPI_ISL_2839334 | HRSV/A/Australia/WM3152749/2020  | NSW | 2020-11-10 |
| OM857234 | EPI_ISL_2839328 | HRSV/A/Australia/WM3160376/2020  | NSW | 2020-11-11 |
| OM857235 | EPI_ISL_2839248 | HRSV/A/Australia/WM3171598/2020  | NSW | 2020-11-12 |
| OM857236 | EPI_ISL_2839250 | HRSV/A/Australia/WM3220266/2020  | NSW | 2020-11-17 |
| OM857237 | EPI_ISL_2839252 | HRSV/A/Australia/WM3220890/2020  | NSW | 2020-11-17 |
| OM857238 | EPI_ISL_2839226 | HRSV/A/Australia/WM3253207/2020  | NSW | 2020-11-20 |
| OM857239 | EPI_ISL_2839296 | hRSV/A/Australia/P511810/2020    | ACT | 2020-11-27 |
| OM857240 | EPI_ISL_2839227 | hRSV/A/Australia/P527750/2020    | ACT | 2020-11-28 |
| OM857241 | EPI_ISL_2839207 | HRSV/A/Australia/WM3145009/2020  | NSW | 2020-11-09 |
| OM857242 | EPI_ISL_2839339 | HRSV/A/Australia/WM3281572/2020  | NSW | 2020-11-23 |
| OM857243 | EPI_ISL_2839242 | HRSV/A/Australia/WM3301231/2020  | NSW | 2020-11-25 |
| OM857244 | EPI_ISL_2839188 | HRSV/A/Australia/WM3073568/2020  | NSW | 2020-11-02 |
| OM857245 | EPI_ISL_2839206 | HRSV/A/Australia/WM3150792/2020  | NSW | 2020-11-10 |
| OM857246 | EPI_ISL_2839204 | HRSV/A/Australia/WM3151215/2020  | NSW | 2020-11-10 |
| OM857247 | EPI_ISL_2839205 | HRSV/A/Australia/WM3301586/2020  | NSW | 2020-11-25 |
| OM857248 | EPI_ISL_2839202 | HRSV/A/Australia/WM3281795/2020  | NSW | 2020-11-23 |
| OM857249 | EPI_ISL_2839294 | hRSV/A/Australia/P514373/2020    | ACT | 2020-11-23 |
| OM857250 | EPI_ISL_2839198 | HRSV/A/Australia/WM3303286/2020  | NSW | 2020-11-25 |
| OM857251 | EPI_ISL_2839356 | hRSV/A/Australia/P511794/2020    | ACT | 2020-11-27 |
| OM857252 | EPI_ISL_2839312 | hRSV/A/Australia/P536277/2020    | ACT | 2020-12-04 |
| OM857253 | EPI_ISL_2839324 | HRSV/A/Australia/WM3341974/2020  | NSW | 2020-11-29 |
| OM857254 | EPI_ISL_2839362 | HRSV/A/Australia/WM3152673/2020  | NSW | 2020-11-10 |
| OM857255 | EPI_ISL_2543764 | hRSV/A/Australia/VIC-MMC007/2021 | VIC | 2021-01-02 |
| OM857256 | EPI_ISL_2543771 | hRSV/A/Australia/VIC-MMC038/2020 | VIC | 2020-12-23 |
| OM857257 | EPI_ISL_2543784 | hRSV/A/Australia/VIC-RCH008/2021 | VIC | 2021-01-31 |
| OM857258 | EPI_ISL_2543772 | hRSV/A/Australia/VIC-MMC039/2020 | VIC | 2020-12-23 |
| OM857259 | EPI_ISL_2839326 | HRSV/A/Australia/WM3114268/2020  | NSW | 2020-11-06 |
| OM857260 | EPI_ISL_2839360 | HRSV/A/Australia/WM3341608/2020  | NSW | 2020-11-29 |
| OM857261 | EPI_ISL_2839322 | HRSV/A/Australia/WM3293488/2020  | NSW | 2020-11-24 |
| OM857262 | EPI_ISL_2543770 | hRSV/A/Australia/VIC-MMC035/2020 | VIC | 2020-12-22 |
| OM857263 | EPI_ISL_2543786 | hRSV/A/Australia/VIC-RCH010/2021 | VIC | 2021-02-06 |
| OM857264 | EPI_ISL_2543800 | hRSV/A/Australia/VIC-RCH035/2021 | VIC | 2021-02-28 |
| OM857265 | EPI_ISL_2839189 | HRSV/A/Australia/WM3080072/2020  | NSW | 2020-11-03 |
| OM857266 | EPI_ISL_2839419 | HRSV/A/Australia/WM3151529/2020  | NSW | 2020-11-10 |
| OM857267 | EPI_ISL_1653939 | hRSV/A/Australia/VIC-RCH001/2021 | VIC | 2021-01-02 |
| OM857268 | EPI_ISL_2839425 | hRSV/A/Australia/P506175/2020    | ACT | 2020-11-17 |
| OM857269 | EPI_ISL_2839427 | hRSV/A/Australia/P527732/2020    | ACT | 2020-11-28 |

### Supplementary information

|          |                 |                                    |     |            |
|----------|-----------------|------------------------------------|-----|------------|
| OM857270 | EPI_ISL_2839302 | hRSV/A/Australia/P507350/2020      | ACT | 2020-11-20 |
| OM857271 | EPI_ISL_2839231 | hRSV/A/Australia/P508521/2020      | ACT | 2020-11-19 |
| OM857272 | EPI_ISL_2839228 | hRSV/A/Australia/P511846/2020      | ACT | 2020-11-20 |
| OM857273 | EPI_ISL_2839304 | hRSV/A/Australia/P514323/2020      | ACT | 2020-11-23 |
| OM857274 | EPI_ISL_2839232 | hRSV/A/Australia/P525519/2020      | ACT | 2020-11-30 |
| OM857275 | EPI_ISL_2839298 | hRSV/A/Australia/P526371/2020      | ACT | 2020-11-30 |
| OM857276 | EPI_ISL_2839273 | HRSV/A/Australia/WM3351169/2020    | NSW | 2020-11-30 |
| OM857277 | EPI_ISL_2839217 | hRSV/A/Australia/P522722/2020      | ACT | 2020-11-29 |
| OM857278 | EPI_ISL_2839214 | hRSV/A/Australia/P527905/2020      | ACT | 2020-11-25 |
| OM857279 | EPI_ISL_2839229 | hRSV/A/Australia/P510167/2020      | ACT | 2020-11-23 |
| OM857280 | EPI_ISL_2839292 | HRSV/A/Australia/WM3280848/2020    | NSW | 2020-11-23 |
| OM857281 | EPI_ISL_2839347 | HRSV/A/Australia/WM3312123/2020    | NSW | 2020-11-26 |
| OM857282 | EPI_ISL_2839216 | hRSV/A/Australia/P525045/2020      | ACT | 2020-11-30 |
| OM857283 | EPI_ISL_2839233 | hRSV/A/Australia/P515852/2020      | ACT | 2020-11-28 |
| OM857284 | EPI_ISL_2839230 | hRSV/A/Australia/P520806/2020      | ACT | 2020-11-28 |
| OM857285 | EPI_ISL_2839306 | hRSV/A/Australia/P517150/2020      | ACT | 2020-11-20 |
| OM857286 | EPI_ISL_2839308 | hRSV/A/Australia/P507573/2020      | ACT | 2020-11-19 |
| OM857287 | EPI_ISL_2839424 | hRSV/A/Australia/P520545/2020      | ACT | 2020-11-29 |
| OM857288 | EPI_ISL_2839218 | hRSV/A/Australia/P533369/2020      | ACT | 2020-12-03 |
| OM857289 | EPI_ISL_2839234 | hRSV/A/Australia/P538685/2020      | ACT | 2020-12-07 |
| OM857290 | EPI_ISL_1653938 | hRSV/A/Australia/VIC-VIDRL001/2020 | VIC | 2020-12-22 |
| OM857291 | EPI_ISL_2839190 | hRSV/A/Australia/P520445/2020      | ACT | 2020-11-26 |
| OM857292 | EPI_ISL_2839281 | HRSV/A/Australia/WM3171321/2020    | NSW | 2020-11-12 |
| OM857293 | EPI_ISL_2839258 | HRSV/A/Australia/WM3221617/2020    | NSW | 2020-11-17 |
| OM857294 | EPI_ISL_2839197 | hRSV/A/Australia/P535659/2020      | ACT | 2020-12-04 |
| OM857295 | EPI_ISL_2839196 | HRSV/A/Australia/WM3151688/2020    | NSW | 2020-11-10 |
| OM857296 | EPI_ISL_2839260 | HRSV/A/Australia/WM3060152/2020    | NSW | 2020-11-01 |
| OM857297 | EPI_ISL_2839254 | HRSV/A/Australia/WM3081844/2020    | NSW | 2020-11-03 |
| OM857298 | EPI_ISL_2839244 | HRSV/A/Australia/WM3302850/2020    | NSW | 2020-11-25 |
| OM857299 | EPI_ISL_2839320 | HRSV/A/Australia/WM3084781/2020    | NSW | 2020-11-03 |
| OM857300 | EPI_ISL_2839343 | HRSV/A/Australia/WM3221870/2020    | NSW | 2020-11-17 |
| OM857301 | EPI_ISL_2839318 | HRSV/A/Australia/WM3100311/2020    | NSW | 2020-11-05 |
| OM857302 | EPI_ISL_2839341 | HRSV/A/Australia/WM3101273/2020    | NSW | 2020-11-05 |
| OM857303 | EPI_ISL_2839236 | HRSV/A/Australia/WM3212551/2020    | NSW | 2020-11-16 |
| OM857304 | EPI_ISL_2839345 | HRSV/A/Australia/WM3292889/2020    | NSW | 2020-11-24 |
| OM857305 | EPI_ISL_2839316 | HRSV/A/Australia/WM3301616/2020    | NSW | 2020-11-25 |
| OM857306 | EPI_ISL_2839358 | HRSV/A/Australia/WM3101170/2020    | NSW | 2020-11-05 |
| OM857307 | EPI_ISL_2839330 | HRSV/A/Australia/WM3331626/2020    | NSW | 2020-11-28 |
| OM857308 | EPI_ISL_2839337 | HRSV/A/Australia/WM3151664/2020    | NSW | 2020-11-10 |
| OM857309 | EPI_ISL_2839222 | HRSV/A/Australia/WM3180278/2020    | NSW | 2020-11-13 |
| OM857310 | EPI_ISL_2839225 | HRSV/A/Australia/WM3301224/2020    | NSW | 2020-11-25 |
| OM857311 | EPI_ISL_2839209 | HRSV/A/Australia/WM3231345/2020    | NSW | 2020-11-18 |
| OM857312 | EPI_ISL_2839210 | HRSV/A/Australia/WM3321046/2020    | NSW | 2020-11-27 |
| OM857313 | EPI_ISL_2839269 | HRSV/A/Australia/WM3280473/2020    | NSW | 2020-11-23 |

Supplementary information

|          |                 |                                    |     |            |
|----------|-----------------|------------------------------------|-----|------------|
| OM857314 | EPI_ISL_2839271 | HRSV/A/Australia/WM3341337/2020    | NSW | 2020-11-29 |
| OM857315 | EPI_ISL_2839246 | HRSV/A/Australia/WM3180542/2020    | NSW | 2020-11-13 |
| OM857316 | EPI_ISL_2839224 | HRSV/A/Australia/WM3202528/2020    | NSW | 2020-11-15 |
| OM857317 | EPI_ISL_2839313 | HRSV/A/Australia/WM3291066/2020    | NSW | 2020-11-24 |
| OM857318 | EPI_ISL_2839239 | HRSV/A/Australia/WM3141851/2020    | NSW | 2020-11-09 |
| OM857319 | EPI_ISL_2839219 | HRSV/A/Australia/WM3151206/2020    | NSW | 2020-11-10 |
| OM857320 | EPI_ISL_2839223 | HRSV/A/Australia/WM3323284/2020    | NSW | 2020-11-27 |
| OM857321 | EPI_ISL_2839262 | HRSV/A/Australia/WM3312926/2020    | NSW | 2020-11-26 |
| OM857322 | EPI_ISL_2839220 | HRSV/A/Australia/WM3201552/2020    | NSW | 2020-11-15 |
| OM857323 | EPI_ISL_2839349 | HRSV/A/Australia/WM3324484/2020    | NSW | 2020-11-27 |
| OM857324 | EPI_ISL_2839203 | HRSV/A/Australia/WM3321824/2020    | NSW | 2020-11-27 |
| OM857325 | EPI_ISL_2839283 | HRSV/A/Australia/WM3322984/2020    | NSW | 2020-11-27 |
| OM857326 | EPI_ISL_2839187 | HRSV/A/Australia/WM3071478/2020    | NSW | 2020-11-02 |
| OM857327 | EPI_ISL_2839186 | HRSV/A/Australia/WM3071531/2020    | NSW | 2020-11-02 |
| OM857328 | EPI_ISL_2839420 | HRSV/A/Australia/WM3174399/2020    | NSW | 2020-11-12 |
| OM857329 | EPI_ISL_2839191 | HRSV/A/Australia/WM3151642/2020    | NSW | 2020-11-10 |
| OM857330 | EPI_ISL_1653941 | hRSV/A/Australia/VIC-RCH002/2020   | VIC | 2020-12-20 |
| OM857331 | EPI_ISL_1653944 | hRSV/A/Australia/VIC-VIDRL003/2020 | VIC | 2020-12-28 |
| OM857332 | EPI_ISL_1653948 | hRSV/A/Australia/VIC-VIDRL005/2020 | VIC | 2020-12-29 |
| OM857333 | EPI_ISL_1653946 | hRSV/A/Australia/VIC-VIDRL004/2020 | VIC | 2020-12-29 |
| OM857334 | EPI_ISL_2811729 | hRSV/A/Australia/VIC-RCH007/2020   | VIC | 2020-11-26 |
| OM857335 | EPI_ISL_2543765 | hRSV/A/Australia/VIC-MMC014/2020   | VIC | 2020-12-19 |
| OM857336 | EPI_ISL_2543787 | hRSV/A/Australia/VIC-RCH011/2021   | VIC | 2021-02-06 |
| OM857337 | EPI_ISL_2543797 | hRSV/A/Australia/VIC-RCH030/2021   | VIC | 2021-02-22 |
| OM857338 | EPI_ISL_2543789 | hRSV/A/Australia/VIC-RCH013/2021   | VIC | 2021-02-12 |
| OM857339 | EPI_ISL_2543774 | hRSV/A/Australia/VIC-MMC053/2020   | VIC | 2020-12-30 |
| OM857340 | EPI_ISL_2543780 | hRSV/A/Australia/VIC-MMC065/2021   | VIC | 2021-01-12 |
| OM857341 | EPI_ISL_2543805 | hRSV/A/Australia/VIC-RCH048/2021   | VIC | 2021-03-07 |
| OM857342 | EPI_ISL_2543807 | hRSV/A/Australia/VIC-RCH051/2021   | VIC | 2021-03-08 |
| OM857343 | EPI_ISL_2543767 | hRSV/A/Australia/VIC-MMC027/2020   | VIC | 2020-12-21 |
| OM857344 | EPI_ISL_2543778 | hRSV/A/Australia/VIC-MMC064/2020   | VIC | 2020-12-31 |
| OM857345 | EPI_ISL_2543795 | hRSV/A/Australia/VIC-RCH022/2021   | VIC | 2021-02-15 |
| OM857346 | EPI_ISL_2543790 | hRSV/A/Australia/VIC-RCH016/2021   | VIC | 2021-02-11 |
| OM857347 | EPI_ISL_2543804 | hRSV/A/Australia/VIC-RCH047/2021   | VIC | 2021-03-04 |
| OM857348 | EPI_ISL_2839428 | HRSV/A/Australia/WM3291678/2020    | NSW | 2020-11-24 |
| OM857349 | EPI_ISL_2839422 | HRSV/A/Australia/WM3110533/2020    | NSW | 2020-11-06 |
| OM857350 | EPI_ISL_2543775 | hRSV/A/Australia/VIC-MMC054/2020   | VIC | 2020-12-30 |
| OM857351 | EPI_ISL_2543762 | hRSV/A/Australia/VIC-MMC073/2021   | VIC | 2021-01-13 |
| OM857352 | EPI_ISL_2543783 | hRSV/A/Australia/VIC-RCH007/2021   | VIC | 2021-01-16 |
| OM857353 | EPI_ISL_2543796 | hRSV/A/Australia/VIC-RCH026/2021   | VIC | 2021-02-20 |
| OM857354 | EPI_ISL_2543798 | hRSV/A/Australia/VIC-RCH031/2021   | VIC | 2021-02-27 |
| OM857355 | EPI_ISL_2543769 | hRSV/A/Australia/VIC-MMC033/2020   | VIC | 2020-12-21 |
| OM857356 | EPI_ISL_2543785 | hRSV/A/Australia/VIC-RCH009/2021   | VIC | 2021-02-07 |
| OM857357 | EPI_ISL_2839212 | HRSV/A/Australia/WM3080869/2020    | NSW | 2020-11-03 |

### Supplementary information

|          |                 |                                  |     |            |
|----------|-----------------|----------------------------------|-----|------------|
| OM857358 | EPI_ISL_2839211 | HRSV/A/Australia/WM3291444/2020  | NSW | 2020-11-24 |
| OM857359 | EPI_ISL_2543766 | hRSV/A/Australia/VIC-MMC024/2020 | VIC | 2020-12-21 |
| OM857360 | EPI_ISL_2543781 | hRSV/A/Australia/VIC-MMC099/2021 | VIC | 2021-01-18 |
| OM857361 | EPI_ISL_2839451 | hRSV/A/Australia/P522837/2020    | ACT | 2020-11-28 |
| OM857362 | EPI_ISL_2839201 | HRSV/A/Australia/WM3131917/2020  | NSW | 2020-11-08 |
| OM857363 | EPI_ISL_1653942 | hRSV/A/Australia/VIC-RCH002/2021 | VIC | 2021-01-03 |
| OM857364 | EPI_ISL_2839200 | HRSV/A/Australia/WM3210899/2020  | NSW | 2020-11-16 |
| OM857365 | EPI_ISL_2839178 | hRSV/A/Australia/P513256/2020    | ACT | 2020-11-22 |
| OM857366 | EPI_ISL_2839395 | hRSV/A/Australia/1013898/2021    | WA  | 2021-02-01 |
| OM857367 | EPI_ISL_2839396 | hRSV/A/Australia/2010230/2020    | WA  | 2020-11-12 |
| OM857368 | EPI_ISL_2839376 | hRSV/B/Australia/7527H/2019      | WA  | 1905-07-11 |
| OM857369 | EPI_ISL_2839455 | hRSV/B/Australia/M236813/2019    | ACT | 2019-07-27 |
| OM857370 | EPI_ISL_2839452 | HRSV/B/Australia/WM0742913/2020  | NSW | 2020-03-14 |
| OM857371 | EPI_ISL_2839456 | hRSV/B/Australia/M262451/2019    | ACT | 2019-09-12 |
| OM857372 | EPI_ISL_2839457 | HRSV/B/Australia/WM0634962/2020  | NSW | 2020-03-03 |
| OM857373 | EPI_ISL_2839450 | hRSV/B/Australia/M236822/2019    | ACT | 2019-07-27 |
| OM857374 | EPI_ISL_2839437 | HRSV/B/Australia/WM0331623/2020  | NSW | 2020-02-02 |
| OM857375 | EPI_ISL_2839185 | HRSV/B/Australia/WM0663762/2020  | NSW | 2020-03-06 |
| OM857376 | EPI_ISL_2839393 | HRSV/B/Australia/WM0715241/2020  | NSW | 2020-03-11 |
| OM857377 | EPI_ISL_2839394 | HRSV/B/Australia/WM0573055/2020  | NSW | 2020-02-26 |
| OM857378 | EPI_ISL_2839435 | HRSV/B/Australia/WM0711659/2020  | NSW | 2020-03-11 |
| OM857379 | EPI_ISL_2839180 | HRSV/B/Australia/WM0531461/2020  | NSW | 2020-02-22 |
| OM857380 | EPI_ISL_2839368 | HRSV/B/Australia/WM1603138/2020  | NSW | 2020-06-08 |
| OM857381 | EPI_ISL_2839454 | HRSV/B/Australia/WM0636501/2020  | NSW | 2020-03-03 |
| OM857382 | EPI_ISL_2543849 | hRSV/B/Australia/VIC-RCH025/2021 | VIC | 2021-02-20 |
| OM857383 | EPI_ISL_2543851 | hRSV/B/Australia/VIC-RCH057/2021 | VIC | 2021-03-06 |
| OM857384 | EPI_ISL_2543853 | hRSV/B/Australia/VIC-RCH060/2021 | VIC | 2021-02-22 |
| OM857385 | EPI_ISL_2543850 | hRSV/B/Australia/VIC-RCH053/2021 | VIC | 2021-03-07 |
| OM857386 | EPI_ISL_2543763 | hRSV/B/Australia/VIC-RCH059/2021 | VIC | 2021-02-22 |
| OM857387 | EPI_ISL_2543852 | hRSV/B/Australia/VIC-RCH058/2021 | VIC | 2021-02-21 |
| OM857388 | EPI_ISL_2839374 | HRSV/B/Australia/WM3181190/2020  | NSW | 2020-11-13 |
| OM857389 | EPI_ISL_2839416 | HRSV/B/Australia/WM3181191/2020  | NSW | 2020-11-13 |
| OM857390 | EPI_ISL_2839417 | HRSV/B/Australia/WM0322845/2020  | NSW | 2020-02-01 |
| OM857391 | EPI_ISL_2839436 | HRSV/B/Australia/WM0543490/2020  | NSW | 2020-02-23 |
| OM857392 | EPI_ISL_2839453 | hRSV/B/Australia/9391H/2019      | WA  | 1905-07-11 |
| OM857393 | EPI_ISL_2839449 | HRSV/B/Australia/WM0782450/2020  | NSW | 2020-03-18 |
| OM857394 | EPI_ISL_2839434 | hRSV/B/Australia/M248046/2019    | ACT | 2019-08-08 |
| OM857395 | EPI_ISL_2839193 | HRSV/B/Australia/WM0420543/2020  | NSW | 2020-02-11 |
| OM857396 | EPI_ISL_2839366 | HRSV/B/Australia/WM0421262/2020  | NSW | 2020-02-11 |
| OM857397 | EPI_ISL_2839442 | HRSV/B/Australia/WM0653812/2020  | NSW | 2020-03-05 |

87 \*Locations include the Australian Capital Territory (ACT), New South Wales (NSW), Western Australia (WA)  
88 and Victoria (VIC).

Supplementary information

89 **Supplementary Table 2. Contrast-FEL results with p value < 0.05. Here, hypothesis testing is performed on a site-specific basis using the**  
 90 **Likelihood Ratio Test to estimate if non-synonymous substitution rates (dN) along a test branch differs to the dN of reference branches, relative to**  
 91 **synonymous substitution rates (dS).**

| Clade       | Gene | Gene position | Site | Partition | alpha | beta (background) | beta (Foreground) | subs (Foreground) | P-value (overall) | Q-value (overall) | Permutation p-value | Total branch length |
|-------------|------|---------------|------|-----------|-------|-------------------|-------------------|-------------------|-------------------|-------------------|---------------------|---------------------|
| NSW/ACT/VIC | NS1  | 9             | 9    | 1         | 0     | 0                 | 175.687           | 1                 | 0.001             | 1                 | 1                   | 0.59                |
| NSW/ACT/VIC | NS2  | 3             | 142  | 1         | 1.729 | 0.489             | 109.44            | 1                 | 0.005             | 1                 | 0.05                | 1.121               |
| NSW/ACT/VIC | G    | 225           | 1440 | 1         | 1.744 | 1.42              | 96.981            | 1                 | 0.014             | 1                 | 1                   | 1.67                |
| NSW/ACT/VIC | G    | 263           | 1478 | 1         | 0     | 0                 | 331.571           | 1                 | 0                 | 1                 | 1                   | 1.114               |
| NSW/ACT/VIC | G    | 265           | 1480 | 1         | 0     | 1.168             | 96.068            | 1                 | 0.014             | 1                 | 0.05                | 1.058               |
| NSW/ACT/VIC | G    | 273           | 1488 | 1         | 0     | 5.23              | 143.528           | 1                 | 0.04              | 1                 | 1                   | 3.776               |
| NSW/ACT/VIC | G    | 277           | 1492 | 1         | 8.718 | 1.312             | 108.1             | 1                 | 0.015             | 1                 | 1                   | 3.437               |
| NSW/ACT/VIC | G    | 291           | 1506 | 1         | 3.521 | 0.551             | 108.494           | 1                 | 0.006             | 1                 | 0.2                 | 1.619               |
| NSW/ACT/VIC | G    | 297           | 1512 | 1         | 0     | 1.941             | 143.588           | 1                 | 0.013             | 1                 | 0.083               | 1.705               |
| NSW/ACT/VIC | G    | 316           | 1531 | 1         | 1.682 | 0.973             | 108.226           | 1                 | 0.009             | 1                 | 1                   | 1.41                |
| NSW/ACT/VIC | L    | 755           | 3058 | 1         | 0     | 0                 | 98.148            | 1                 | 0.001             | 0.926             | 0.2                 | 0.33                |
| WA          | N    | 104           | 367  | 1         | 5.2   | 0                 | 188.347           | 1                 | 0.001             | 1                 | 0.5                 | 1.974               |
| WA          | SH   | 51            | 1202 | 1         | 0     | 0.49              | 120.968           | 1                 | 0.005             | 1                 | 1                   | 0.715               |
| WA          | G    | 80            | 1295 | 1         | 2.939 | 0.484             | 105.505           | 1                 | 0.005             | 1                 | 0.2                 | 1.417               |
| WA          | G    | 129           | 1344 | 1         | 0     | 0                 | 113.439           | 1                 | 0.001             | 0.968             | 1                   | 0.381               |
| WA          | G    | 174           | 1389 | 1         | 0     | 0                 | 103.368           | 1                 | 0.001             | 1                 | 1                   | 0.347               |

92



Supplementary information

93

94 **Supplementary Table 3. Results (three replicates) of RELAX analysis for NSW/ACT/VIC and WA clades, which provides alternative model testing**  
 95 **using a Likelihood Ratio Test for relaxation or intensification of selection pressure along test branches**

| Clade           | Type            | Reference $\omega_1$ | Test $\omega_1$ | Reference $\omega_2$ | Test $\omega_2$ | Reference $\omega_3$ | Test $\omega_3$ | K    | P-value  | Likelihood ratio |
|-----------------|-----------------|----------------------|-----------------|----------------------|-----------------|----------------------|-----------------|------|----------|------------------|
| NSW/ACT/<br>VIC | Intensification | 0.00 (3.88%)         | 0.00 (3.88%)    | 0.02 (89.99%)        | 0.00 (89.99%)   | 1.68 (6.13%)         | 4.35 (6.13%)    | 2.82 | 3.57E-14 | 57.39            |
|                 | Intensification | 0.00 (66.96%)        | 0.00 (66.96%)   | 0.00 (25.17%)        | 0.00 (25.17%)   | 1.47 (7.88%)         | 3.39 (7.88%)    | 3.15 | 5.27E-14 | 56.62            |
|                 | Intensification | 0.04 (90.07%)        | 0.00 (90.07%)   | 0.08 (7.33%)         | 0.00 (7.33%)    | 2.77 (2.60%)         | 10.3 (2.60%)    | 2.28 | 1.22E-14 | 59.50            |
| WA              | Intensification | 0.00 (8.87%)         | 0.00 (8.87%)    | 0.10 (90.87%)        | 0.00 (90.87%)   | 8.62 (0.26%)         | 168 (0.26%)     | 2.38 | 4.44E-16 | 66.11            |
|                 | Intensification | 0.00 (18.44%)        | 0.00 (18.44%)   | 0.12 (81.30%)        | 0.01 (81.30%)   | 8.83 (0.26%)         | 170 (0.26%)     | 2.36 | 4.44E-16 | 66.29            |
|                 | Intensification | 0.00 (14.82%)        | 0.00 (14.82%)   | 0.11 (84.93%)        | 0.01 (84.93%)   | 9.17 (0.25%)         | 172 (0.25%)     | 2.32 | 3.33E-16 | 66.53            |

96

97 **Supplementary Table 4. SLAC, SNAP and Contrast-FEL results for NSW/ACT/VIC and WA clades**

| Clade                  | SLAC  |                            | SNAP  |                            | Contrast-FEL               |                            |
|------------------------|-------|----------------------------|-------|----------------------------|----------------------------|----------------------------|
|                        | dN/dS | Relative rate <sup>b</sup> | dN/dS | Relative rate <sup>b</sup> | dN/dS                      | Relative rate <sup>b</sup> |
| NSW/ACT/VIC            | 0.282 | 1.373                      | 0.133 | 1.218                      | 0.266                      | 1.396                      |
| WA                     | 0.411 | 1.697                      | 0.238 | 1.541                      | 0.378                      | 1.687                      |
| Reference <sup>a</sup> | 0.134 | -                          | 0.062 | -                          | 0.116 (0.117) <sup>c</sup> | -                          |

98 <sup>a</sup>sub-sampled global dataset comprising genomes from major clades.99 <sup>b</sup>the ratio of evolution rate of outbreak sequences (NSW/ACT/VIC and WA) versus non-outbreak sequences  
100 according to the method proposed by Smith G J D *et al.* (available from  
101 <https://www.nature.com/articles/nature08182>). In this study, the number of non-synonymous sites is ~3.8  
102 times as much as the number of synonymous sites, which was calculated by SNAP.103 <sup>c</sup>dN/dS of reference is 0.116 (0.117) when selecting NSW/ACT/VIC (WA) clades as foreground and  
104 subsampled global dataset as background.
