# Supplementary material for: Off-season RSV epidemics in Australia after easing of COVID-19 restrictions
Source: PubMed Central journal article supplement (PMC9130497; doi:10.1038/s41467-022-30485-3), 2022-05-24
Supplement: 41467_2022_30485_MOESM3_ESM.pdf [file 41467_2022_30485_MOESM3_ESM.pdf]

## **Description of Additional Supplementary Files**

### ***Supplementary Data 1***

Sample list with GenBank & GISAID accession numbers, source locations and collection dates for study samples.

### ***Supplementary Data 2***

Sample list with GenBank & GISAID accession numbers, source locations and collection dates for reference sequences sourced from public databases.

### ***Supplementary Data 3***

Acknowledgement table for sequences source from GISAID EpiRSV database.
