# Supplementary material for: Off-season RSV epidemics in Australia after easing of COVID-19 restrictions
Source: PubMed Central journal article supplement (PMC9130497; doi:10.1038/s41467-022-30485-3), 2022-05-24
Supplement: 41467_2022_30485_MOESM6_ESM.pdf [file 41467_2022_30485_MOESM6_ESM.pdf]

## **Description of Additional Supplementary File**

### ***Supplementary Data 3***

Acknowledgement table for sequences source from GISAID EpiRSV database.

We gratefully acknowledge the following Authors from the Originating laboratories responsible for obtaining the specimens, as well as the Submitting laboratories where the genome data were generated and shared via GISAID, on which this research is based.

All Submitters of data may be contacted directly via [www.gisaid.org](http://www.gisaid.org)

Authors are sorted alphabetically.

| Accession ID                                                                                                                                                                                                                                                                                                                                                                                                                                                                                                                                                                                                                                                                                                                                                                                                                                                                                                                                                                                                                                                                                                                                                                                                                                                                                                                                                                                                                                                                                                                                                                                                                                                                                                                                                                                                                                                                                                                                                                                                                                                                                                                                                                                                                                                                                                                                                                                                                                                                                                                                                                                                                                                                                                                                                                                                                                                                                                                                                                                                                                                                                                                                                                                                                                                                                                                                                                                                                                                                                                                                                                                                                                                                                                                                                                                                                                                                                                                                                                                                                                                                                                                                                                                                                                                                                                                                                                                                                                                                                                                                                                                                                                                                                                                                                                                                                                                      | Originating Laboratory                                                    | Submitting Laboratory                                                                             | Authors                                                                                                                                                                                        |
|-------------------------------------------------------------------------------------------------------------------------------------------------------------------------------------------------------------------------------------------------------------------------------------------------------------------------------------------------------------------------------------------------------------------------------------------------------------------------------------------------------------------------------------------------------------------------------------------------------------------------------------------------------------------------------------------------------------------------------------------------------------------------------------------------------------------------------------------------------------------------------------------------------------------------------------------------------------------------------------------------------------------------------------------------------------------------------------------------------------------------------------------------------------------------------------------------------------------------------------------------------------------------------------------------------------------------------------------------------------------------------------------------------------------------------------------------------------------------------------------------------------------------------------------------------------------------------------------------------------------------------------------------------------------------------------------------------------------------------------------------------------------------------------------------------------------------------------------------------------------------------------------------------------------------------------------------------------------------------------------------------------------------------------------------------------------------------------------------------------------------------------------------------------------------------------------------------------------------------------------------------------------------------------------------------------------------------------------------------------------------------------------------------------------------------------------------------------------------------------------------------------------------------------------------------------------------------------------------------------------------------------------------------------------------------------------------------------------------------------------------------------------------------------------------------------------------------------------------------------------------------------------------------------------------------------------------------------------------------------------------------------------------------------------------------------------------------------------------------------------------------------------------------------------------------------------------------------------------------------------------------------------------------------------------------------------------------------------------------------------------------------------------------------------------------------------------------------------------------------------------------------------------------------------------------------------------------------------------------------------------------------------------------------------------------------------------------------------------------------------------------------------------------------------------------------------------------------------------------------------------------------------------------------------------------------------------------------------------------------------------------------------------------------------------------------------------------------------------------------------------------------------------------------------------------------------------------------------------------------------------------------------------------------------------------------------------------------------------------------------------------------------------------------------------------------------------------------------------------------------------------------------------------------------------------------------------------------------------------------------------------------------------------------------------------------------------------------------------------------------------------------------------------------------------------------------------------------------------------------------|---------------------------------------------------------------------------|---------------------------------------------------------------------------------------------------|------------------------------------------------------------------------------------------------------------------------------------------------------------------------------------------------|
| EPI_ISL_1074025, EPI_ISL_1074026, EPI_ISL_1074027, EPI_ISL_1074028, EPI_ISL_1074029, EPI_ISL_1074030, EPI_ISL_1074031, EPI_ISL_1074032, EPI_ISL_1074033, EPI_ISL_1074034, EPI_ISL_1074035, EPI_ISL_1074036, EPI_ISL_1074037, EPI_ISL_1074038, EPI_ISL_1074039, EPI_ISL_1074040, EPI_ISL_1074041, EPI_ISL_1074042, EPI_ISL_1074043, EPI_ISL_1074044, EPI_ISL_1074045, EPI_ISL_1074046, EPI_ISL_1074047, EPI_ISL_1074048, EPI_ISL_1074049, EPI_ISL_1074050, EPI_ISL_1074051, EPI_ISL_1074052, EPI_ISL_1074053, EPI_ISL_1074054, EPI_ISL_1074055, EPI_ISL_1074056, EPI_ISL_1074057, EPI_ISL_1074058, EPI_ISL_1074059, EPI_ISL_1074060, EPI_ISL_1074061, EPI_ISL_1074062, EPI_ISL_1074063, EPI_ISL_1074064, EPI_ISL_1074065, EPI_ISL_1074066, EPI_ISL_1074067, EPI_ISL_1074068, EPI_ISL_1074069, EPI_ISL_1074070, EPI_ISL_1074071, EPI_ISL_1074072, EPI_ISL_1074073, EPI_ISL_1074074, EPI_ISL_1074075, EPI_ISL_1074076, EPI_ISL_1074077, EPI_ISL_1074078, EPI_ISL_1074079, EPI_ISL_1074080, EPI_ISL_1074081, EPI_ISL_1074082, EPI_ISL_1074083, EPI_ISL_1074084, EPI_ISL_1074085, EPI_ISL_1074086, EPI_ISL_1074087, EPI_ISL_1074088, EPI_ISL_1074089, EPI_ISL_1074090, EPI_ISL_1074091, EPI_ISL_1074092, EPI_ISL_1074093, EPI_ISL_1074094, EPI_ISL_1074095, EPI_ISL_1074096, EPI_ISL_1074097, EPI_ISL_1074098, EPI_ISL_1074099, EPI_ISL_1074100, EPI_ISL_1074101, EPI_ISL_1074102, EPI_ISL_1074103, EPI_ISL_1074104, EPI_ISL_1074105, EPI_ISL_1074106, EPI_ISL_1074107, EPI_ISL_1074108, EPI_ISL_1074109, EPI_ISL_1074110, EPI_ISL_1074111, EPI_ISL_1074112, EPI_ISL_1074113, EPI_ISL_1074114, EPI_ISL_1074115, EPI_ISL_1074116, EPI_ISL_1074117, EPI_ISL_1074118, EPI_ISL_1074119, EPI_ISL_1074120, EPI_ISL_1074121, EPI_ISL_1074122, EPI_ISL_1074123, EPI_ISL_1074124, EPI_ISL_1074125, EPI_ISL_1074126, EPI_ISL_1074127, EPI_ISL_1074128, EPI_ISL_1074129, EPI_ISL_1074130, EPI_ISL_1074131, EPI_ISL_1074132, EPI_ISL_1074133, EPI_ISL_1074134, EPI_ISL_1074135, EPI_ISL_1074136, EPI_ISL_1074137, EPI_ISL_1074138, EPI_ISL_1074139, EPI_ISL_1074140, EPI_ISL_1074141, EPI_ISL_1074142, EPI_ISL_1074143, EPI_ISL_1074144, EPI_ISL_1074145, EPI_ISL_1074146, EPI_ISL_1074147, EPI_ISL_1074148, EPI_ISL_1074149, EPI_ISL_1074150, EPI_ISL_1074151, EPI_ISL_1074152, EPI_ISL_1074153, EPI_ISL_1074154, EPI_ISL_1074155, EPI_ISL_1074156, EPI_ISL_1074157, EPI_ISL_1074158, EPI_ISL_1074159, EPI_ISL_1074160, EPI_ISL_1074161, EPI_ISL_1074162, EPI_ISL_1074163, EPI_ISL_1074164, EPI_ISL_1074165, EPI_ISL_1074166, EPI_ISL_1074167, EPI_ISL_1074168, EPI_ISL_1074169, EPI_ISL_1074170, EPI_ISL_1074171, EPI_ISL_1074172, EPI_ISL_1074173, EPI_ISL_1074174, EPI_ISL_1074175, EPI_ISL_1074176, EPI_ISL_1074177, EPI_ISL_1074178, EPI_ISL_1074179, EPI_ISL_1074180, EPI_ISL_1074181, EPI_ISL_1074182, EPI_ISL_1074183, EPI_ISL_1074184, EPI_ISL_1074185, EPI_ISL_1074186, EPI_ISL_1074187, EPI_ISL_1074188, EPI_ISL_1074189, EPI_ISL_1074190, EPI_ISL_1074191, EPI_ISL_1074192, EPI_ISL_1074193, EPI_ISL_1074194, EPI_ISL_1074195, EPI_ISL_1074196, EPI_ISL_1074197, EPI_ISL_1074198, EPI_ISL_1074199, EPI_ISL_1074200, EPI_ISL_1074201, EPI_ISL_1074202, EPI_ISL_1074203, EPI_ISL_1074205, EPI_ISL_1074206, EPI_ISL_1074207, EPI_ISL_1074208, EPI_ISL_1074209, EPI_ISL_1074210, EPI_ISL_1074211, EPI_ISL_1074212, EPI_ISL_1074213, EPI_ISL_1074214, EPI_ISL_1074215, EPI_ISL_1074216, EPI_ISL_1074217, EPI_ISL_1074218, EPI_ISL_1074219, EPI_ISL_1074220, EPI_ISL_1074221, EPI_ISL_1074222, EPI_ISL_1074223, EPI_ISL_1074224, EPI_ISL_1074225, EPI_ISL_1074226, EPI_ISL_1074227, EPI_ISL_1074228, EPI_ISL_1074229, EPI_ISL_1074230, EPI_ISL_1074231, EPI_ISL_1074232, EPI_ISL_1074233, EPI_ISL_1074234, EPI_ISL_1074235, EPI_ISL_1074236, EPI_ISL_1074237, EPI_ISL_1074238, EPI_ISL_1074239, EPI_ISL_1074240, EPI_ISL_1074241, EPI_ISL_1074242, EPI_ISL_1074243, EPI_ISL_1074244, EPI_ISL_1074245, EPI_ISL_1074246, EPI_ISL_1074247, EPI_ISL_1074248, EPI_ISL_1074249, EPI_ISL_1074250, EPI_ISL_1074251, EPI_ISL_1074252, EPI_ISL_1074253, EPI_ISL_1074254, EPI_ISL_1074255, EPI_ISL_1074256, EPI_ISL_1074257, EPI_ISL_1074258, EPI_ISL_1074259, EPI_ISL_1074260, EPI_ISL_1074261, EPI_ISL_1074262, EPI_ISL_1074263, EPI_ISL_1074264, EPI_ISL_1074265, EPI_ISL_1074266, EPI_ISL_1074267, EPI_ISL_1074268, EPI_ISL_1074269, EPI_ISL_1074270, EPI_ISL_1074271, EPI_ISL_1074272, EPI_ISL_1074273, EPI_ISL_1074274, EPI_ISL_1074275, EPI_ISL_1074276, EPI_ISL_1074277, EPI_ISL_1074278, EPI_ISL_1074279, EPI_ISL_1074280, EPI_ISL_1074281, EPI_ISL_1074282, EPI_ISL_1074283, EPI_ISL_1074284, EPI_ISL_1074285, EPI_ISL_1074286, EPI_ISL_1074287, EPI_ISL_1074288, EPI_ISL_1074289, EPI_ISL_1074290, EPI_ISL_1074291, EPI_ISL_1074292, EPI_ISL_1074293, EPI_ISL_1074294, EPI_ISL_1074295, EPI_ISL_1074296, EPI_ISL_1074297, EPI_ISL_1074298, EPI_ISL_1074299, EPI_ISL_1074300 | Virology Laboratory, Ricardo Gutiérrez Children's Hospital                | Vanderbilt University Medical Center / Virology Laboratory, Ricardo Gutiérrez Children's Hospital | Goya, Stephanie; Lucion, Maria Florencia; Juarez, Maria del Valle; Shilts, Meghan; Gentile, Angela; Mistchenko, Alicia S.; Das, Suman# & Viegas, Mariana# (#contributed equally to this study) |
| EPI_ISL_1520381, EPI_ISL_1520382, EPI_ISL_1520383, EPI_ISL_1520384, EPI_ISL_1520385, EPI_ISL_1520386, EPI_ISL_1520387, EPI_ISL_1520388, EPI_ISL_1520389, EPI_ISL_1520390, EPI_ISL_1520391, EPI_ISL_1520392, EPI_ISL_1520393, EPI_ISL_1520394, EPI_ISL_1520395, EPI_ISL_1520396, EPI_ISL_1520397, EPI_ISL_1520398, EPI_ISL_1520399, EPI_ISL_1520400, EPI_ISL_1520401, EPI_ISL_1520402, EPI_ISL_1520403, EPI_ISL_1520404, EPI_ISL_1520405, EPI_ISL_1520406, EPI_ISL_1520407, EPI_ISL_1520408, EPI_ISL_1520409, EPI_ISL_1520410, EPI_ISL_1520411, EPI_ISL_1520412, EPI_ISL_1520413, EPI_ISL_1520414, EPI_ISL_1520415, EPI_ISL_1520416, EPI_ISL_1520417, EPI_ISL_1520418, EPI_ISL_1520419, EPI_ISL_1520420, EPI_ISL_1520421, EPI_ISL_1520422, EPI_ISL_1520423, EPI_ISL_1520424, EPI_ISL_1520425, EPI_ISL_1520426, EPI_ISL_1520427, EPI_ISL_1520428, EPI_ISL_1520429, EPI_ISL_1520430, EPI_ISL_1520431, EPI_ISL_1520432, EPI_ISL_1520433, EPI_ISL_1520434, EPI_ISL_1520435, EPI_ISL_1520436, EPI_ISL_1520437, EPI_ISL_1520438, EPI_ISL_1520439, EPI_ISL_1520440, EPI_ISL_1647381, EPI_ISL_1647382, EPI_ISL_1647383, EPI_ISL_1647384, EPI_ISL_1647385, EPI_ISL_1647386, EPI_ISL_1647387, EPI_ISL_1647388, EPI_ISL_1647389, EPI_ISL_1647390, EPI_ISL_1647391, EPI_ISL_1647392, EPI_ISL_1647393, EPI_ISL_1647394, EPI_ISL_1647395, EPI_ISL_1647396, EPI_ISL_1647397, EPI_ISL_1647398, EPI_ISL_1647399, EPI_ISL_1647400, EPI_ISL_1647401, EPI_ISL_1647402, EPI_ISL_1647403, EPI_ISL_1647404, EPI_ISL_1647405, EPI_ISL_1647406, EPI_ISL_1647407, EPI_ISL_1647408, EPI_ISL_1647409, EPI_ISL_1647410, EPI_ISL_1647411, EPI_ISL_1647412, EPI_ISL_1647413, EPI_ISL_1647414, EPI_ISL_1647415, EPI_ISL_1647416, EPI_ISL_1647417, EPI_ISL_1647418, EPI_ISL_1647419, EPI_ISL_1647420, EPI_ISL_1647421, EPI_ISL_1647422                                                                                                                                                                                                                                                                                                                                                                                                                                                                                                                                                                                                                                                                                                                                                                                                                                                                                                                                                                                                                                                                                                                                                                                                                                                                                                                                                                                                                                                                                                                                                                                                                                                                                                                                                                                                                                                                                                                                                                                                                                                                                                                                                                                                                                                                                                                                                                                                                                                                                                                                                                                                                                                                                                                                                                                                                                                                                                                                                                                                                                                              | Respiratory Virus Unit, National Infection Service, Public Health England | National Infection Service, Public Health England                                                 | Zambon M, Talts T, Ellis J, Miah S, Platt S                                                                                                                                                    |
| EPI_ISL_1647456, EPI_ISL_1647457, EPI_ISL_1647458, EPI_ISL_1647459, EPI_ISL_1647460, EPI_ISL_1647461, EPI_ISL_1647462, EPI_ISL_1647463, EPI_ISL_1647464, EPI_ISL_1647465, EPI_ISL_1647466, EPI_ISL_1647467, EPI_ISL_1647468, EPI_ISL_1647469, EPI_ISL_1647470, EPI_ISL_1647471, EPI_ISL_1647472, EPI_ISL_1647473, EPI_ISL_1647474, EPI_ISL_1647475, EPI_ISL_1647476, EPI_ISL_1647477, EPI_ISL_1647478, EPI_ISL_1647479, EPI_ISL_1647480, EPI_ISL_1647481, EPI_ISL_1647482, EPI_ISL_1647483, EPI_ISL_1647484, EPI_ISL_1647485, EPI_ISL_1647486, EPI_ISL_1647487, EPI_ISL_1647488, EPI_ISL_1647489                                                                                                                                                                                                                                                                                                                                                                                                                                                                                                                                                                                                                                                                                                                                                                                                                                                                                                                                                                                                                                                                                                                                                                                                                                                                                                                                                                                                                                                                                                                                                                                                                                                                                                                                                                                                                                                                                                                                                                                                                                                                                                                                                                                                                                                                                                                                                                                                                                                                                                                                                                                                                                                                                                                                                                                                                                                                                                                                                                                                                                                                                                                                                                                                                                                                                                                                                                                                                                                                                                                                                                                                                                                                                                                                                                                                                                                                                                                                                                                                                                                                                                                                                                                                                                                                  | Instituto Nacional de Saúde                                               | WHO Influenza Centre for Reference and Research on Influenza                                      | Angela Todd, Yi-Mo Deng, Almiró Rogerio Tivane, Naomi Komadina                                                                                                                                 |
| EPI_ISL_1647490, EPI_ISL_1647491, EPI_ISL_1647492, EPI_ISL_1647493, EPI_ISL_1647494, EPI_ISL_1647495, EPI_ISL_1647496, EPI_ISL_1647497, EPI_ISL_1647498, EPI_ISL_1647499, EPI_ISL_1647500, EPI_ISL_1647501, EPI_ISL_1647502, EPI_ISL_1647503, EPI_ISL_1647504, EPI_ISL_1647505, EPI_ISL_1647506, EPI_ISL_1647507, EPI_ISL_1647508, EPI_ISL_1647509, EPI_ISL_1647510, EPI_ISL_1647511, EPI_ISL_1647512, EPI_ISL_1647513, EPI_ISL_1647514, EPI_ISL_1647515, EPI_ISL_1647516, EPI_ISL_1647517, EPI_ISL_1647518, EPI_ISL_1647519, EPI_ISL_1647520, EPI_ISL_1647521, EPI_ISL_1647522, EPI_ISL_1647523, EPI_ISL_1647524, EPI_ISL_1647525, EPI_ISL_1647526, EPI_ISL_1647527, EPI_ISL_1647528, EPI_ISL_1647529, EPI_ISL_1647530, EPI_ISL_1647531, EPI_ISL_1647532, EPI_ISL_1647533, EPI_ISL_1647534, EPI_ISL_1647535, EPI_ISL_1647536, EPI_ISL_1647537, EPI_ISL_1647538, EPI_ISL_1647539, EPI_ISL_1647540, EPI_ISL_1647541, EPI_ISL_1647542, EPI_ISL_1647543, EPI_ISL_1647544, EPI_ISL_1647545, EPI_ISL_1647546, EPI_ISL_1647547, EPI_ISL_1647548, EPI_ISL_1647549, EPI_ISL_1647550, EPI_ISL_1647551, EPI_ISL_1647552, EPI_ISL_1647553, EPI_ISL_1647554, EPI_ISL_1647555, EPI_ISL_1647556, EPI_ISL_1647557, EPI_ISL_1647558, EPI_ISL_1647559, EPI_ISL_1647560, EPI_ISL_1647561, EPI_ISL_1647562, EPI_ISL_1647563, EPI_ISL_1647564, EPI_ISL_1647565, EPI_ISL_1647566, EPI_ISL_1647567, EPI_ISL_1647568, EPI_ISL_1647569, EPI_ISL_1647570, EPI_ISL_1647571, EPI_ISL_1647572, EPI_ISL_1647573, EPI_ISL_1647574, EPI_ISL_1647575, EPI_ISL_1647576, EPI_ISL_1647577, EPI_ISL_1647578, EPI_ISL_1647579, EPI_ISL_1647580, EPI_ISL_1647581, EPI_ISL_1647582, EPI_ISL_1647583, EPI_ISL_1647584, EPI_ISL_1647585, EPI_ISL_1647586, EPI_ISL_1647587, EPI_ISL_1647588, EPI_ISL_1647589, EPI_ISL_1647590, EPI_ISL_1647591, EPI_ISL_1647592, EPI_ISL_1647593, EPI_ISL_1647594, EPI_ISL_1647595, EPI_ISL_1647596, EPI_ISL_1647597, EPI_ISL_1647598, EPI_ISL_1647599, EPI_ISL_1647600                                                                                                                                                                                                                                                                                                                                                                                                                                                                                                                                                                                                                                                                                                                                                                                                                                                                                                                                                                                                                                                                                                                                                                                                                                                                                                                                                                                                                                                                                                                                                                                                                                                                                                                                                                                                                                                                                                                                                                                                                                                                                                                                                                                                                                                                                                                                                                                                                                                                                                                                                                                                                                                                                                                                                                                                                                                                                                     | Respiratory Virus Unit, National Infection Service, Public Health England | National Infection Service, Public Health England                                                 | Zambon M, Talts T, Ellis J, Miah S, Platt S                                                                                                                                                    |
| EPI_ISL_1653937                                                                                                                                                                                                                                                                                                                                                                                                                                                                                                                                                                                                                                                                                                                                                                                                                                                                                                                                                                                                                                                                                                                                                                                                                                                                                                                                                                                                                                                                                                                                                                                                                                                                                                                                                                                                                                                                                                                                                                                                                                                                                                                                                                                                                                                                                                                                                                                                                                                                                                                                                                                                                                                                                                                                                                                                                                                                                                                                                                                                                                                                                                                                                                                                                                                                                                                                                                                                                                                                                                                                                                                                                                                                                                                                                                                                                                                                                                                                                                                                                                                                                                                                                                                                                                                                                                                                                                                                                                                                                                                                                                                                                                                                                                                                                                                                                                                   | Royal Children's Hospital                                                 | WHO Influenza Centre for Reference and Research on Influenza                                      | Angela Todd, Yi-Mo Deng, Annette Alafaci, Naomi Komadina                                                                                                                                       |
| EPI_ISL_1653938, EPI_ISL_1653939                                                                                                                                                                                                                                                                                                                                                                                                                                                                                                                                                                                                                                                                                                                                                                                                                                                                                                                                                                                                                                                                                                                                                                                                                                                                                                                                                                                                                                                                                                                                                                                                                                                                                                                                                                                                                                                                                                                                                                                                                                                                                                                                                                                                                                                                                                                                                                                                                                                                                                                                                                                                                                                                                                                                                                                                                                                                                                                                                                                                                                                                                                                                                                                                                                                                                                                                                                                                                                                                                                                                                                                                                                                                                                                                                                                                                                                                                                                                                                                                                                                                                                                                                                                                                                                                                                                                                                                                                                                                                                                                                                                                                                                                                                                                                                                                                                  | Royal Children's Hospital                                                 | WHO Influenza Centre for Reference and Research on Influenza                                      | Jean Moselen, Yi-Mo Deng, Annette Alafaci, Naomi Komadina                                                                                                                                      |
| EPI_ISL_1653940                                                                                                                                                                                                                                                                                                                                                                                                                                                                                                                                                                                                                                                                                                                                                                                                                                                                                                                                                                                                                                                                                                                                                                                                                                                                                                                                                                                                                                                                                                                                                                                                                                                                                                                                                                                                                                                                                                                                                                                                                                                                                                                                                                                                                                                                                                                                                                                                                                                                                                                                                                                                                                                                                                                                                                                                                                                                                                                                                                                                                                                                                                                                                                                                                                                                                                                                                                                                                                                                                                                                                                                                                                                                                                                                                                                                                                                                                                                                                                                                                                                                                                                                                                                                                                                                                                                                                                                                                                                                                                                                                                                                                                                                                                                                                                                                                                                   | Royal Children's Hospital                                                 | WHO Influenza Centre for Reference and Research on Influenza                                      | Angela Todd, Yi-Mo Deng, Annette Alafaci, Naomi Komadina                                                                                                                                       |
| EPI_ISL_1653941, EPI_ISL_1653942                                                                                                                                                                                                                                                                                                                                                                                                                                                                                                                                                                                                                                                                                                                                                                                                                                                                                                                                                                                                                                                                                                                                                                                                                                                                                                                                                                                                                                                                                                                                                                                                                                                                                                                                                                                                                                                                                                                                                                                                                                                                                                                                                                                                                                                                                                                                                                                                                                                                                                                                                                                                                                                                                                                                                                                                                                                                                                                                                                                                                                                                                                                                                                                                                                                                                                                                                                                                                                                                                                                                                                                                                                                                                                                                                                                                                                                                                                                                                                                                                                                                                                                                                                                                                                                                                                                                                                                                                                                                                                                                                                                                                                                                                                                                                                                                                                  | Royal Children's Hospital                                                 | WHO Influenza Centre for Reference and Research on Influenza                                      | Jean Moselen, Yi-Mo Deng, Annette Alafaci, Naomi Komadina                                                                                                                                      |
| EPI_ISL_1653943                                                                                                                                                                                                                                                                                                                                                                                                                                                                                                                                                                                                                                                                                                                                                                                                                                                                                                                                                                                                                                                                                                                                                                                                                                                                                                                                                                                                                                                                                                                                                                                                                                                                                                                                                                                                                                                                                                                                                                                                                                                                                                                                                                                                                                                                                                                                                                                                                                                                                                                                                                                                                                                                                                                                                                                                                                                                                                                                                                                                                                                                                                                                                                                                                                                                                                                                                                                                                                                                                                                                                                                                                                                                                                                                                                                                                                                                                                                                                                                                                                                                                                                                                                                                                                                                                                                                                                                                                                                                                                                                                                                                                                                                                                                                                                                                                                                   | Royal Children's Hospital                                                 | WHO Influenza Centre for Reference and Research on Influenza                                      | Angela Todd, Yi-Mo Deng, Annette Alafaci, Naomi Komadina                                                                                                                                       |
| EPI_ISL_1653944                                                                                                                                                                                                                                                                                                                                                                                                                                                                                                                                                                                                                                                                                                                                                                                                                                                                                                                                                                                                                                                                                                                                                                                                                                                                                                                                                                                                                                                                                                                                                                                                                                                                                                                                                                                                                                                                                                                                                                                                                                                                                                                                                                                                                                                                                                                                                                                                                                                                                                                                                                                                                                                                                                                                                                                                                                                                                                                                                                                                                                                                                                                                                                                                                                                                                                                                                                                                                                                                                                                                                                                                                                                                                                                                                                                                                                                                                                                                                                                                                                                                                                                                                                                                                                                                                                                                                                                                                                                                                                                                                                                                                                                                                                                                                                                                                                                   | Royal Children's Hospital                                                 | WHO Influenza Centre for Reference and Research on Influenza                                      | Jean Moselen, Yi-Mo Deng, Annette Alafaci, Naomi Komadina                                                                                                                                      |
| EPI_ISL_1653945                                                                                                                                                                                                                                                                                                                                                                                                                                                                                                                                                                                                                                                                                                                                                                                                                                                                                                                                                                                                                                                                                                                                                                                                                                                                                                                                                                                                                                                                                                                                                                                                                                                                                                                                                                                                                                                                                                                                                                                                                                                                                                                                                                                                                                                                                                                                                                                                                                                                                                                                                                                                                                                                                                                                                                                                                                                                                                                                                                                                                                                                                                                                                                                                                                                                                                                                                                                                                                                                                                                                                                                                                                                                                                                                                                                                                                                                                                                                                                                                                                                                                                                                                                                                                                                                                                                                                                                                                                                                                                                                                                                                                                                                                                                                                                                                                                                   | Royal Children's Hospital                                                 | WHO Influenza Centre for Reference and Research on Influenza                                      | Angela Todd, Yi-Mo Deng, Annette Alafaci, Naomi Komadina                                                                                                                                       |
| EPI_ISL_1653946                                                                                                                                                                                                                                                                                                                                                                                                                                                                                                                                                                                                                                                                                                                                                                                                                                                                                                                                                                                                                                                                                                                                                                                                                                                                                                                                                                                                                                                                                                                                                                                                                                                                                                                                                                                                                                                                                                                                                                                                                                                                                                                                                                                                                                                                                                                                                                                                                                                                                                                                                                                                                                                                                                                                                                                                                                                                                                                                                                                                                                                                                                                                                                                                                                                                                                                                                                                                                                                                                                                                                                                                                                                                                                                                                                                                                                                                                                                                                                                                                                                                                                                                                                                                                                                                                                                                                                                                                                                                                                                                                                                                                                                                                                                                                                                                                                                   | Royal Children's Hospital                                                 | WHO Influenza Centre for Reference and Research on Influenza                                      | Jean Moselen, Yi-Mo Deng, Annette Alafaci, Naomi Komadina                                                                                                                                      |
| EPI_ISL_1653947                                                                                                                                                                                                                                                                                                                                                                                                                                                                                                                                                                                                                                                                                                                                                                                                                                                                                                                                                                                                                                                                                                                                                                                                                                                                                                                                                                                                                                                                                                                                                                                                                                                                                                                                                                                                                                                                                                                                                                                                                                                                                                                                                                                                                                                                                                                                                                                                                                                                                                                                                                                                                                                                                                                                                                                                                                                                                                                                                                                                                                                                                                                                                                                                                                                                                                                                                                                                                                                                                                                                                                                                                                                                                                                                                                                                                                                                                                                                                                                                                                                                                                                                                                                                                                                                                                                                                                                                                                                                                                                                                                                                                                                                                                                                                                                                                                                   | Royal Children's Hospital                                                 | WHO Influenza Centre for Reference and Research on Influenza                                      | Angela Todd, Yi-Mo Deng, Annette Alafaci, Naomi Komadina                                                                                                                                       |
| EPI_ISL_1653948                                                                                                                                                                                                                                                                                                                                                                                                                                                                                                                                                                                                                                                                                                                                                                                                                                                                                                                                                                                                                                                                                                                                                                                                                                                                                                                                                                                                                                                                                                                                                                                                                                                                                                                                                                                                                                                                                                                                                                                                                                                                                                                                                                                                                                                                                                                                                                                                                                                                                                                                                                                                                                                                                                                                                                                                                                                                                                                                                                                                                                                                                                                                                                                                                                                                                                                                                                                                                                                                                                                                                                                                                                                                                                                                                                                                                                                                                                                                                                                                                                                                                                                                                                                                                                                                                                                                                                                                                                                                                                                                                                                                                                                                                                                                                                                                                                                   | Royal Children's Hospital                                                 | WHO Influenza Centre for Reference and Research on Influenza                                      | Jean Moselen, Yi-Mo Deng, Annette Alafaci, Naomi Komadina                                                                                                                                      |
| EPI_ISL_1653949, EPI_ISL_1653950, EPI_ISL_1653951, EPI_ISL_1653952, EPI_ISL_1653953, EPI_ISL_1653954, EPI_ISL_1653955, EPI_ISL_1653956, EPI_ISL_1653957, EPI_ISL_1653958, EPI_ISL_1653959, EPI_ISL_1653960, EPI_ISL_1653961, EPI_ISL_1653962, EPI_ISL_1653963, EPI_ISL_1653964, EPI_ISL_1653965, EPI_ISL_1653966, EPI_ISL_1653967, EPI_ISL_1653968, EPI_ISL_1653969, EPI_ISL_1653970, EPI_ISL_1653971, EPI_ISL_1653972, EPI_ISL_1653973, EPI_ISL_1653974, EPI_ISL_1653975, EPI_ISL_1653976, EPI_ISL_1653977, EPI_ISL_1653978, EPI_ISL_1653979, EPI_ISL_1653980, EPI_ISL_1653981, EPI_ISL_1653982, EPI_ISL_1653983, EPI_ISL_1653984, EPI_ISL_1653985, EPI_ISL_1653986, EPI_ISL_1653987, EPI_ISL_1653988, EPI_ISL_1653989, EPI_ISL_1653990, EPI_ISL_1653991, EPI_ISL_1653992, EPI_ISL_1653993, EPI_ISL_1653994, EPI_ISL_1653995, EPI_ISL_1653996, EPI_ISL_1653997, EPI_ISL_1653998, EPI_ISL_1653999                                                                                                                                                                                                                                                                                                                                                                                                                                                                                                                                                                                                                                                                                                                                                                                                                                                                                                                                                                                                                                                                                                                                                                                                                                                                                                                                                                                                                                                                                                                                                                                                                                                                                                                                                                                                                                                                                                                                                                                                                                                                                                                                                                                                                                                                                                                                                                                                                                                                                                                                                                                                                                                                                                                                                                                                                                                                                                                                                                                                                                                                                                                                                                                                                                                                                                                                                                                                                                                                                                                                                                                                                                                                                                                                                                                                                                                                                                                                                                 | Royal Children's Hospital                                                 | WHO Influenza Centre for Reference and Research on Influenza                                      | Angela Todd, Yi-Mo Deng, Annette Alafaci, Naomi Komadina                                                                                                                                       |

|                                                                                                                                                                                                                                                                                                                                                                                                                                                                                                                                                                                                                                                                                                                                                                                                                                                                                                                                                                                                                                                                                                                                                 |                                                                                                                                    |                                                                                                                                    |                                                                                                                                              |
|-------------------------------------------------------------------------------------------------------------------------------------------------------------------------------------------------------------------------------------------------------------------------------------------------------------------------------------------------------------------------------------------------------------------------------------------------------------------------------------------------------------------------------------------------------------------------------------------------------------------------------------------------------------------------------------------------------------------------------------------------------------------------------------------------------------------------------------------------------------------------------------------------------------------------------------------------------------------------------------------------------------------------------------------------------------------------------------------------------------------------------------------------|------------------------------------------------------------------------------------------------------------------------------------|------------------------------------------------------------------------------------------------------------------------------------|----------------------------------------------------------------------------------------------------------------------------------------------|
| EPI_ISL_1760383, EPI_ISL_1760384, EPI_ISL_1760385, EPI_ISL_1760386, EPI_ISL_1760387, EPI_ISL_1760388, EPI_ISL_1760389, EPI_ISL_1760390, EPI_ISL_1760391, EPI_ISL_1760392, EPI_ISL_1760393, EPI_ISL_1760394, EPI_ISL_1760395, EPI_ISL_1760396, EPI_ISL_1760397, EPI_ISL_1760398, EPI_ISL_1760399, EPI_ISL_1760400, EPI_ISL_1760401, EPI_ISL_1760402, EPI_ISL_1760403, EPI_ISL_1760404, EPI_ISL_1760405, EPI_ISL_1760406, EPI_ISL_1760407, EPI_ISL_1760408, EPI_ISL_1760409, EPI_ISL_1760410, EPI_ISL_1760411, EPI_ISL_1760412, EPI_ISL_1760413, EPI_ISL_1760414, EPI_ISL_1760415, EPI_ISL_1760416, EPI_ISL_1760417, EPI_ISL_1760418, EPI_ISL_1760419, EPI_ISL_1760420, EPI_ISL_1760421, EPI_ISL_1760422, EPI_ISL_1760423, EPI_ISL_1760424, EPI_ISL_1760425, EPI_ISL_1760426, EPI_ISL_1760427, EPI_ISL_1760428, EPI_ISL_1760429, EPI_ISL_1760430, EPI_ISL_1760431, EPI_ISL_1760432, EPI_ISL_1760433, EPI_ISL_1760434, EPI_ISL_1760435, EPI_ISL_1760436, EPI_ISL_1760437, EPI_ISL_1760438, EPI_ISL_1760439, EPI_ISL_1760440, EPI_ISL_1760441, EPI_ISL_1760442, EPI_ISL_1760443, EPI_ISL_1760444                                                    | Royal Children's Hospital, 50 Flemington Rd., Park                                                                                 | WHO Influenza Centre for Reference and Research on Influenza                                                                       | Angela Todd, Yi-Mo Deng, Annette Alafaci, Naomi Komadina                                                                                     |
| see above                                                                                                                                                                                                                                                                                                                                                                                                                                                                                                                                                                                                                                                                                                                                                                                                                                                                                                                                                                                                                                                                                                                                       |                                                                                                                                    |                                                                                                                                    |                                                                                                                                              |
| EPI_ISL_1834083, EPI_ISL_1834084, EPI_ISL_1834085, EPI_ISL_1834086, EPI_ISL_1834087, EPI_ISL_1834088, EPI_ISL_1834089, EPI_ISL_1834090, EPI_ISL_1834091, EPI_ISL_1834092, EPI_ISL_1834093, EPI_ISL_1834094, EPI_ISL_1834095, EPI_ISL_1834096, EPI_ISL_1834097, EPI_ISL_1834098, EPI_ISL_1834099, EPI_ISL_1834100, EPI_ISL_1834101, EPI_ISL_1834102, EPI_ISL_1834103, EPI_ISL_1834104, EPI_ISL_1834105, EPI_ISL_1834106, EPI_ISL_1834107, EPI_ISL_1834108, EPI_ISL_1834109, EPI_ISL_1834110, EPI_ISL_1834112, EPI_ISL_1834113, EPI_ISL_1834114, EPI_ISL_1834115, EPI_ISL_1834116, EPI_ISL_1834117, EPI_ISL_1834118, EPI_ISL_1834119, EPI_ISL_1834120, EPI_ISL_1834121, EPI_ISL_1834123, EPI_ISL_1834124, EPI_ISL_1834125, EPI_ISL_1834126, EPI_ISL_1834127, EPI_ISL_1834128, EPI_ISL_1834129, EPI_ISL_1834130, EPI_ISL_1834131, EPI_ISL_1834132, EPI_ISL_1834133, EPI_ISL_1834134, EPI_ISL_1834135, EPI_ISL_1834136, EPI_ISL_1834137, EPI_ISL_1834138, EPI_ISL_1834139, EPI_ISL_1834140, EPI_ISL_1834141, EPI_ISL_1834142, EPI_ISL_1834143, EPI_ISL_1834144, EPI_ISL_1834145, EPI_ISL_1834146, EPI_ISL_1834147, EPI_ISL_1834148, EPI_ISL_1834149 | Royal Children's Hospital                                                                                                          | WHO Influenza Centre for Reference and Research on Influenza                                                                       | Angela Todd, Yi-Mo Deng, Annette Alafaci, Naomi Komadina                                                                                     |
| see above                                                                                                                                                                                                                                                                                                                                                                                                                                                                                                                                                                                                                                                                                                                                                                                                                                                                                                                                                                                                                                                                                                                                       |                                                                                                                                    |                                                                                                                                    |                                                                                                                                              |
| EPI_ISL_1834150, EPI_ISL_1834151, EPI_ISL_1834152, EPI_ISL_1834153, EPI_ISL_1834154, EPI_ISL_1834155, EPI_ISL_1834158, EPI_ISL_1834159, EPI_ISL_1834160, EPI_ISL_1834161, EPI_ISL_1834162, EPI_ISL_1834163, EPI_ISL_1834164, EPI_ISL_1834165, EPI_ISL_1834166, EPI_ISL_1834167, EPI_ISL_1834168, EPI_ISL_1834169, EPI_ISL_1834170, EPI_ISL_1834171, EPI_ISL_1834172, EPI_ISL_1834173, EPI_ISL_1834174, EPI_ISL_1834175, EPI_ISL_1834176, EPI_ISL_1834177, EPI_ISL_1834178, EPI_ISL_1834179, EPI_ISL_1834180, EPI_ISL_1834181, EPI_ISL_1834182, EPI_ISL_1834183, EPI_ISL_1834184                                                                                                                                                                                                                                                                                                                                                                                                                                                                                                                                                                 | Respiratory Virus Unit, National Infection Service, Public Health England                                                          | National Infection Service, Public Health England                                                                                  | Zambon M, Talts T, Ellis J, Miah S, Platt S                                                                                                  |
| see above                                                                                                                                                                                                                                                                                                                                                                                                                                                                                                                                                                                                                                                                                                                                                                                                                                                                                                                                                                                                                                                                                                                                       |                                                                                                                                    |                                                                                                                                    |                                                                                                                                              |
| EPI_ISL_2156812, EPI_ISL_2156813, EPI_ISL_2156814, EPI_ISL_2156815, EPI_ISL_2156816, EPI_ISL_2156817, EPI_ISL_2156818, EPI_ISL_2156819, EPI_ISL_2156820                                                                                                                                                                                                                                                                                                                                                                                                                                                                                                                                                                                                                                                                                                                                                                                                                                                                                                                                                                                         | Royal Children's Hospital                                                                                                          | WHO Influenza Centre for Reference and Research on Influenza                                                                       | Angela Todd, Yi-Mo Deng, Annette Alafaci, Naomi Komadina                                                                                     |
| EPI_ISL_2543761                                                                                                                                                                                                                                                                                                                                                                                                                                                                                                                                                                                                                                                                                                                                                                                                                                                                                                                                                                                                                                                                                                                                 | National Center for Communicable Diseases                                                                                          | WHO Collaborating Centre for Reference and Research on Influenza                                                                   | Xiaomin Dong, Darmaa Bardach, Yi-Mo Deng, Ammar Aziz, Naomi Komadina                                                                         |
| EPI_ISL_2543762                                                                                                                                                                                                                                                                                                                                                                                                                                                                                                                                                                                                                                                                                                                                                                                                                                                                                                                                                                                                                                                                                                                                 | Monash Medical Centre                                                                                                              | WHO Collaborating Centre for Reference and Research on Influenza                                                                   | Xiaomin Dong, Michelle Francis, Tony Korman, Yi-Mo Deng, Ammar Aziz, Naomi Komadina                                                          |
| EPI_ISL_2543763                                                                                                                                                                                                                                                                                                                                                                                                                                                                                                                                                                                                                                                                                                                                                                                                                                                                                                                                                                                                                                                                                                                                 | Royal Children's Hospital                                                                                                          | WHO Collaborating Centre for Reference and Research on Influenza                                                                   | Xiaomin Dong, Annette Alafaci, Yi-Mo Deng, Ammar Aziz, Naomi Komadina                                                                        |
| EPI_ISL_2543764, EPI_ISL_2543765, EPI_ISL_2543766, EPI_ISL_2543767, EPI_ISL_2543768, EPI_ISL_2543769, EPI_ISL_2543770, EPI_ISL_2543771, EPI_ISL_2543772, EPI_ISL_2543773, EPI_ISL_2543774, EPI_ISL_2543775, EPI_ISL_2543776, EPI_ISL_2543777, EPI_ISL_2543778, EPI_ISL_2543779, EPI_ISL_2543780, EPI_ISL_2543781                                                                                                                                                                                                                                                                                                                                                                                                                                                                                                                                                                                                                                                                                                                                                                                                                                | Monash Medical Centre                                                                                                              | WHO Collaborating Centre for Reference and Research on Influenza                                                                   | Xiaomin Dong, Michelle Francis, Tony Korman, Yi-Mo Deng, Ammar Aziz, Naomi Komadina                                                          |
| see above                                                                                                                                                                                                                                                                                                                                                                                                                                                                                                                                                                                                                                                                                                                                                                                                                                                                                                                                                                                                                                                                                                                                       |                                                                                                                                    |                                                                                                                                    |                                                                                                                                              |
| EPI_ISL_2543782, EPI_ISL_2543783, EPI_ISL_2543784, EPI_ISL_2543785, EPI_ISL_2543786, EPI_ISL_2543787, EPI_ISL_2543788, EPI_ISL_2543789, EPI_ISL_2543790, EPI_ISL_2543791, EPI_ISL_2543792, EPI_ISL_2543793, EPI_ISL_2543794, EPI_ISL_2543795, EPI_ISL_2543796, EPI_ISL_2543798, EPI_ISL_2543799, EPI_ISL_2543800, EPI_ISL_2543801, EPI_ISL_2543802, EPI_ISL_2543803, EPI_ISL_2543804, EPI_ISL_2543805, EPI_ISL_2543806, EPI_ISL_2543807, EPI_ISL_2543808, EPI_ISL_2543809, EPI_ISL_2543810                                                                                                                                                                                                                                                                                                                                                                                                                                                                                                                                                                                                                                                      | Royal Children's Hospital                                                                                                          | WHO Collaborating Centre for Reference and Research on Influenza                                                                   | Xiaomin Dong, Annette Alafaci, Yi-Mo Deng, Ammar Aziz, Naomi Komadina                                                                        |
| see above                                                                                                                                                                                                                                                                                                                                                                                                                                                                                                                                                                                                                                                                                                                                                                                                                                                                                                                                                                                                                                                                                                                                       |                                                                                                                                    |                                                                                                                                    |                                                                                                                                              |
| EPI_ISL_2543811, EPI_ISL_2543812, EPI_ISL_2543813, EPI_ISL_2543814, EPI_ISL_2543815, EPI_ISL_2543816, EPI_ISL_2543817, EPI_ISL_2543818, EPI_ISL_2543819, EPI_ISL_2543820, EPI_ISL_2543821, EPI_ISL_2543822, EPI_ISL_2543823, EPI_ISL_2543824, EPI_ISL_2543825, EPI_ISL_2543826                                                                                                                                                                                                                                                                                                                                                                                                                                                                                                                                                                                                                                                                                                                                                                                                                                                                  | Institut Pasteur de Cote d'Ivoire                                                                                                  | WHO Collaborating Centre for Reference and Research on Influenza                                                                   | Xiaomin Dong, Herve Kadio, Yi-Mo Deng, Ammar Aziz, Naomi Komadina                                                                            |
| see above                                                                                                                                                                                                                                                                                                                                                                                                                                                                                                                                                                                                                                                                                                                                                                                                                                                                                                                                                                                                                                                                                                                                       |                                                                                                                                    |                                                                                                                                    |                                                                                                                                              |
| EPI_ISL_2543827, EPI_ISL_2543828, EPI_ISL_2543829, EPI_ISL_2543830, EPI_ISL_2543831, EPI_ISL_2543832, EPI_ISL_2543833, EPI_ISL_2543834, EPI_ISL_2543835, EPI_ISL_2543836, EPI_ISL_2543837, EPI_ISL_2543838, EPI_ISL_2543839, EPI_ISL_2543840, EPI_ISL_2543841, EPI_ISL_2543842, EPI_ISL_2543843, EPI_ISL_2543844                                                                                                                                                                                                                                                                                                                                                                                                                                                                                                                                                                                                                                                                                                                                                                                                                                | National Center for Communicable Diseases                                                                                          | WHO Collaborating Centre for Reference and Research on Influenza                                                                   | Xiaomin Dong, Darmaa Bardach, Yi-Mo Deng, Ammar Aziz, Naomi Komadina                                                                         |
| see above                                                                                                                                                                                                                                                                                                                                                                                                                                                                                                                                                                                                                                                                                                                                                                                                                                                                                                                                                                                                                                                                                                                                       |                                                                                                                                    |                                                                                                                                    |                                                                                                                                              |
| EPI_ISL_2543845, EPI_ISL_2543846, EPI_ISL_2543847                                                                                                                                                                                                                                                                                                                                                                                                                                                                                                                                                                                                                                                                                                                                                                                                                                                                                                                                                                                                                                                                                               | NIC, National Institute of Health                                                                                                  | WHO Collaborating Centre for Reference and Research on Influenza                                                                   | Xiaomin Dong, Pilailuk Akkapaiboon Okada, Yi-Mo Deng, Ammar Aziz, Naomi Komadina                                                             |
| EPI_ISL_2543848                                                                                                                                                                                                                                                                                                                                                                                                                                                                                                                                                                                                                                                                                                                                                                                                                                                                                                                                                                                                                                                                                                                                 | Monash Medical Centre                                                                                                              | WHO Collaborating Centre for Reference and Research on Influenza                                                                   | Xiaomin Dong, Michelle Francis, Tony Korman, Yi-Mo Deng, Ammar Aziz, Naomi Komadina                                                          |
| EPI_ISL_2543849, EPI_ISL_2543850, EPI_ISL_2543851, EPI_ISL_2543852, EPI_ISL_2543853                                                                                                                                                                                                                                                                                                                                                                                                                                                                                                                                                                                                                                                                                                                                                                                                                                                                                                                                                                                                                                                             | Royal Children's Hospital                                                                                                          | WHO Collaborating Centre for Reference and Research on Influenza                                                                   | Xiaomin Dong, Annette Alafaci, Yi-Mo Deng, Ammar Aziz, Naomi Komadina                                                                        |
| EPI_ISL_2543854, EPI_ISL_2543855, EPI_ISL_2543856, EPI_ISL_2543857, EPI_ISL_2543858, EPI_ISL_2543859                                                                                                                                                                                                                                                                                                                                                                                                                                                                                                                                                                                                                                                                                                                                                                                                                                                                                                                                                                                                                                            | Institut Pasteur de Cote d'Ivoire                                                                                                  | WHO Collaborating Centre for Reference and Research on Influenza                                                                   | Xiaomin Dong, Herve Kadio, Yi-Mo Deng, Ammar Aziz, Naomi Komadina                                                                            |
| EPI_ISL_2543860, EPI_ISL_2543861, EPI_ISL_2543862, EPI_ISL_2543863, EPI_ISL_2543864, EPI_ISL_2543865, EPI_ISL_2543866, EPI_ISL_2543867, EPI_ISL_2543868, EPI_ISL_2543869, EPI_ISL_2543870, EPI_ISL_2543871, EPI_ISL_2543872, EPI_ISL_2543873, EPI_ISL_2543874, EPI_ISL_2543875, EPI_ISL_2543876, EPI_ISL_2543877, EPI_ISL_2543878, EPI_ISL_2543879, EPI_ISL_2543880, EPI_ISL_2543881, EPI_ISL_2543882, EPI_ISL_2543883, EPI_ISL_2543884, EPI_ISL_2543885, EPI_ISL_2543886, EPI_ISL_2543887, EPI_ISL_2543888, EPI_ISL_2543889                                                                                                                                                                                                                                                                                                                                                                                                                                                                                                                                                                                                                    | National Center for Communicable Diseases                                                                                          | WHO Collaborating Centre for Reference and Research on Influenza                                                                   | Xiaomin Dong, Darmaa Bardach, Yi-Mo Deng, Ammar Aziz, Naomi Komadina                                                                         |
| see above                                                                                                                                                                                                                                                                                                                                                                                                                                                                                                                                                                                                                                                                                                                                                                                                                                                                                                                                                                                                                                                                                                                                       |                                                                                                                                    |                                                                                                                                    |                                                                                                                                              |
| EPI_ISL_2543890                                                                                                                                                                                                                                                                                                                                                                                                                                                                                                                                                                                                                                                                                                                                                                                                                                                                                                                                                                                                                                                                                                                                 | NIC, National Institute of Health                                                                                                  | WHO Collaborating Centre for Reference and Research on Influenza                                                                   | Xiaomin Dong, Pilailuk Akkapaiboon Okada, Yi-Mo Deng, Ammar Aziz, Naomi Komadina                                                             |
| EPI_ISL_2543922                                                                                                                                                                                                                                                                                                                                                                                                                                                                                                                                                                                                                                                                                                                                                                                                                                                                                                                                                                                                                                                                                                                                 | KEMRI Wellcome Trust Research Programme                                                                                            | KEMRI Wellcome Trust Research Programme                                                                                            | Agoti,C.N., Otieno,J.R., Munywoki,P.K., Mwihuri,A.G., Cane,P.A., Nokes,D.J., Kellam,P. and Cotten,M.L.                                       |
| EPI_ISL_2543931                                                                                                                                                                                                                                                                                                                                                                                                                                                                                                                                                                                                                                                                                                                                                                                                                                                                                                                                                                                                                                                                                                                                 | Pathogen Diagnostic Center, Institut Pasteur de Shanghai, Chinese Academy of Sciences                                              | Pathogen Diagnostic Center, Institut Pasteur de Shanghai, Chinese Academy of Sciences                                              | Fu,X., He,Z., Lan,K., Zhang,C., Dong,W., Cheng,Y. and Hu,Y.                                                                                  |
| EPI_ISL_2543932                                                                                                                                                                                                                                                                                                                                                                                                                                                                                                                                                                                                                                                                                                                                                                                                                                                                                                                                                                                                                                                                                                                                 | Microbiology Department, The University of Hong Kong, Queen Mary Hospital, University Pathology Building                           | Microbiology Department, The University of Hong Kong, Queen Mary Hospital, University Pathology Building                           | Zhang,K., He,J., Cheng,Z., Zhou,J., Bose,M., Henrickson,K.J. and Zheng,B.                                                                    |
| EPI_ISL_2543933                                                                                                                                                                                                                                                                                                                                                                                                                                                                                                                                                                                                                                                                                                                                                                                                                                                                                                                                                                                                                                                                                                                                 | Influenza Group, National Institute of Virology                                                                                    | Influenza Group, National Institute of Virology                                                                                    | Choudhary,M.L., Wadhwa,B., Jadhav,S.M., Chadha,M.S. and Mourya,D.T.                                                                          |
| EPI_ISL_2543934, EPI_ISL_2543935, EPI_ISL_2543936                                                                                                                                                                                                                                                                                                                                                                                                                                                                                                                                                                                                                                                                                                                                                                                                                                                                                                                                                                                                                                                                                               | J. Craig Venter Institute                                                                                                          | J. Craig Venter Institute                                                                                                          | Shabman,R., Das,S.R., Puri,V., Fedorova,N., Amedeo,P., Williams,M., Shrivastava,S. and Halasa,N.                                             |
| EPI_ISL_2543937, EPI_ISL_2543938, EPI_ISL_2543939, EPI_ISL_2543940                                                                                                                                                                                                                                                                                                                                                                                                                                                                                                                                                                                                                                                                                                                                                                                                                                                                                                                                                                                                                                                                              | Virology, Graduate School of Medicine, Tohoku University                                                                           | Virology, Graduate School of Medicine, Tohoku University                                                                           | Malasao,R., Furuse,Y., Okamoto,M., Daplat,C., Saito,M., Saito-Obata,M., Tamaki,R., Segubre-Mercado,E., Lupisan,S. and Oshitani,H.            |
| EPI_ISL_2543941                                                                                                                                                                                                                                                                                                                                                                                                                                                                                                                                                                                                                                                                                                                                                                                                                                                                                                                                                                                                                                                                                                                                 | Division of Biosafety Evaluation and Control, Korea National Institute of Health, Korea Centers for Disease Control and Prevention | Division of Biosafety Evaluation and Control, Korea National Institute of Health, Korea Centers for Disease Control and Prevention | Yun,M.-R., Lee,W.-J., Kim,A.-R., Lee,H.S., Kim,K., Kim,S.S., Kim,Y.-J. and Kim,D.-W.                                                         |
| EPI_ISL_2543943                                                                                                                                                                                                                                                                                                                                                                                                                                                                                                                                                                                                                                                                                                                                                                                                                                                                                                                                                                                                                                                                                                                                 | Emerging Viral Infections, Oxford University Clinical Research                                                                     | Emerging Viral Infections, Oxford University Clinical Research                                                                     | Do,LA.H., Wilm,A., van Doorn,H.R., Lam,H.M., Sukumar,R., Tran,A.T., Nguyen,B.H., Tran,T.T.L., Tran,Q.H., Vo,Q.B., Tran Dac,N.A., Trinh,H.N., |

|                                                                                                                                                                                                                             | Unit                                                            | Unit                                                            |                                                                                                                                                                                                                                                                                                                                                                                  |
|-----------------------------------------------------------------------------------------------------------------------------------------------------------------------------------------------------------------------------|-----------------------------------------------------------------|-----------------------------------------------------------------|----------------------------------------------------------------------------------------------------------------------------------------------------------------------------------------------------------------------------------------------------------------------------------------------------------------------------------------------------------------------------------|
| EPI_ISL_2543949                                                                                                                                                                                                             | Medical Microbiology, University Medical Center Utrecht         | Medical Microbiology, University Medical Center Utrecht         | Nguyen,t.T.H., Le Binh,B.T., Le,K., Nguyen,M.T., Thai,Q.T., Vo,T.V., Ngo,N.Q.M., Dang,t.K.H., Cao,N.H., Tran,T.V., Ho,L.V., Farrar,J., de Jong,M.D., Chen,S., Nagarajan,N., Bryant,J.E. and Hibberd,M.L.                                                                                                                                                                         |
| EPI_ISL_2543952, EPI_ISL_2543953, EPI_ISL_2543954                                                                                                                                                                           | J. Craig Venter Institute                                       | J. Craig Venter Institute                                       | Tan,L., Lemey,P., Viveen,M. and Coenjaerts,F.E.J.                                                                                                                                                                                                                                                                                                                                |
| EPI_ISL_2543955                                                                                                                                                                                                             | Medical Microbiology, University Medical Center Utrecht         | Medical Microbiology, University Medical Center Utrecht         | Lorenzi,H., Town,C., Halpin,R., Bera,J., Ransier,A., Fedorova,N., Stockwell,T., Amedeo,P., Appalla,L., Bishop,B., Edworthy,P., Gupta,N., Hoover,J., Katzel,D., Li,K., Schobel,S., Shrivastava,S., Thovarai,V., Wang,S., Rebuffo-Scheer,C., Fan,J., He,J., Kehl,S.C., Lederboer,N., Jurgens,L.A., Bose,M.E., Beck,E.T., Kumar,S., Gerna,G., Wentworth,D.E. and Henrickson,K.J.    |
| EPI_ISL_2543956                                                                                                                                                                                                             | Medical Microbiology, University Medical Center Utrecht         | Medical Microbiology, University Medical Center Utrecht         | Tan,L., Lemey,P., Viveen,M. and Coenjaerts,F.                                                                                                                                                                                                                                                                                                                                    |
| EPI_ISL_2543957                                                                                                                                                                                                             | Medical Microbiology, University Medical Center Utrecht         | Medical Microbiology, University Medical Center Utrecht         | Tan,L., Lemey,P., Viveen,M. and Coenjaerts,F.E.J.                                                                                                                                                                                                                                                                                                                                |
| EPI_ISL_2543958, EPI_ISL_2543959, EPI_ISL_2543960                                                                                                                                                                           | Medical Microbiology, University Medical Center Utrecht         | Medical Microbiology, University Medical Center Utrecht         | Tan,L., Lemey,P., Viveen,M. and Coenjaerts,F.                                                                                                                                                                                                                                                                                                                                    |
| EPI_ISL_2543967                                                                                                                                                                                                             | J. Craig Venter Institute                                       | J. Craig Venter Institute                                       | Tan,L., Lemey,P., Viveen,M. and Coenjaerts,F.E.J.                                                                                                                                                                                                                                                                                                                                |
| EPI_ISL_2543969                                                                                                                                                                                                             | Mirus Bio Corporation                                           | Mirus Bio Corporation                                           | Lorenzi,H., Town,C., Halpin,R., Bera,J., Ransier,A., Fedorova,N., Stockwell,T., Amedeo,P., Appalla,L., Bishop,B., Edworthy,P., Gupta,N., Hoover,J., Katzel,D., Li,K., Schobel,S., Shrivastava,S., Thovarai,V., Wang,S., Rebuffo-Scheer,C., Fan,J., He,J., Kehl,S.C., Lederboer,N., Jurgens,L.A., Bose,M.E., Beck,E.T., Kumar,S., Noyola,D.E., Wentworth,D.E. and Henrickson,K.J. |
| EPI_ISL_2543970, EPI_ISL_2543971, EPI_ISL_2543972, EPI_ISL_2543973, EPI_ISL_2543974, EPI_ISL_2543975, EPI_ISL_2543976, EPI_ISL_2543977, EPI_ISL_2543978, EPI_ISL_2543979, EPI_ISL_2543980, EPI_ISL_2543981, EPI_ISL_2543982 |                                                                 |                                                                 | Brazas,R.M.                                                                                                                                                                                                                                                                                                                                                                      |
| see above                                                                                                                                                                                                                   | J. Craig Venter Institute                                       | J. Craig Venter Institute                                       | Das,S.R., Halpin,R.A., Shiels,M., Puri,V., Akopov,A., Fedorova,N., Stockwell,T., Amedeo,P., Bishop,B., Katzel,D., Schobel,S., Shrivastava,S. and Hartert,T.                                                                                                                                                                                                                      |
| EPI_ISL_2543983                                                                                                                                                                                                             | J. Craig Venter Institute                                       | J. Craig Venter Institute                                       | Shabman,R., Das,S.R., Shiels,M., Fedorova,N., Puri,V., Shrivastava,S., Amedeo,P., Hu,L., Durbin,A., Rocchi,I., Williams,T. and Hartert,T.                                                                                                                                                                                                                                        |
| EPI_ISL_2543984, EPI_ISL_2543985, EPI_ISL_2543986, EPI_ISL_2543987, EPI_ISL_2543988, EPI_ISL_2543989, EPI_ISL_2543990                                                                                                       | Lab Medicine, UW                                                | Lab Medicine, UW                                                | Greninger,A.L., Makhosun,N., Kuypers,J.M., Shean,R.C. and Jerome,K.R.                                                                                                                                                                                                                                                                                                            |
| EPI_ISL_2543991, EPI_ISL_2543992, EPI_ISL_2543993, EPI_ISL_2543995                                                                                                                                                          | J. Craig Venter Institute                                       | J. Craig Venter Institute                                       | Das,S.R., Halpin,R.A., Puri,V., Akopov,A., Fedorova,N., Tsitirin,T., Stockwell,T., Amedeo,P., Bishop,B., Gupta,N., Hoover,J., Katzel,D., Schobel,S., Shrivastava,S., Wentworth,D.E. and Caserta,M.                                                                                                                                                                               |
| EPI_ISL_2543996, EPI_ISL_2543997, EPI_ISL_2543998, EPI_ISL_2543999, EPI_ISL_2544000, EPI_ISL_2544001, EPI_ISL_2544002, EPI_ISL_2544003                                                                                      | J. Craig Venter Institute                                       | J. Craig Venter Institute                                       | Das,S.R., Halpin,R.A., Puri,V., Akopov,A., Fedorova,N., Stockwell,T., Amedeo,P., Bishop,B., Katzel,D., Schobel,S., Shrivastava,S., Wentworth,D.E. and Caserta,M.                                                                                                                                                                                                                 |
| EPI_ISL_2544004, EPI_ISL_2544005, EPI_ISL_2544006, EPI_ISL_2544007, EPI_ISL_2544008, EPI_ISL_2544009, EPI_ISL_2544010, EPI_ISL_2544011, EPI_ISL_2544012, EPI_ISL_2544013                                                    | J. Craig Venter Institute                                       | J. Craig Venter Institute                                       | Das,S.R., Halpin,R.A., Puri,V., Akopov,A., Fedorova,N., Stockwell,T., Amedeo,P., Bishop,B., Katzel,D., Schobel,S., Shrivastava,S., Hall,C.B., Tesini,B.L., Schnabel,K.C., Walsh,E.E. and Caserta,M.                                                                                                                                                                              |
| EPI_ISL_2544014, EPI_ISL_2544015, EPI_ISL_2544016, EPI_ISL_2544017, EPI_ISL_2544018, EPI_ISL_2544019                                                                                                                        | J. Craig Venter Institute                                       | J. Craig Venter Institute                                       | Shabman,R., Fedorova,N., Puri,V., Shrivastava,S., Amedeo,P., Isom,R., Hu,L., Pickett,B., Novotny,M., Durbin,A., Rocchi,I., Williams,T., Hall,C.B., Tesini,B.L., Schnabel,K.C., Walsh,E.E. and Caserta,M.                                                                                                                                                                         |
| EPI_ISL_2544020                                                                                                                                                                                                             | Broad Institute of MIT & Harvard                                | Broad Institute of MIT & Harvard                                | Newman,R.M., Zody,M.C., DeVincenzo,J.P., Grad,Y., Lipsitch,M., Murphy,R., Fitzgerald,M., Young,S., Gargeya,S., Poon,T.W., Charlebois,P., Weiner,B., Yang,X., Piper,M.E., McCowan,C., Ireland,A., Levin,J., Malboeuf,C., Qu,J., Chapman,S.B., Murphy,C., Wortman,J., Nusbaum,C. and Birren,B.                                                                                     |
| EPI_ISL_2544021, EPI_ISL_2544022, EPI_ISL_2544023, EPI_ISL_2544024                                                                                                                                                          | J. Craig Venter Institute                                       | J. Craig Venter Institute                                       | Das,S., Halpin,R.A., Bera,J., Fedorova,N., Tsitirin,T., Stockwell,T., Amedeo,P., Bishop,B., Gupta,N., Hoover,J., Katzel,D., Schobel,S., Shrivastava,S., Hartert,T., Moore,M., Chappell,J., Larkin,E., Wentworth,D.E. and Anderson,L.J.                                                                                                                                           |
| EPI_ISL_2544025                                                                                                                                                                                                             | Infectious Diseases, St. Jude Children's Research Hospital      | Infectious Diseases, St. Jude Children's Research Hospital      | DeVincenzo,J., Jones,B.G., Kim,Y.-I. and Hurwitz,J.L.                                                                                                                                                                                                                                                                                                                            |
| EPI_ISL_2544026, EPI_ISL_2544027, EPI_ISL_2544028                                                                                                                                                                           | J. Craig Venter Institute                                       | J. Craig Venter Institute                                       | Lorenzi,H., Halpin,R., Nguyen,A., Fedorova,N., Overton,L., Stockwell,T., Amedeo,P., Bishop,B., Chen,H., Edworthy,P., Gupta,N., Katzel,D., Li,K., Schobel,S., Shrivastava,S., Thovarai,V., Wang,S., Shapiro,C.A., Williams,J., Peebles,S., Chi,M., Wentworth,D.E. and Moore,M.L.                                                                                                  |
| EPI_ISL_2544029                                                                                                                                                                                                             | J. Craig Venter Institute                                       | J. Craig Venter Institute                                       | Lorenzi,H., Town,C., Halpin,R., Bera,J., Ransier,A., Fedorova,N., Stockwell,T., Amedeo,P., Appalla,L., Bishop,B., Edworthy,P., Gupta,N., Hoover,J., Katzel,D., Li,K., Schobel,S., Shrivastava,S., Thovarai,V., Wang,S., Rebuffo-Scheer,C., Fan,J., He,J., Kehl,S.C., Lederboer,N., Jurgens,L.A., Bose,M.E., Beck,E.T., Kumar,S., Gerna,G., Wentworth,D.E. and Henrickson,K.J.    |
| EPI_ISL_2544030, EPI_ISL_2544031                                                                                                                                                                                            | Pediatrics - Infectious Diseases, Medical College of Wisconsin  | Pediatrics - Infectious Diseases, Medical College of Wisconsin  | Rebuffo-Scheer,C., Bose,M.E., He,J., Khajisa,U., Ulatowski,M., Beck,E.T., Fan,J., Kumar,S., Nelson,M.I. and Henrickson,K.J.                                                                                                                                                                                                                                                      |
| EPI_ISL_2544032                                                                                                                                                                                                             | Molecular Virology and Microbiology, Baylor College of Medicine | Molecular Virology and Microbiology, Baylor College of Medicine | Tapia,L.I. and Piedra,P.A.                                                                                                                                                                                                                                                                                                                                                       |
| EPI_ISL_2544033                                                                                                                                                                                                             | J. Craig Venter Institute                                       | J. Craig Venter Institute                                       | Lorenzi,H., Town,C., Halpin,R., Bera,J., Ransier,A., Fedorova,N., Stockwell,T., Amedeo,P., Appalla,L., Bishop,B., Edworthy,P., Gupta,N., Hoover,J., Katzel,D., Li,K., Schobel,S., Shrivastava,S., Thovarai,V., Wang,S., Rebuffo-Scheer,C., Fan,J., He,J., Kehl,S.C., Lederboer,N., Jurgens,L.A., Bose,M.E., Beck,E.T., Kumar,S., Kok,T., Wentworth,D.E. and Henrickson,K.J.      |
| EPI_ISL_2544034, EPI_ISL_2544035, EPI_ISL_2544036, EPI_ISL_2544037, EPI_ISL_2544038, EPI_ISL_2544039, EPI_ISL_2544040, EPI_ISL_2544041                                                                                      | J. Craig Venter Institute                                       | J. Craig Venter Institute                                       | Shabman,R., Das,S.R., Shiels,M., Fedorova,N., Puri,V., Shrivastava,S., Amedeo,P., Williams,M., Barratt,K., Mitchell,J. and Jennings,L.                                                                                                                                                                                                                                           |
| EPI_ISL_2544044                                                                                                                                                                                                             | J. Craig Venter Institute                                       | J. Craig Venter Institute                                       | Lorenzi,H., Town,C., Halpin,R., Bera,J., Ransier,A., Fedorova,N., Stockwell,T., Amedeo,P., Appalla,L., Bishop,B., Edworthy,P., Gupta,N., Hoover,J., Katzel,D., Schobel,S., Shrivastava,S., Thovarai,V., Wang,S., Rebuffo-Scheer,C., Fan,J., He,J., Kehl,S.C., Lederboer,N., Jurgens,L.A., Bose,M.E., Beck,E.T., Kumar,S., Videla,C., Wentworth,D.E. and Henrickson,K.J.          |
| EPI_ISL_2544045, EPI_ISL_2544046                                                                                                                                                                                            | J. Craig Venter Institute                                       | J. Craig Venter Institute                                       | Lorenzi,H., Town,C., Halpin,R., Bera,J., Ransier,A., Fedorova,N., Stockwell,T., Amedeo,P., Appalla,L., Bishop,B., Edworthy,P., Gupta,N., Hoover,J., Katzel,D., Li,K., Schobel,S., Shrivastava,S., Thovarai,V., Wang,S., Rebuffo-Scheer,C., Fan,J., He,J., Kehl,S.C., Lederboer,N., Jurgens,L.A., Bose,M.E., Beck,E.T., Kumar,S., Videla,C., Wentworth,D.E. and Henrickson,K.J.   |
| EPI_ISL_2544051                                                                                                                                                                                                             | Virology Laboratory, Dr. Ricardo Gutierrez Children Hospital    | Virology Laboratory, Dr. Ricardo Gutierrez Children Hospital    | Goya,S., Valinotto,L.E., Tittarelli,E., Rojo,G.L., Greninger,A., Luso,S., Natale,M., Mischkenko,A.S. and Viegas,M.                                                                                                                                                                                                                                                               |
| EPI_ISL_2544052                                                                                                                                                                                                             | Virology Laboratory, Dr. Ricardo Gutierrez Children Hospital    | Virology Laboratory, Dr. Ricardo Gutierrez Children Hospital    | Goya,S., Valinotto,L.E., Tittarelli,E., Rojo,G.L., Greninger,A., Zaiat,J., Marti,M., Mischchenko,A.S. and Viegas,M.                                                                                                                                                                                                                                                              |
| EPI_ISL_2544055, EPI_ISL_2544056, EPI_ISL_2544057, EPI_ISL_2544058, EPI_ISL_2544059, EPI_ISL_2544060, EPI_ISL_2544061, EPI_ISL_2544062, EPI_ISL_2544063, EPI_ISL_2544064                                                    | J. Craig Venter Institute                                       | J. Craig Venter Institute                                       | Wentworth,D.E., Halpin,R.A., Bera,J., Lin,X., Fedorova,N., Tsitirin,T., McLellan,M., Stockwell,T., Amedeo,P., Bishop,B., Gupta,N., Hoover,J., Katzel,D., Schobel,S., Shrivastava,S., Garcia,J., Laguna-Torres,V.A., Leguia,M., Benavides,J.G. and Halsey,E.                                                                                                                      |
| EPI_ISL_2544066, EPI_ISL_2544067                                                                                                                                                                                            | KEMRI Wellcome Trust Research Programme                         | KEMRI Wellcome Trust Research Programme                         | Agoti,C.N., Otieno,J.R., Munywoki,P.K., Mwhuri,A.G., Cane,P.A., Nokes,D.J., Kellam,P. and Cotten,M.L.                                                                                                                                                                                                                                                                            |
| EPI_ISL_2544090, EPI_ISL_2544091, EPI_ISL_2544092, EPI_ISL_2544093                                                                                                                                                          | J. Craig Venter Institute                                       | J. Craig Venter Institute                                       | Shabman,R., Das,S.R., Puri,V., Fedorova,N., Amedeo,P., Williams,M., Shrivastava,S. and Halasa,N.                                                                                                                                                                                                                                                                                 |

|                                                                                                                                                                                                                                                                                |                                                                           |                                                                           |  |                                                                                                                                                                                                                                                                                                                                                                                          |
|--------------------------------------------------------------------------------------------------------------------------------------------------------------------------------------------------------------------------------------------------------------------------------|---------------------------------------------------------------------------|---------------------------------------------------------------------------|--|------------------------------------------------------------------------------------------------------------------------------------------------------------------------------------------------------------------------------------------------------------------------------------------------------------------------------------------------------------------------------------------|
| EPI_ISL_2544094                                                                                                                                                                                                                                                                |                                                                           |                                                                           |  |                                                                                                                                                                                                                                                                                                                                                                                          |
| EPI_ISL_2544100, EPI_ISL_2544101, EPI_ISL_2544102, EPI_ISL_2544103, EPI_ISL_2544104                                                                                                                                                                                            | Emerging Viral Infections, Oxford University Clinical Research Unit       | Emerging Viral Infections, Oxford University Clinical Research Unit       |  | Do,L.A.H., Wilm,A., van Doorn,H.R., Lam,H.M., Sukumaran,R., Tran,A.T., Nguyen,B.H., Tran,T.T.L., Tran,Q.H., Vo,Q.B., Tran Dac,N.A., Trinh,H.N., Nguyen,t.T.H., Le Binh,B.T., Le,K., Nguyen,M.T., Thai,Q.T., Vo,T.V., Ngo,N.Q.M., Dang,t.K.H., Cao,N.H., Tran,T.V., Ho,L.V., Farrar,J., de Jong,M.D., Chen,S., Nagarajan,N., Bryant,J.E. and Hibberd,M.L.                                 |
| EPI_ISL_2544106                                                                                                                                                                                                                                                                | Medical Microbiology, University Medical Center Utrecht                   | Medical Microbiology, University Medical Center Utrecht                   |  | Tan,L., Viveen,M.C., Lemey,P. and Coenjaerts,F.E.                                                                                                                                                                                                                                                                                                                                        |
| EPI_ISL_2544107                                                                                                                                                                                                                                                                | J. Craig Venter Institute                                                 | J. Craig Venter Institute                                                 |  | Lorenzi,H., Town,C., Halpin,R., Bera,J., Ransier,A., Fedorova,N., Stockwell,T., Amedeo,P., Appalla,L., Bishop,B., Edworthy,P., Gupta,N., Hoover,J., Katzel,D., Li,K., Schobel,S., Shrivastava,S., Thovarai,V., Wang,S., Rebuffo-Scheer,C., Fan,J., He,J., Kehl,S.C., Lederboer,N., Jurgens,L.A., Bose,M.E., Beck,E.T., Kumar,S., Neumann-Haefelin,D., Wentworth,D.E. and Henrickson,K.J. |
| EPI_ISL_2544108                                                                                                                                                                                                                                                                | J. Craig Venter Institute                                                 | J. Craig Venter Institute                                                 |  | Lorenzi,H., Town,C., Halpin,R., Bera,J., Ransier,A., Fedorova,N., Stockwell,T., Amedeo,P., Appalla,L., Bishop,B., Edworthy,P., Gupta,N., Hoover,J., Katzel,D., Li,K., Schobel,S., Shrivastava,S., Thovarai,V., Wang,S., Rebuffo-Scheer,C., Fan,J., He,J., Kehl,S.C., Lederboer,N., Jurgens,L.A., Bose,M.E., Beck,E.T., Kumar,S., Gerna,G., Wentworth,D.E. and Henrickson,K.J.            |
| EPI_ISL_2544109, EPI_ISL_2544110, EPI_ISL_2544111, EPI_ISL_2544112, EPI_ISL_2544113, EPI_ISL_2544114, EPI_ISL_2544115                                                                                                                                                          | Medical Microbiology, University Medical Center Utrecht                   | Medical Microbiology, University Medical Center Utrecht                   |  | Tan,L., Viveen,M.C., Lemey,P. and Coenjaerts,F.E.                                                                                                                                                                                                                                                                                                                                        |
| EPI_ISL_2544121, EPI_ISL_2544122, EPI_ISL_2544123, EPI_ISL_2544124, EPI_ISL_2544125, EPI_ISL_2544126                                                                                                                                                                           | Reference Microbiology, Public Health England National Infection Services | Reference Microbiology, Public Health England National Infection Services |  | Valappil,M., Talts,T., Ellis,J., Sails,A., Eltringham,G., Waugh,S., Gould,K., Harrison,I., Pebody,R. and Zambon,M.                                                                                                                                                                                                                                                                       |
| EPI_ISL_2544137, EPI_ISL_2544138                                                                                                                                                                                                                                               | J. Craig Venter Institute                                                 | J. Craig Venter Institute                                                 |  | Lorenzi,H., Town,C., Halpin,R., Bera,J., Ransier,A., Fedorova,N., Stockwell,T., Amedeo,P., Appalla,L., Bishop,B., Edworthy,P., Gupta,N., Hoover,J., Katzel,D., Li,K., Schobel,S., Shrivastava,S., Thovarai,V., Wang,S., Rebuffo-Scheer,C., Fan,J., He,J., Kehl,S.C., Lederboer,N., Jurgens,L.A., Bose,M.E., Beck,E.T., Kumar,S., Noyola,D.E., Wentworth,D.E. and Henrickson,K.J.         |
| EPI_ISL_2544141, EPI_ISL_2544142, EPI_ISL_2544143, EPI_ISL_2544144, EPI_ISL_2544145, EPI_ISL_2544146                                                                                                                                                                           | J. Craig Venter Institute                                                 | J. Craig Venter Institute                                                 |  | Das,S.R., Halpin,R.A., Shilts,M., Puri,V., Akopov,A., Fedorova,N., Stockwell,T., Amedeo,P., Bishop,B., Katzel,D., Schobel,S., Shrivastava,S. and Hartert,T.                                                                                                                                                                                                                              |
| EPI_ISL_2544147                                                                                                                                                                                                                                                                | Lab Medicine, UW                                                          | Lab Medicine, UW                                                          |  | Greninger,A.L., Makhous,N., Kuypers,J.M., Shean,R.C. and Jerome,K.R.                                                                                                                                                                                                                                                                                                                     |
| EPI_ISL_2544148, EPI_ISL_2544149, EPI_ISL_2544150                                                                                                                                                                                                                              | Pediatrics, UT Southwestern Medical Center                                | Pediatrics, UT Southwestern Medical Center                                |  | Levitz,R., Gao,Y., Dozmorov,I., Song,R., Wakeland,E.K. and Kahn,J.S.                                                                                                                                                                                                                                                                                                                     |
| EPI_ISL_2544151                                                                                                                                                                                                                                                                | MedImmune                                                                 | MedImmune                                                                 |  | Cheng,X., Park,H. and Jin,H.                                                                                                                                                                                                                                                                                                                                                             |
| EPI_ISL_2544152                                                                                                                                                                                                                                                                | St. Louis University Medical Center                                       | Viral Vaccine Research                                                    |  | R. Belshe, Karron,R.A., Buonagurio,D.A., Georgiu,A.F., Whitehead,S.S., Adamus,J.E., Clements-Mann,M.L., Harris,D.O., Randolph,V.B., Udem,S.A., Murphy,B.R. and Sidhu,M.S.                                                                                                                                                                                                                |
| EPI_ISL_2544153, EPI_ISL_2544154, EPI_ISL_2544155, EPI_ISL_2544156                                                                                                                                                                                                             | J. Craig Venter Institute                                                 | J. Craig Venter Institute                                                 |  | Das,S.R., Halpin,R.A., Puri,V., Akopov,A., Fedorova,N., Stockwell,T., Amedeo,P., Bishop,B., Katzel,D., Schobel,S., Shrivastava,S., Wentworth,D.E. and Caserta,M.                                                                                                                                                                                                                         |
| EPI_ISL_2544157, EPI_ISL_2544158, EPI_ISL_2544159, EPI_ISL_2544160, EPI_ISL_2544161, EPI_ISL_2544162                                                                                                                                                                           | J. Craig Venter Institute                                                 | J. Craig Venter Institute                                                 |  | Das,S.R., Halpin,R.A., Puri,V., Akopov,A., Fedorova,N., Stockwell,T., Amedeo,P., Bishop,B., Katzel,D., Schobel,S., Shrivastava,S., Hall,C.B., Tesini,B.L., Schnabel,K.C., Walsh,E.E. and Caserta,M.                                                                                                                                                                                      |
| EPI_ISL_2544163, EPI_ISL_2544164, EPI_ISL_2544165                                                                                                                                                                                                                              | J. Craig Venter Institute                                                 | J. Craig Venter Institute                                                 |  | Shabman,R., Fedorova,N., Puri,V., Shrivastava,S., Amedeo,P., Isom,R., Hu,L., Pickett,B., Novotny,M., Durbin,A., Rocchi,I., Williams,T., Hall,C.B., Tesini,B.L., Schnabel,K.C., Walsh,E.E. and Caserta,M.                                                                                                                                                                                 |
| EPI_ISL_2544171, EPI_ISL_2544172                                                                                                                                                                                                                                               | Pediatrics - Infectious Diseases, Medical College of Wisconsin            | Pediatrics - Infectious Diseases, Medical College of Wisconsin            |  | Rebuffo-Scheer,C., Bose,M.E., He,J., Khajia,S., Ulatowski,M., Beck,E.T., Fan,J., Kumar,S., Nelson,M.I. and Henrickson,K.J.                                                                                                                                                                                                                                                               |
| EPI_ISL_2544173, EPI_ISL_2544174, EPI_ISL_2544175, EPI_ISL_2544176, EPI_ISL_2544177, EPI_ISL_2544178                                                                                                                                                                           | J. Craig Venter Institute                                                 | J. Craig Venter Institute                                                 |  | Shabman,R., Das,S.R., Shilts,M., Fedorova,N., Puri,V., Shrivastava,S., Amedeo,P., Williams,M., Barratt,K., Mitchell,J. and Jennings,L.                                                                                                                                                                                                                                                   |
| EPI_ISL_2544180, EPI_ISL_2544181                                                                                                                                                                                                                                               | J. Craig Venter Institute                                                 | J. Craig Venter Institute                                                 |  | Lorenzi,H., Town,C., Halpin,R., Bera,J., Ransier,A., Fedorova,N., Stockwell,T., Amedeo,P., Appalla,L., Bishop,B., Edworthy,P., Gupta,N., Hoover,J., Katzel,D., Li,K., Schobel,S., Shrivastava,S., Thovarai,V., Wang,S., Rebuffo-Scheer,C., Fan,J., He,J., Kehl,S.C., Lederboer,N., Jurgens,L.A., Bose,M.E., Beck,E.T., Kumar,S., Videla,C., Wentworth,D.E. and Henrickson,K.J.           |
| EPI_ISL_2544184                                                                                                                                                                                                                                                                | Virology Laboratory, Dr. Ricardo Gutierrez Children Hospital              | Virology Laboratory, Dr. Ricardo Gutierrez Children Hospital              |  | Goya,S., Valinotto,L.E., Tittarelli,E., Rojo,G.L., Greninger,A., Luso,S., Natale,M., Mistchenko,A.S. and Viegas,M.                                                                                                                                                                                                                                                                       |
| EPI_ISL_2544185                                                                                                                                                                                                                                                                | Virology Laboratory, Dr. Ricardo Gutierrez Children Hospital              | Virology Laboratory, Dr. Ricardo Gutierrez Children Hospital              |  | Goya,S., Valinotto,L.E., Tittarelli,E., Rojo,G.L., Greninger,A., Zaiat,J., Marti,M., Mistchenko,A.S. and Viegas,M.                                                                                                                                                                                                                                                                       |
| EPI_ISL_2544186                                                                                                                                                                                                                                                                | Virology Laboratory, Dr. Ricardo Gutierrez Children Hospital              | Virology Laboratory, Dr. Ricardo Gutierrez Children Hospital              |  | Goya,S., Rojo,G.L., Valinotto,L.E., Mistchenko,A.S. and Viegas,M.                                                                                                                                                                                                                                                                                                                        |
| EPI_ISL_2544188, EPI_ISL_2544189                                                                                                                                                                                                                                               | Microbiology, Institute of Biological Sciences, Universeity of Sao Paulo  | Microbiology, Institute of Biological Sciences, Universeity of Sao Paulo  |  | Di Paola,N., Cunha,M.P., Oliveira,D.B.L., Durigon,E., Durigon,G.S. and Zanotto,P.M.A.                                                                                                                                                                                                                                                                                                    |
| EPI_ISL_2544190, EPI_ISL_2544191, EPI_ISL_2544192                                                                                                                                                                                                                              | J. Craig Venter Institute                                                 | J. Craig Venter Institute                                                 |  | Wentworth,D.E., Halpin,R.A., Bera,J., Lin,X., Fedorova,N., Tsitrin,T., McLellan,M., Stockwell,T., Amedeo,P., Bishop,B., Gupta,N., Hoover,J., Katzel,D., Schobel,S., Shrivastava,S., Garcia,J., Laguna-Torres,V.A., Leguia,M., Benavides,J.G. and Halsey,E.                                                                                                                               |
| EPI_ISL_2558779                                                                                                                                                                                                                                                                | Kazuya Shirato National Institute of Infectious Diseases, Virology III    | Kazuya Shirato National Institute of Infectious Diseases, Virology III    |  | Shirato,K., Sato,K., Daplat,I., Nao,N., Omiya,S., Matsuyama,S., Takeda,M. and Nishimura,H.                                                                                                                                                                                                                                                                                               |
| EPI_ISL_2558780, EPI_ISL_2558781, EPI_ISL_2558782                                                                                                                                                                                                                              | Pediatrics - Infectious Diseases, Medical College of Wisconsin            | Pediatrics - Infectious Diseases, Medical College of Wisconsin            |  | Rebuffo-Scheer,C., Bose,M.E., He,J., Khajia,S., Ulatowski,M., Beck,E.T., Fan,J., Kumar,S., Nelson,M.I. and Henrickson,K.J.                                                                                                                                                                                                                                                               |
| EPI_ISL_2558785, EPI_ISL_2558786, EPI_ISL_2558799                                                                                                                                                                                                                              | Kazuya Shirato National Institute of Infectious Diseases, Virology III    | Kazuya Shirato National Institute of Infectious Diseases, Virology III    |  | Shirato,K., Sato,K., Daplat,I., Nao,N., Omiya,S., Matsuyama,S., Takeda,M. and Nishimura,H.                                                                                                                                                                                                                                                                                               |
| EPI_ISL_2558800                                                                                                                                                                                                                                                                | J. Craig Venter Institute                                                 | J. Craig Venter Institute                                                 |  | Shabman,R., Fedorova,N., Puri,V., Shrivastava,S., Amedeo,P., Isom,R., Hu,L., Pickett,B., Novotny,M., Durbin,A., Rocchi,I., Williams,T., Hall,C.B., Tesini,B.L., Schnabel,K.C., Walsh,E.E. and Caserta,M.                                                                                                                                                                                 |
| EPI_ISL_2558884                                                                                                                                                                                                                                                                | Kazuya Shirato National Institute of Infectious Diseases, Virology III    | Kazuya Shirato National Institute of Infectious Diseases, Virology III    |  | Shirato,K., Sato,K., Daplat,I., Nao,N., Omiya,S., Matsuyama,S., Takeda,M. and Nishimura,H.                                                                                                                                                                                                                                                                                               |
| EPI_ISL_2558885                                                                                                                                                                                                                                                                | Pediatrics - Infectious Diseases, Medical College of Wisconsin            | Pediatrics - Infectious Diseases, Medical College of Wisconsin            |  | Rebuffo-Scheer,C., Bose,M.E., He,J., Khajia,S., Ulatowski,M., Beck,E.T., Fan,J., Kumar,S., Nelson,M.I. and Henrickson,K.J.                                                                                                                                                                                                                                                               |
| EPI_ISL_2558886, EPI_ISL_2558887, EPI_ISL_2558888, EPI_ISL_2558895, EPI_ISL_2558896, EPI_ISL_2558897, EPI_ISL_2558898, EPI_ISL_2558899, EPI_ISL_2558900, EPI_ISL_2558901, EPI_ISL_2558902, EPI_ISL_2558903, EPI_ISL_2558904, EPI_ISL_2558905, EPI_ISL_2558907, EPI_ISL_2558908 | Kazuya Shirato National Institute of Infectious Diseases, Virology III    | Kazuya Shirato National Institute of Infectious Diseases, Virology III    |  | Shirato,K., Sato,K., Daplat,I., Nao,N., Omiya,S., Matsuyama,S., Takeda,M. and Nishimura,H.                                                                                                                                                                                                                                                                                               |
| see above                                                                                                                                                                                                                                                                      | Kazuya Shirato National Institute of Infectious Diseases, Virology III    | Kazuya Shirato National Institute of Infectious Diseases, Virology III    |  | Shirato,K., Sato,K., Daplat,I., Nao,N., Omiya,S., Matsuyama,S., Takeda,M. and Nishimura,H.                                                                                                                                                                                                                                                                                               |
| EPI_ISL_2558919                                                                                                                                                                                                                                                                | J. Craig Venter Institute                                                 | J. Craig Venter Institute                                                 |  | Shabman,R., Fedorova,N., Puri,V., Shrivastava,S., Amedeo,P., Isom,R., Hu,L., Pickett,B., Novotny,M., Durbin,A., Rocchi,I., Williams,T., Hall,C.B., Tesini,B.L., Schnabel,K.C., Walsh,E.E. and Caserta,M.                                                                                                                                                                                 |
| EPI_ISL_2558924, EPI_ISL_2558925, EPI_ISL_2558926                                                                                                                                                                                                                              | Kazuya Shirato National Institute of Infectious Diseases, Virology III    | Kazuya Shirato National Institute of Infectious Diseases, Virology III    |  | Shirato,K., Sato,K., Daplat,I., Nao,N., Omiya,S., Matsuyama,S., Takeda,M. and Nishimura,H.                                                                                                                                                                                                                                                                                               |
| EPI_ISL_2558927                                                                                                                                                                                                                                                                | Lab Medicine, UW                                                          | Lab Medicine, UW                                                          |  | Greninger,A.L., Makhous,N., Kuypers,J.M., Shean,R.C. and Jerome,K.R.                                                                                                                                                                                                                                                                                                                     |

|                                                                                                                                                                                                                                                               |                                                                                                                                                           |                                                                                                                                                           |                                                                                                                                                                                                                 |
|---------------------------------------------------------------------------------------------------------------------------------------------------------------------------------------------------------------------------------------------------------------|-----------------------------------------------------------------------------------------------------------------------------------------------------------|-----------------------------------------------------------------------------------------------------------------------------------------------------------|-----------------------------------------------------------------------------------------------------------------------------------------------------------------------------------------------------------------|
| EPI_ISL_2558934, EPI_ISL_2558935, EPI_ISL_2558936                                                                                                                                                                                                             | J. Craig Venter Institute                                                                                                                                 | J. Craig Venter Institute                                                                                                                                 | Shabman,R., Fedorova,N., Puri,V., Shrivastava,S., Amedeo,P., Isom,R., Hu,L., Pickett,B., Novotny,M., Durbin,A., Rocchi,I., Williams,T., Hall,C.B., Tesini,B.L., Schnabel,K.C., Walsh,E.E. and Caserta,M.        |
| EPI_ISL_2558971                                                                                                                                                                                                                                               | Lab Medicine, UW                                                                                                                                          | Lab Medicine, UW                                                                                                                                          | Greninger,A.L., Makhous,N., Kuypers,J.M., Shean,R.C. and Jerome,K.R.                                                                                                                                            |
| EPI_ISL_2558973, EPI_ISL_2558974, EPI_ISL_2558975, EPI_ISL_2558976                                                                                                                                                                                            | J. Craig Venter Institute                                                                                                                                 | J. Craig Venter Institute                                                                                                                                 | Shabman,R., Fedorova,N., Puri,V., Shrivastava,S., Amedeo,P., Isom,R., Hu,L., Pickett,B., Novotny,M., Durbin,A., Rocchi,I., Williams,T., Hall,C.B., Tesini,B.L., Schnabel,K.C., Walsh,E.E. and Caserta,M.        |
| EPI_ISL_2558985                                                                                                                                                                                                                                               | Koichi Hashimoto Fukushima Medical University, Department of Pediatrics, School of Medicine                                                               | Koichi Hashimoto Fukushima Medical University, Department of Pediatrics, School of Medicine                                                               | Fukuyama,Y., Takeshita,F., Norito,S., Hashimoto,K. and Hosoya,M.                                                                                                                                                |
| EPI_ISL_2558987                                                                                                                                                                                                                                               | Department of Infectious Diseases and Pathobiology, Institute of Virology and Immunology (IVI)                                                            | Department of Infectious Diseases and Pathobiology, Institute of Virology and Immunology (IVI)                                                            | Thao,T.T.N., Labroussaa,F., Ebert,N., Stalder,H., Dijkman,R., Jores,J., Thiel,V., Bittel,P., Suter-Riniker,F. and Kelly,J.                                                                                      |
| EPI_ISL_2559009, EPI_ISL_2559010, EPI_ISL_2559011                                                                                                                                                                                                             | J. Craig Venter Institute                                                                                                                                 | J. Craig Venter Institute                                                                                                                                 | Shabman,R., Fedorova,N., Puri,V., Shrivastava,S., Amedeo,P., Isom,R., Hu,L., Pickett,B., Novotny,M., Durbin,A., Rocchi,I., Williams,T., Hall,C.B., Tesini,B.L., Schnabel,K.C., Walsh,E.E. and Caserta,M.        |
| EPI_ISL_2559012                                                                                                                                                                                                                                               | Center for Infectious Diseases, School of Public Health, University of Texas Health Science Center                                                        | Center for Infectious Diseases, School of Public Health, University of Texas Health Science Center                                                        | Bahl,J., Hixson,J., Kim,D.-K., Qiu,X., Piedra,P.A., Piedra,F.-A., Avadhanula,V. and Machado,A.A.                                                                                                                |
| EPI_ISL_2559013, EPI_ISL_2559014, EPI_ISL_2559015, EPI_ISL_2559016, EPI_ISL_2559017, EPI_ISL_2559018, EPI_ISL_2559019, EPI_ISL_2559069, EPI_ISL_2559070, EPI_ISL_2559071                                                                                      | J. Craig Venter Institute                                                                                                                                 | J. Craig Venter Institute                                                                                                                                 | Shabman,R., Fedorova,N., Puri,V., Shrivastava,S., Amedeo,P., Isom,R., Hu,L., Pickett,B., Novotny,M., Durbin,A., Rocchi,I., Williams,T., Hall,C.B., Tesini,B.L., Schnabel,K.C., Walsh,E.E. and Caserta,M.        |
| EPI_ISL_2559073                                                                                                                                                                                                                                               | Kazuya Shirato National Institute of Infectious Diseases, Virology III                                                                                    | Kazuya Shirato National Institute of Infectious Diseases, Virology III                                                                                    | Shirato,K., Sato,K., Dapat,I., Nao,N., Omiya,S., Matsuyama,S., Takeda,M. and Nishimura,H.                                                                                                                       |
| EPI_ISL_2559080                                                                                                                                                                                                                                               | Pediatrics - Infectious Diseases, Medical College of Wisconsin                                                                                            | Pediatrics - Infectious Diseases, Medical College of Wisconsin                                                                                            | Rebuffo-Scheer,C., Bose,M.E., He,J., Khaja,S., Ulatowski,M., Beck,E.T., Fan,J., Kumar,S., Nelson,M.I. and Henrickson,K.J.                                                                                       |
| EPI_ISL_2559081, EPI_ISL_2560801, EPI_ISL_2560802                                                                                                                                                                                                             | Kazuya Shirato National Institute of Infectious Diseases, Virology III                                                                                    | Kazuya Shirato National Institute of Infectious Diseases, Virology III                                                                                    | Shirato,K., Sato,K., Dapat,I., Nao,N., Omiya,S., Matsuyama,S., Takeda,M. and Nishimura,H.                                                                                                                       |
| EPI_ISL_2560803                                                                                                                                                                                                                                               | Lab Medicine, UW                                                                                                                                          | Lab Medicine, UW                                                                                                                                          | Greninger,A.L., Makhous,N., Kuypers,J.M., Shean,R.C. and Jerome,K.R.                                                                                                                                            |
| EPI_ISL_2560804                                                                                                                                                                                                                                               | Virology, University of Washington                                                                                                                        | Virology, University of Washington                                                                                                                        | Greninger,A.L., Shean,R.C. and Makhous,N.                                                                                                                                                                       |
| EPI_ISL_2560805                                                                                                                                                                                                                                               | Laboratory Medicine, UW Virology                                                                                                                          | Laboratory Medicine, UW Virology                                                                                                                          | Greninger,A.L., Tait,A. and Makhous,N.                                                                                                                                                                          |
| EPI_ISL_2560806                                                                                                                                                                                                                                               | Lab Medicine, UW                                                                                                                                          | Lab Medicine, UW                                                                                                                                          | Greninger,A.L., Makhous,N., Kuypers,J.M., Shean,R.C. and Jerome,K.R.                                                                                                                                            |
| EPI_ISL_2560807                                                                                                                                                                                                                                               | Kazuya Shirato National Institute of Infectious Diseases, Virology III                                                                                    | Kazuya Shirato National Institute of Infectious Diseases, Virology III                                                                                    | Shirato,K., Sato,K., Dapat,I., Nao,N., Omiya,S., Matsuyama,S., Takeda,M. and Nishimura,H.                                                                                                                       |
| EPI_ISL_2560808, EPI_ISL_2560809, EPI_ISL_2560815, EPI_ISL_2560837                                                                                                                                                                                            | Lab Medicine, UW                                                                                                                                          | Lab Medicine, UW                                                                                                                                          | Greninger,A.L., Makhous,N., Kuypers,J.M., Shean,R.C. and Jerome,K.R.                                                                                                                                            |
| EPI_ISL_2560838                                                                                                                                                                                                                                               | Kazuya Shirato National Institute of Infectious Diseases, Virology III                                                                                    | Kazuya Shirato National Institute of Infectious Diseases, Virology III                                                                                    | Shirato,K., Sato,K., Dapat,I., Nao,N., Omiya,S., Matsuyama,S., Takeda,M. and Nishimura,H.                                                                                                                       |
| EPI_ISL_2560839                                                                                                                                                                                                                                               | Lab Medicine, UW                                                                                                                                          | Lab Medicine, UW                                                                                                                                          | Greninger,A.L., Makhous,N., Kuypers,J.M., Shean,R.C. and Jerome,K.R.                                                                                                                                            |
| EPI_ISL_2561008, EPI_ISL_2561009, EPI_ISL_2561010                                                                                                                                                                                                             | Kazuya Shirato National Institute of Infectious Diseases, Virology III                                                                                    | Kazuya Shirato National Institute of Infectious Diseases, Virology III                                                                                    | Shirato,K., Sato,K., Dapat,I., Nao,N., Omiya,S., Matsuyama,S., Takeda,M. and Nishimura,H.                                                                                                                       |
| EPI_ISL_2561401                                                                                                                                                                                                                                               | Lab Medicine, UW                                                                                                                                          | Lab Medicine, UW                                                                                                                                          | Greninger,A.L., Makhous,N., Kuypers,J.M., Shean,R.C. and Jerome,K.R.                                                                                                                                            |
| EPI_ISL_2561453                                                                                                                                                                                                                                               | Maximum Containment Laboratory, National Institute of Virology                                                                                            | Maximum Containment Laboratory, National Institute of Virology                                                                                            | Yadav,P.D.                                                                                                                                                                                                      |
| EPI_ISL_2574728                                                                                                                                                                                                                                               | Epidemiology and Demography Department, KEMRI-Wellcome Trust Research Programme                                                                           | Epidemiology and Demography Department, KEMRI-Wellcome Trust Research Programme                                                                           | Otieno,J.R., Kamau,E.M., Oketch,J.W., Ngoi,J.M., Agoti,C.N., Gichuki,A.M., Otieno,G.P., Ngama,M., Cane,P.A., Kellam,P., Cotten,M., Lemey,P. and Nokes,D.J.                                                      |
| EPI_ISL_2575367                                                                                                                                                                                                                                               | Suguru Takeuchi Nagoya University Graduate School of Medicine, Pediatrics                                                                                 | Suguru Takeuchi Nagoya University Graduate School of Medicine, Pediatrics                                                                                 | Takeuchi,S., Kawada,J. and Ito,Y.                                                                                                                                                                               |
| EPI_ISL_2575413                                                                                                                                                                                                                                               | Pediatrics - Infectious Diseases, Medical College of Wisconsin                                                                                            | Pediatrics - Infectious Diseases, Medical College of Wisconsin                                                                                            | Rebuffo-Scheer,C., Bose,M.E., He,J., Khaja,S., Ulatowski,M., Beck,E.T., Fan,J., Kumar,S., Nelson,M.I. and Henrickson,K.J.                                                                                       |
| EPI_ISL_2575417                                                                                                                                                                                                                                               | Kazuya Shirato National Institute of Infectious Diseases, Virology III                                                                                    | Kazuya Shirato National Institute of Infectious Diseases, Virology III                                                                                    | Shirato,K., Sato,K., Dapat,I., Nao,N., Omiya,S., Matsuyama,S., Takeda,M. and Nishimura,H.                                                                                                                       |
| EPI_ISL_2575423                                                                                                                                                                                                                                               | J. Craig Venter Institute                                                                                                                                 | J. Craig Venter Institute                                                                                                                                 | Tan,G., Pickett,B., Fedorova,N., Amedeo,P., Hu,L., Christensen,J., Miller,J., Durbin,A., Williams,T., Arumemi,F., Cadiz,C., Alanis,R., Balmseda,A., Williams,T., Schiller,A., Patel,M., Kubale,J. and Gordon,A. |
| EPI_ISL_2575424                                                                                                                                                                                                                                               | Marie Bashir Institute for Infectious Diseases and Biosecurity & Sydney Medical School, The University of Sydney, Westmead Institute for Medical Research | Marie Bashir Institute for Infectious Diseases and Biosecurity & Sydney Medical School, The University of Sydney, Westmead Institute for Medical Research | Eden,J.-S., Kok,J., Dwyer,D.E., Fernandez,M., Carter,I. and Holmes,E.C.                                                                                                                                         |
| EPI_ISL_2575425                                                                                                                                                                                                                                               | Virus Research Group, Beijing Pediatric Research Institute, Beijing Children's Hospital, Capital Medical University                                       | Virus Research Group, Beijing Pediatric Research Institute, Beijing Children's Hospital, Capital Medical University                                       | Xu,L. and Xie,Z.                                                                                                                                                                                                |
| EPI_ISL_2575427, EPI_ISL_2575428, EPI_ISL_2575429, EPI_ISL_2575430                                                                                                                                                                                            | J. Craig Venter Institute                                                                                                                                 | J. Craig Venter Institute                                                                                                                                 | Tan,G., Pickett,B., Fedorova,N., Amedeo,P., Hu,L., Christensen,J., Miller,J., Durbin,A., Williams,T., Arumemi,F., Cadiz,C., Alanis,R., Balmseda,A., Williams,T., Schiller,A., Patel,M., Kubale,J. and Gordon,A. |
| EPI_ISL_2575431                                                                                                                                                                                                                                               | Reference Microbiology, Public Health England National Infection Services                                                                                 | Reference Microbiology, Public Health England National Infection Services                                                                                 | Valappil,M., Talts,T., Ellis,J., Sails,A., Eltringham,G., Waugh,S., Gould,K., Harrison,I., Pebody,R. and Zambon,M.                                                                                              |
| EPI_ISL_2575432                                                                                                                                                                                                                                               | Marie Bashir Institute for Infectious Diseases and Biosecurity & Sydney Medical School, The University of Sydney, Westmead Institute for Medical Research | Marie Bashir Institute for Infectious Diseases and Biosecurity & Sydney Medical School, The University of Sydney, Westmead Institute for Medical Research | Eden,J.-S., Kok,J., Dwyer,D.E., Fernandez,M., Carter,I. and Holmes,E.C.                                                                                                                                         |
| EPI_ISL_2575463                                                                                                                                                                                                                                               | J. Craig Venter Institute                                                                                                                                 | J. Craig Venter Institute                                                                                                                                 | Tan,G., Pickett,B., Fedorova,N., Amedeo,P., Hu,L., Christensen,J., Miller,J., Durbin,A., Williams,T., Arumemi,F., Cadiz,C., Alanis,R., Balmseda,A., Williams,T., Schiller,A., Patel,M., Kubale,J. and Gordon,A. |
| EPI_ISL_2575465                                                                                                                                                                                                                                               | Pediatrics, University of New Mexico                                                                                                                      | Pediatrics, University of New Mexico                                                                                                                      | Dinwiddle,D.                                                                                                                                                                                                    |
| EPI_ISL_2575471                                                                                                                                                                                                                                               | Michiko Okamoto Graduate School of Medicine, Tohoku University, Virology                                                                                  | Michiko Okamoto Graduate School of Medicine, Tohoku University, Virology                                                                                  | Okamoto,M. and Oshitani,H.                                                                                                                                                                                      |
| EPI_ISL_2575474, EPI_ISL_2575475, EPI_ISL_2575476, EPI_ISL_2575478, EPI_ISL_2575479, EPI_ISL_2575480, EPI_ISL_2575481, EPI_ISL_2575482, EPI_ISL_2575483, EPI_ISL_2575484, EPI_ISL_2575485, EPI_ISL_2575486, EPI_ISL_2575487, EPI_ISL_2575488, EPI_ISL_2575489 | see above                                                                                                                                                 | see above                                                                                                                                                 | Agoti,C.N., Phan,M.V.T., Munywoki,P.K., Githinji,G., Medley,G.F., Cane,P.A., Kellam,K., Cotten,M. and Nokes,D.J.                                                                                                |
| EPI_ISL_2575490                                                                                                                                                                                                                                               | Marie Bashir Institute for Infectious Diseases and Biosecurity                                                                                            | Marie Bashir Institute for Infectious Diseases and Biosecurity                                                                                            | Eden,J.-S., Kok,J., Dwyer,D.E., Fernandez,M., Carter,I. and Holmes,E.C.                                                                                                                                         |

|                                                                                                                                                 |                                                                                                                                                                 |                                                                                                                                                                 |                                                                                                                                                                                                                    |
|-------------------------------------------------------------------------------------------------------------------------------------------------|-----------------------------------------------------------------------------------------------------------------------------------------------------------------|-----------------------------------------------------------------------------------------------------------------------------------------------------------------|--------------------------------------------------------------------------------------------------------------------------------------------------------------------------------------------------------------------|
| EPI_ISL_2575491                                                                                                                                 | & Sydney Medical School, The University of Sydney,<br>Westmead Institute for Medical Research<br>J. Craig Venter Institute                                      | & Sydney Medical School, The University of Sydney,<br>Westmead Institute for Medical Research<br>J. Craig Venter Institute                                      | Tan,G., Pickett,B., Fedorova,N., Amedeo,P., Hu,L., Christensen,J., Miller,J., Durbin,A., Williams,T., Arumemi,F., Cadiz,C., Alanis,R., Balmseda,A.,<br>Williams,T., Schiller,A., Patel,M., Kubale,J. and Gordon,A. |
| EPI_ISL_2575492                                                                                                                                 | Reference Microbiology, Public Health England National<br>Infection Services<br>J. Craig Venter Institute                                                       | Reference Microbiology, Public Health England National<br>Infection Services<br>J. Craig Venter Institute                                                       | Valappil,M., Talts,T., Ellis,J., Sails,A., Eltringham,G., Waugh,S., Gould,K., Harrison,I., Pebody,R. and Zambon,M.                                                                                                 |
| EPI_ISL_2575493                                                                                                                                 | J. Craig Venter Institute                                                                                                                                       | J. Craig Venter Institute                                                                                                                                       | Tan,G., Pickett,B., Fedorova,N., Amedeo,P., Isom,R., Hu,L., Christensen,J., Miller,J., Novotny,M., Durbin,A., Rocchi,I., Williams,T., Arumemi,F. and Das,S.                                                        |
| EPI_ISL_2575494, EPI_ISL_2575495                                                                                                                | Marie Bashir Institute for Infectious Diseases and Biosecurity<br>& Sydney Medical School, The University of Sydney,<br>Westmead Institute for Medical Research | Marie Bashir Institute for Infectious Diseases and Biosecurity<br>& Sydney Medical School, The University of Sydney,<br>Westmead Institute for Medical Research | Eden,J.-S., Kok,J., Dwyer,D.E., Fernandez,M., Carter,I. and Holmes,E.C.                                                                                                                                            |
| EPI_ISL_2575496, EPI_ISL_2575497                                                                                                                | Pediatrics, University of New Mexico                                                                                                                            | Pediatrics, University of New Mexico                                                                                                                            | Dinwiddle,D.                                                                                                                                                                                                       |
| EPI_ISL_2575498                                                                                                                                 | J. Craig Venter Institute                                                                                                                                       | J. Craig Venter Institute                                                                                                                                       | Tan,G., Pickett,B., Fedorova,N., Amedeo,P., Hu,L., Christensen,J., Miller,J., Durbin,A., Williams,T., Arumemi,F., Cadiz,C., Alanis,R., Balmseda,A.,<br>Williams,T., Schiller,A., Patel,M., Kubale,J. and Gordon,A. |
| EPI_ISL_2575499                                                                                                                                 | Department of Experimental Modeling and Infectious<br>Diseases Pathogenesis, Federal Research Center of<br>Fundamental and Translational Medicine               | Department of Experimental Modeling and Infectious<br>Diseases Pathogenesis, Federal Research Center of<br>Fundamental and Translational Medicine               | Kurskaya,O.G., Sobolev,I.A., Sharshov,K.A., Alexeev,A.Y., Murashkina,T.A., Kabilov,M.R., Alikina,T.Y. and Shestopalov,A.M.                                                                                         |
| EPI_ISL_2575500                                                                                                                                 | Department of Experimental Modeling and Infectious<br>Diseases Pathogenesis, Federal Research Center of<br>Fundamental and Translational Medicine               | Department of Experimental Modeling and Infectious<br>Diseases Pathogenesis, Federal Research Center of<br>Fundamental and Translational Medicine               | Sobolev,I.A., Kurskaya,O.G., Sharshov,K.A., Alexeev,A.Y., Murashkina,T.A., Kabilov,M.R., Alikina,T.Y. and Shestopalov,A.M.                                                                                         |
| EPI_ISL_2575505, EPI_ISL_2575506                                                                                                                | Marie Bashir Institute for Infectious Diseases and Biosecurity<br>& Sydney Medical School, The University of Sydney,<br>Westmead Institute for Medical Research | Marie Bashir Institute for Infectious Diseases and Biosecurity<br>& Sydney Medical School, The University of Sydney,<br>Westmead Institute for Medical Research | Eden,J.-S., Kok,J., Dwyer,D.E., Fernandez,M., Carter,I. and Holmes,E.C.                                                                                                                                            |
| EPI_ISL_2575507                                                                                                                                 | J. Craig Venter Institute                                                                                                                                       | J. Craig Venter Institute                                                                                                                                       | Tan,G., Pickett,B., Fedorova,N., Amedeo,P., Hu,L., Christensen,J., Miller,J., Durbin,A., Williams,T., Arumemi,F., Cadiz,C., Alanis,R., Balmseda,A.,<br>Williams,T., Schiller,A., Patel,M., Kubale,J. and Gordon,A. |
| EPI_ISL_2575508, EPI_ISL_2575509,<br>EPI_ISL_2575510, EPI_ISL_2575511                                                                           | Marie Bashir Institute for Infectious Diseases and Biosecurity<br>& Sydney Medical School, The University of Sydney,<br>Westmead Institute for Medical Research | Marie Bashir Institute for Infectious Diseases and Biosecurity<br>& Sydney Medical School, The University of Sydney,<br>Westmead Institute for Medical Research | Eden,J.-S., Kok,J., Dwyer,D.E., Fernandez,M., Carter,I. and Holmes,E.C.                                                                                                                                            |
| EPI_ISL_2575512                                                                                                                                 | Michiko Okamoto Graduate School of Medicine, Tohoku<br>University, Virology                                                                                     | Michiko Okamoto Graduate School of Medicine, Tohoku<br>University, Virology                                                                                     | Okamoto,M. and Oshitani,H.                                                                                                                                                                                         |
| EPI_ISL_2575513                                                                                                                                 | Marie Bashir Institute for Infectious Diseases and Biosecurity<br>& Sydney Medical School, The University of Sydney,<br>Westmead Institute for Medical Research | Marie Bashir Institute for Infectious Diseases and Biosecurity<br>& Sydney Medical School, The University of Sydney,<br>Westmead Institute for Medical Research | Eden,J.-S., Kok,J., Dwyer,D.E., Fernandez,M., Carter,I. and Holmes,E.C.                                                                                                                                            |
| EPI_ISL_2575515, EPI_ISL_2575516,<br>EPI_ISL_2575517                                                                                            | Reference Microbiology, Public Health England National<br>Infection Services                                                                                    | Reference Microbiology, Public Health England National<br>Infection Services                                                                                    | Valappil,M., Talts,T., Ellis,J., Sails,A., Eltringham,G., Waugh,S., Gould,K., Harrison,I., Pebody,R. and Zambon,M.                                                                                                 |
| EPI_ISL_2575518, EPI_ISL_2575522,<br>EPI_ISL_2575523, EPI_ISL_2575524                                                                           | Pediatrics, University of New Mexico                                                                                                                            | Pediatrics, University of New Mexico                                                                                                                            | Dinwiddle,D.                                                                                                                                                                                                       |
| EPI_ISL_2575531                                                                                                                                 | Center for Infectious Diseases, School of Public Health,<br>University of Texas Health Science Center                                                           | Center for Infectious Diseases, School of Public Health,<br>University of Texas Health Science Center                                                           | Bahl,J., Hixson,J., Kim,D.-K., Qiu,X., Piedra,P.A., Piedra,F.-A., Avadhanula,V. and Machado,A.A.                                                                                                                   |
| EPI_ISL_2575532                                                                                                                                 | Epidemiology and Demography Department, KEMRI<br>Wellcome Trust Research Collaborative Programme                                                                | Epidemiology and Demography Department, KEMRI<br>Wellcome Trust Research Collaborative Programme                                                                | Agoti,C.N., Phan,M.V.T., Munywoki,P.K., Githinji,G., Medley,G.F., Cane,P.A., Kellam,K., Cotten,M. and Nokes,D.J.                                                                                                   |
| EPI_ISL_2575536, EPI_ISL_2575538                                                                                                                | Marie Bashir Institute for Infectious Diseases and Biosecurity<br>& Sydney Medical School, The University of Sydney,<br>Westmead Institute for Medical Research | Marie Bashir Institute for Infectious Diseases and Biosecurity<br>& Sydney Medical School, The University of Sydney,<br>Westmead Institute for Medical Research | Eden,J.-S., Kok,J., Dwyer,D.E., Fernandez,M., Carter,I. and Holmes,E.C.                                                                                                                                            |
| EPI_ISL_2575546, EPI_ISL_2575547                                                                                                                | Department of Experimental Modeling and Infectious<br>Diseases Pathogenesis, Federal Research Center of<br>Fundamental and Translational Medicine               | Department of Experimental Modeling and Infectious<br>Diseases Pathogenesis, Federal Research Center of<br>Fundamental and Translational Medicine               | Kurskaya,O.G., Sobolev,I.A., Sharshov,K.A., Alexeev,A.Y., Murashkina,T.A., Kabilov,M.R., Alikina,T.Y. and Shestopalov,A.M.                                                                                         |
| EPI_ISL_2575548                                                                                                                                 | J. Craig Venter Institute                                                                                                                                       | J. Craig Venter Institute                                                                                                                                       | Tan,G., Pickett,B., Fedorova,N., Amedeo,P., Hu,L., Christensen,J., Miller,J., Durbin,A., Williams,T., Arumemi,F., Cadiz,C., Alanis,R., Balmseda,A.,<br>Williams,T., Schiller,A., Patel,M., Kubale,J. and Gordon,A. |
| EPI_ISL_2575549                                                                                                                                 | Marie Bashir Institute for Infectious Diseases and Biosecurity<br>& Sydney Medical School, The University of Sydney,<br>Westmead Institute for Medical Research | Marie Bashir Institute for Infectious Diseases and Biosecurity<br>& Sydney Medical School, The University of Sydney,<br>Westmead Institute for Medical Research | Eden,J.-S., Kok,J., Dwyer,D.E., Fernandez,M., Carter,I. and Holmes,E.C.                                                                                                                                            |
| EPI_ISL_2575564                                                                                                                                 | Reference Microbiology, Public Health England National<br>Infection Services                                                                                    | Reference Microbiology, Public Health England National<br>Infection Services                                                                                    | Valappil,M., Talts,T., Ellis,J., Sails,A., Eltringham,G., Waugh,S., Gould,K., Harrison,I., Pebody,R. and Zambon,M.                                                                                                 |
| EPI_ISL_2575565                                                                                                                                 | Epidemiology and Demography Department, KEMRI<br>Wellcome Trust Research Collaborative Programme                                                                | Epidemiology and Demography Department, KEMRI<br>Wellcome Trust Research Collaborative Programme                                                                | Agoti,C.N., Phan,M.V.T., Munywoki,P.K., Githinji,G., Medley,G.F., Cane,P.A., Kellam,K., Cotten,M. and Nokes,D.J.                                                                                                   |
| EPI_ISL_2575566                                                                                                                                 | J. Craig Venter Institute                                                                                                                                       | J. Craig Venter Institute                                                                                                                                       | Tan,G., Pickett,B., Fedorova,N., Amedeo,P., Isom,R., Hu,L., Christensen,J., Miller,J., Novotny,M., Durbin,A., Rocchi,I., Williams,T., Arumemi,F. and Das,S.                                                        |
| EPI_ISL_2575567                                                                                                                                 | J. Craig Venter Institute                                                                                                                                       | J. Craig Venter Institute                                                                                                                                       | Tan,G., Pickett,B., Fedorova,N., Amedeo,P., Hu,L., Christensen,J., Miller,J., Durbin,A., Williams,T., Arumemi,F., Cadiz,C., Alanis,R., Balmseda,A.,<br>Williams,T., Schiller,A., Patel,M., Kubale,J. and Gordon,A. |
| EPI_ISL_2575568, EPI_ISL_2575569                                                                                                                | Epidemiology and Demography Department, KEMRI<br>Wellcome Trust Research Collaborative Programme                                                                | Epidemiology and Demography Department, KEMRI<br>Wellcome Trust Research Collaborative Programme                                                                | Agoti,C.N., Phan,M.V.T., Munywoki,P.K., Githinji,G., Medley,G.F., Cane,P.A., Kellam,K., Cotten,M. and Nokes,D.J.                                                                                                   |
| EPI_ISL_2575570                                                                                                                                 | J. Craig Venter Institute                                                                                                                                       | J. Craig Venter Institute                                                                                                                                       | Tan,G., Pickett,B., Fedorova,N., Amedeo,P., Hu,L., Christensen,J., Miller,J., Durbin,A., Williams,T., Arumemi,F., Cadiz,C., Alanis,R., Balmseda,A.,<br>Williams,T., Schiller,A., Patel,M., Kubale,J. and Gordon,A. |
| EPI_ISL_2575571                                                                                                                                 | Department of Experimental Modeling and Pathogenesis of<br>Infectious Diseases, Federal Research Center of<br>Fundamental and Translational Medicine            | Department of Experimental Modeling and Pathogenesis of<br>Infectious Diseases, Federal Research Center of<br>Fundamental and Translational Medicine            | Dubovitskiy,N.A., Sobolev,I.A., Kurskaya,O.G., Sharshov,K.A., Anoshina,A.V., Leonova,N.V., Murashkina,T.A., Solomatina,M.V., Derko,A.A., Saroyan,T.A.,<br>Kabilov,M.R., Alikina,T.Y. and Shestopalov,A.M.          |
| EPI_ISL_2575572, EPI_ISL_2575573,<br>EPI_ISL_2575574, EPI_ISL_2575575,<br>EPI_ISL_2575576, EPI_ISL_2575577,<br>EPI_ISL_2575578, EPI_ISL_2575579 | Epidemiology and Demography Department, KEMRI<br>Wellcome Trust Research Collaborative Programme                                                                | Epidemiology and Demography Department, KEMRI<br>Wellcome Trust Research Collaborative Programme                                                                | Agoti,C.N., Phan,M.V.T., Munywoki,P.K., Githinji,G., Medley,G.F., Cane,P.A., Kellam,K., Cotten,M. and Nokes,D.J.                                                                                                   |
| EPI_ISL_2575580, EPI_ISL_2575581,<br>EPI_ISL_2575582, EPI_ISL_2575583,<br>EPI_ISL_2575584, EPI_ISL_2575585,<br>EPI_ISL_2575586, EPI_ISL_2575587 | J. Craig Venter Institute                                                                                                                                       | J. Craig Venter Institute                                                                                                                                       | Tan,G., Pickett,B., Fedorova,N., Amedeo,P., Hu,L., Christensen,J., Miller,J., Durbin,A., Williams,T., Arumemi,F., Cadiz,C., Alanis,R., Balmseda,A.,<br>Williams,T., Schiller,A., Patel,M., Kubale,J. and Gordon,A. |

|                                                                                                                                                                                           |                                                                                                                                                           |                                                                                                                                                           |                                                                                                                                                                                                                 |
|-------------------------------------------------------------------------------------------------------------------------------------------------------------------------------------------|-----------------------------------------------------------------------------------------------------------------------------------------------------------|-----------------------------------------------------------------------------------------------------------------------------------------------------------|-----------------------------------------------------------------------------------------------------------------------------------------------------------------------------------------------------------------|
| EPI_ISL_2575588, EPI_ISL_2575589, EPI_ISL_2575590                                                                                                                                         | Marie Bashir Institute for Infectious Diseases and Biosecurity & Sydney Medical School, The University of Sydney, Westmead Institute for Medical Research | Marie Bashir Institute for Infectious Diseases and Biosecurity & Sydney Medical School, The University of Sydney, Westmead Institute for Medical Research | Eden,J.-S., Kok,J., Dwyer,D.E., Fernandez,M., Carter,I. and Holmes,E.C.                                                                                                                                         |
| EPI_ISL_2575591                                                                                                                                                                           | Epidemiology and Demography Department, KEMRI Wellcome Trust Research Collaborative Programme                                                             | Epidemiology and Demography Department, KEMRI Wellcome Trust Research Collaborative Programme                                                             | Agoti,C.N., Phan,M.V.T., Munywoki,P.K., Githinji,G., Medley,G.F., Cane,P.A., Kellam,K., Cotten,M. and Nokes,D.J.                                                                                                |
| EPI_ISL_2575592                                                                                                                                                                           | Reference Microbiology, Public Health England National Infection Services                                                                                 | Reference Microbiology, Public Health England National Infection Services                                                                                 | Valappil,M., Talts,T., Ellis,J., Sails,A., Eltringham,G., Waugh,S., Gould,K., Harrison,I., Pebody,R. and Zambon,M.                                                                                              |
| EPI_ISL_2575593                                                                                                                                                                           | Kazuya Shirato National Institute of Infectious Diseases, Virology III                                                                                    | Kazuya Shirato National Institute of Infectious Diseases, Virology III                                                                                    | Shirato,K., Sato,K., Dapat,I., Nao,N., Omiya,S., Matsuyama,S., Takeda,M. and Nishimura,H.                                                                                                                       |
| EPI_ISL_2575594, EPI_ISL_2575595, EPI_ISL_2575596                                                                                                                                         | J. Craig Venter Institute                                                                                                                                 | J. Craig Venter Institute                                                                                                                                 | Tan,G., Pickett,B., Fedorova,N., Amedeo,P., Hu,L., Christensen,J., Miller,J., Durbin,A., Williams,T., Arumemi,F., Cadiz,C., Alanis,R., Balmseda,A., Williams,T., Schiller,A., Patel,M., Kubale,J. and Gordon,A. |
| EPI_ISL_2575597, EPI_ISL_2575598, EPI_ISL_2575599, EPI_ISL_2575600                                                                                                                        | Marie Bashir Institute for Infectious Diseases and Biosecurity & Sydney Medical School, The University of Sydney, Westmead Institute for Medical Research | Marie Bashir Institute for Infectious Diseases and Biosecurity & Sydney Medical School, The University of Sydney, Westmead Institute for Medical Research | Eden,J.-S., Kok,J., Dwyer,D.E., Fernandez,M., Carter,I. and Holmes,E.C.                                                                                                                                         |
| EPI_ISL_2575601                                                                                                                                                                           | J. Craig Venter Institute                                                                                                                                 | J. Craig Venter Institute                                                                                                                                 | Tan,G., Pickett,B., Fedorova,N., Amedeo,P., Isom,R., Hu,L., Christensen,J., Miller,J., Novotny,M., Durbin,A., Rocchi,I., Williams,T., Arumemi,F. and Das,S.                                                     |
| EPI_ISL_2575602, EPI_ISL_2575603, EPI_ISL_2575604, EPI_ISL_2575605                                                                                                                        | Marie Bashir Institute for Infectious Diseases and Biosecurity & Sydney Medical School, The University of Sydney, Westmead Institute for Medical Research | Marie Bashir Institute for Infectious Diseases and Biosecurity & Sydney Medical School, The University of Sydney, Westmead Institute for Medical Research | Eden,J.-S., Kok,J., Dwyer,D.E., Fernandez,M., Carter,I. and Holmes,E.C.                                                                                                                                         |
| EPI_ISL_2575606                                                                                                                                                                           | Department of Experimental Modeling and Pathogenesis of Infectious Diseases, Federal Research Center of Fundamental and Translational Medicine            | Department of Experimental Modeling and Pathogenesis of Infectious Diseases, Federal Research Center of Fundamental and Translational Medicine            | Dubovitskiy,N.A., Sobolev,I.A., Kurskaya,O.G., Sharshov,K.A., Anoshina,A.V., Leonova,N.V., Murashkina,T.A., Solomatina,M.V., Derko,A.A., Saroyan,T.A., Kabilov,M.R., Alikina,T.Y. and Shestopalov,A.M.          |
| EPI_ISL_2575607, EPI_ISL_2575608, EPI_ISL_2575609, EPI_ISL_2575610, EPI_ISL_2575611, EPI_ISL_2575612, EPI_ISL_2575613, EPI_ISL_2575614                                                    | Marie Bashir Institute for Infectious Diseases and Biosecurity & Sydney Medical School, The University of Sydney, Westmead Institute for Medical Research | Marie Bashir Institute for Infectious Diseases and Biosecurity & Sydney Medical School, The University of Sydney, Westmead Institute for Medical Research | Eden,J.-S., Kok,J., Dwyer,D.E., Fernandez,M., Carter,I. and Holmes,E.C.                                                                                                                                         |
| EPI_ISL_2575615                                                                                                                                                                           | Department of Experimental Modeling and Pathogenesis of Infectious Diseases, Federal Research Center of Fundamental and Translational Medicine            | Department of Experimental Modeling and Pathogenesis of Infectious Diseases, Federal Research Center of Fundamental and Translational Medicine            | Dubovitskiy,N.A., Sobolev,I.A., Kurskaya,O.G., Sharshov,K.A., Anoshina,A.V., Leonova,N.V., Murashkina,T.A., Solomatina,M.V., Derko,A.A., Saroyan,T.A., Kabilov,M.R., Alikina,T.Y. and Shestopalov,A.M.          |
| EPI_ISL_2575617                                                                                                                                                                           | J. Craig Venter Institute                                                                                                                                 | J. Craig Venter Institute                                                                                                                                 | Tan,G., Pickett,B., Fedorova,N., Amedeo,P., Isom,R., Hu,L., Christensen,J., Miller,J., Novotny,M., Durbin,A., Rocchi,I., Williams,T., Arumemi,F. and Das,S.                                                     |
| EPI_ISL_2575618, EPI_ISL_2575619, EPI_ISL_2575620                                                                                                                                         | J. Craig Venter Institute                                                                                                                                 | J. Craig Venter Institute                                                                                                                                 | Tan,G., Pickett,B., Fedorova,N., Amedeo,P., Hu,L., Christensen,J., Miller,J., Durbin,A., Williams,T., Arumemi,F., Cadiz,C., Alanis,R., Balmseda,A., Williams,T., Schiller,A., Patel,M., Kubale,J. and Gordon,A. |
| EPI_ISL_2575621, EPI_ISL_2575623, EPI_ISL_2577154, EPI_ISL_2577155                                                                                                                        | Marie Bashir Institute for Infectious Diseases and Biosecurity & Sydney Medical School, The University of Sydney, Westmead Institute for Medical Research | Marie Bashir Institute for Infectious Diseases and Biosecurity & Sydney Medical School, The University of Sydney, Westmead Institute for Medical Research | Eden,J.-S., Kok,J., Dwyer,D.E., Fernandez,M., Carter,I. and Holmes,E.C.                                                                                                                                         |
| EPI_ISL_2577156                                                                                                                                                                           | Reference Microbiology, Public Health England National Infection Services                                                                                 | Reference Microbiology, Public Health England National Infection Services                                                                                 | Valappil,M., Talts,T., Ellis,J., Sails,A., Eltringham,G., Waugh,S., Gould,K., Harrison,I., Pebody,R. and Zambon,M.                                                                                              |
| EPI_ISL_2577266, EPI_ISL_2577267, EPI_ISL_2577268, EPI_ISL_2577269, EPI_ISL_2577278, EPI_ISL_2577279, EPI_ISL_2577280, EPI_ISL_2577281, EPI_ISL_2577282, EPI_ISL_2577283, EPI_ISL_2577284 | see above                                                                                                                                                 | see above                                                                                                                                                 | Agoti,C.N., Phan,M.V.T., Munywoki,P.K., Githinji,G., Medley,G.F., Cane,P.A., Kellam,K., Cotten,M. and Nokes,D.J.                                                                                                |
| EPI_ISL_2577285                                                                                                                                                                           | Epidemiology and Demography Department, KEMRI Wellcome Trust Research Collaborative Programme                                                             | Epidemiology and Demography Department, KEMRI Wellcome Trust Research Collaborative Programme                                                             | Tan,G., Pickett,B., Fedorova,N., Amedeo,P., Isom,R., Hu,L., Christensen,J., Miller,J., Novotny,M., Durbin,A., Rocchi,I., Williams,T., Arumemi,F. and Das,S.                                                     |
| EPI_ISL_2577286, EPI_ISL_2577287, EPI_ISL_2577288                                                                                                                                         | J. Craig Venter Institute                                                                                                                                 | J. Craig Venter Institute                                                                                                                                 | Valappil,M., Talts,T., Ellis,J., Sails,A., Eltringham,G., Waugh,S., Gould,K., Harrison,I., Pebody,R. and Zambon,M.                                                                                              |
| EPI_ISL_2577289                                                                                                                                                                           | Reference Microbiology, Public Health England National Infection Services                                                                                 | Reference Microbiology, Public Health England National Infection Services                                                                                 | Tan,G., Pickett,B., Fedorova,N., Amedeo,P., Isom,R., Hu,L., Christensen,J., Miller,J., Novotny,M., Durbin,A., Rocchi,I., Williams,T., Arumemi,F. and Das,S.                                                     |
| EPI_ISL_2577291                                                                                                                                                                           | J. Craig Venter Institute                                                                                                                                 | J. Craig Venter Institute                                                                                                                                 | Eden,J.-S., Kok,J., Dwyer,D.E., Fernandez,M., Carter,I. and Holmes,E.C.                                                                                                                                         |
| EPI_ISL_2577292, EPI_ISL_2577293, EPI_ISL_2577294, EPI_ISL_2577295, EPI_ISL_2577296, EPI_ISL_2577297, EPI_ISL_2577298, EPI_ISL_2577299                                                    | Marie Bashir Institute for Infectious Diseases and Biosecurity & Sydney Medical School, The University of Sydney, Westmead Institute for Medical Research | Marie Bashir Institute for Infectious Diseases and Biosecurity & Sydney Medical School, The University of Sydney, Westmead Institute for Medical Research | Eden,J.-S., Kok,J., Dwyer,D.E., Fernandez,M., Carter,I. and Holmes,E.C.                                                                                                                                         |
| EPI_ISL_2577300                                                                                                                                                                           | Epidemiology and Demography Department, KEMRI Wellcome Trust Research Collaborative Programme                                                             | Epidemiology and Demography Department, KEMRI Wellcome Trust Research Collaborative Programme                                                             | Agoti,C.N., Phan,M.V.T., Munywoki,P.K., Githinji,G., Medley,G.F., Cane,P.A., Kellam,K., Cotten,M. and Nokes,D.J.                                                                                                |
| EPI_ISL_2577301                                                                                                                                                                           | Marie Bashir Institute for Infectious Diseases and Biosecurity & Sydney Medical School, The University of Sydney, Westmead Institute for Medical Research | Marie Bashir Institute for Infectious Diseases and Biosecurity & Sydney Medical School, The University of Sydney, Westmead Institute for Medical Research | Eden,J.-S., Kok,J., Dwyer,D.E., Fernandez,M., Carter,I. and Holmes,E.C.                                                                                                                                         |
| EPI_ISL_2577302, EPI_ISL_2577303, EPI_ISL_2577304, EPI_ISL_2577305, EPI_ISL_2577306, EPI_ISL_2577307                                                                                      | Pediatrics - Infectious Diseases, Medical College of Wisconsin                                                                                            | Pediatrics - Infectious Diseases, Medical College of Wisconsin                                                                                            | Rebuffo-Scheer,C., Bose,M.E., He,J., Khaja,S., Ulatowski,M., Beck,E.T., Fan,J., Kumar,S., Nelson,M.I. and Henrickson,K.J.                                                                                       |
| EPI_ISL_2577308                                                                                                                                                                           | Epidemiology and Demography Department, KEMRI Wellcome Trust Research Collaborative Programme                                                             | Epidemiology and Demography Department, KEMRI Wellcome Trust Research Collaborative Programme                                                             | Agoti,C.N., Phan,M.V.T., Munywoki,P.K., Githinji,G., Medley,G.F., Cane,P.A., Kellam,K., Cotten,M. and Nokes,D.J.                                                                                                |
| EPI_ISL_2577309, EPI_ISL_2577310                                                                                                                                                          | Reference Microbiology, Public Health England National Infection Services                                                                                 | Reference Microbiology, Public Health England National Infection Services                                                                                 | Valappil,M., Talts,T., Ellis,J., Sails,A., Eltringham,G., Waugh,S., Gould,K., Harrison,I., Pebody,R. and Zambon,M.                                                                                              |
| EPI_ISL_2577311, EPI_ISL_2577312                                                                                                                                                          | Michiko Okamoto Graduate School of Medicine, Tohoku University, Virology                                                                                  | Michiko Okamoto Graduate School of Medicine, Tohoku University, Virology                                                                                  | Okamoto,M. and Oshitani,H.                                                                                                                                                                                      |
| EPI_ISL_2577313, EPI_ISL_2577314                                                                                                                                                          | Marie Bashir Institute for Infectious Diseases and Biosecurity & Sydney Medical School, The University of Sydney, Westmead Institute for Medical Research | Marie Bashir Institute for Infectious Diseases and Biosecurity & Sydney Medical School, The University of Sydney, Westmead Institute for Medical Research | Eden,J.-S., Kok,J., Dwyer,D.E., Fernandez,M., Carter,I. and Holmes,E.C.                                                                                                                                         |
| EPI_ISL_2577323                                                                                                                                                                           | Epidemiology and Demography Department, KEMRI Wellcome Trust Research Collaborative Programme                                                             | Epidemiology and Demography Department, KEMRI Wellcome Trust Research Collaborative Programme                                                             | Agoti,C.N., Phan,M.V.T., Munywoki,P.K., Githinji,G., Medley,G.F., Cane,P.A., Kellam,K., Cotten,M. and Nokes,D.J.                                                                                                |
| EPI_ISL_2577324, EPI_ISL_2577325                                                                                                                                                          | Marie Bashir Institute for Infectious Diseases and Biosecurity & Sydney Medical School, The University of Sydney, Westmead Institute for Medical Research | Marie Bashir Institute for Infectious Diseases and Biosecurity & Sydney Medical School, The University of Sydney, Westmead Institute for Medical Research | Eden,J.-S., Kok,J., Dwyer,D.E., Fernandez,M., Carter,I. and Holmes,E.C.                                                                                                                                         |
| EPI_ISL_2577326                                                                                                                                                                           | Reference Microbiology, Public Health England National Infection Services                                                                                 | Reference Microbiology, Public Health England National Infection Services                                                                                 | Valappil,M., Talts,T., Ellis,J., Sails,A., Eltringham,G., Waugh,S., Gould,K., Harrison,I., Pebody,R. and Zambon,M.                                                                                              |
| EPI_ISL_2577327, EPI_ISL_2577328,                                                                                                                                                         | Marie Bashir Institute for Infectious Diseases and Biosecurity                                                                                            | Marie Bashir Institute for Infectious Diseases and Biosecurity                                                                                            | Eden,J.-S., Kok,J., Dwyer,D.E., Fernandez,M., Carter,I. and Holmes,E.C.                                                                                                                                         |





|                                                                                                                                                                                                                                                                                                                                                |                                                                                                                                                                                                                                                            |                                                                                                                                                                                                                                                            |                                                                                                                                                                                                                                                                                            |
|------------------------------------------------------------------------------------------------------------------------------------------------------------------------------------------------------------------------------------------------------------------------------------------------------------------------------------------------|------------------------------------------------------------------------------------------------------------------------------------------------------------------------------------------------------------------------------------------------------------|------------------------------------------------------------------------------------------------------------------------------------------------------------------------------------------------------------------------------------------------------------|--------------------------------------------------------------------------------------------------------------------------------------------------------------------------------------------------------------------------------------------------------------------------------------------|
| EPI_ISL_2577441, EPI_ISL_2577442, EPI_ISL_2577443<br>EPI_ISL_2577444                                                                                                                                                                                                                                                                           | Westmead Institute for Medical Research<br>J. Craig Venter Institute                                                                                                                                                                                       | Westmead Institute for Medical Research<br>J. Craig Venter Institute                                                                                                                                                                                       | Tan,G., Pickett,B., Fedorova,N., Amedeo,P., Hu,L., Christensen,J., Miller,J., Durbin,A., Williams,T., Arumemi,F., Cadiz,C., Alanis,R., Balmseda,A., Williams,T., Schiller,A., Patel,M., Kubale,J. and Gordon,A.<br>Eden,J.-S., Kok,J., Dwyer,D.E., Fernandez,M., Carter,I. and Holmes,E.C. |
| EPI_ISL_2577471, EPI_ISL_2577472, EPI_ISL_2577473, EPI_ISL_2577474, EPI_ISL_2577475, EPI_ISL_2577476, EPI_ISL_2577477, EPI_ISL_2577478, EPI_ISL_2577479, EPI_ISL_2577480<br>EPI_ISL_2577483, EPI_ISL_2577484                                                                                                                                   | Marie Bashir Institute for Infectious Diseases and Biosecurity & Sydney Medical School, The University of Sydney, Westmead Institute for Medical Research<br>Epidemiology and Demography Department, KEMRI Wellcome Trust Research Collaborative Programme | Marie Bashir Institute for Infectious Diseases and Biosecurity & Sydney Medical School, The University of Sydney, Westmead Institute for Medical Research<br>Epidemiology and Demography Department, KEMRI Wellcome Trust Research Collaborative Programme | Agoti,C.N., Phan,M.V.T., Munywoki,P.K., Githinji,G., Medley,G.F., Cane,P.A., Kellam,K., Cotten,M. and Nokes,D.J.<br>Eden,J.-S., Kok,J., Dwyer,D.E., Fernandez,M., Carter,I. and Holmes,E.C.                                                                                                |
| EPI_ISL_2577698, EPI_ISL_2577709, EPI_ISL_2577719, EPI_ISL_2577730, EPI_ISL_2577736, EPI_ISL_2577749, EPI_ISL_2577754<br>EPI_ISL_2577788                                                                                                                                                                                                       | Reference Microbiology, Public Health England National Infection Services<br>J. Craig Venter Institute                                                                                                                                                     | Reference Microbiology, Public Health England National Infection Services<br>J. Craig Venter Institute                                                                                                                                                     | Valappil,M., Tait,T., Ellis,J., Sails,A., Eltringham,G., Waugh,S., Gould,K., Harrison,I., Pebody,R. and Zambon,M.<br>Tan,G., Pickett,B., Fedorova,N., Amedeo,P., Isom,R., Hu,L., Christensen,J., Miller,J., Novotny,M., Durbin,A., Rocchi,I., Williams,T., Arumemi,F. and Das,S.           |
| EPI_ISL_2578154, EPI_ISL_2578157                                                                                                                                                                                                                                                                                                               | Central Laboratory, Guangzhou Women and Children's Medical Center                                                                                                                                                                                          | Central Laboratory, Guangzhou Women and Children's Medical Center                                                                                                                                                                                          | Xie,J.H., Zhu,B., Zhong,J.Y., Chen,Y. and Zhang,Y.Y.<br>Okamoto,M. and Oshitani,H.                                                                                                                                                                                                         |
| EPI_ISL_2578161                                                                                                                                                                                                                                                                                                                                | Marie Bashir Institute for Infectious Diseases and Biosecurity & Sydney Medical School, The University of Sydney, Westmead Institute for Medical Research                                                                                                  | Marie Bashir Institute for Infectious Diseases and Biosecurity & Sydney Medical School, The University of Sydney, Westmead Institute for Medical Research                                                                                                  | Eden,J.-S., Kok,J., Dwyer,D.E., Fernandez,M., Carter,I. and Holmes,E.C.                                                                                                                                                                                                                    |
| EPI_ISL_2578167                                                                                                                                                                                                                                                                                                                                | Marie Bashir Institute for Infectious Diseases and Biosecurity & Sydney Medical School, The University of Sydney, Westmead Institute for Medical Research                                                                                                  | Marie Bashir Institute for Infectious Diseases and Biosecurity & Sydney Medical School, The University of Sydney, Westmead Institute for Medical Research                                                                                                  | Eden,J.-S., Kok,J., Dwyer,D.E., Fernandez,M., Carter,I. and Holmes,E.C.                                                                                                                                                                                                                    |
| EPI_ISL_2578239                                                                                                                                                                                                                                                                                                                                | Marie Bashir Institute for Infectious Diseases and Biosecurity & Sydney Medical School, The University of Sydney, Westmead Institute for Medical Research                                                                                                  | Marie Bashir Institute for Infectious Diseases and Biosecurity & Sydney Medical School, The University of Sydney, Westmead Institute for Medical Research                                                                                                  | Eden,J.-S., Kok,J., Dwyer,D.E., Fernandez,M., Carter,I. and Holmes,E.C.                                                                                                                                                                                                                    |
| EPI_ISL_2578352, EPI_ISL_2578361, EPI_ISL_2578362, EPI_ISL_2578365<br>EPI_ISL_2578381                                                                                                                                                                                                                                                          | J. Craig Venter Institute<br>Marie Bashir Institute for Infectious Diseases and Biosecurity & Sydney Medical School, The University of Sydney, Westmead Institute for Medical Research                                                                     | J. Craig Venter Institute<br>Marie Bashir Institute for Infectious Diseases and Biosecurity & Sydney Medical School, The University of Sydney, Westmead Institute for Medical Research                                                                     | Tan,G., Pickett,B., Fedorova,N., Amedeo,P., Hu,L., Christensen,J., Miller,J., Durbin,A., Williams,T., Arumemi,F., Cadiz,C., Alanis,R., Balmseda,A., Williams,T., Schiller,A., Patel,M., Kubale,J. and Gordon,A.<br>Eden,J.-S., Kok,J., Dwyer,D.E., Fernandez,M., Carter,I. and Holmes,E.C. |
| EPI_ISL_2578661<br>EPI_ISL_2578662                                                                                                                                                                                                                                                                                                             | Pediatrics - Infectious Diseases, Medical College of Wisconsin<br>Beijing Key Laboratory of Etiology of Viral Diseases in Children; Laboratory of Virology, Capital Institute of Pediatrics                                                                | Pediatrics - Infectious Diseases, Medical College of Wisconsin<br>Beijing Key Laboratory of Etiology of Viral Diseases in Children; Laboratory of Virology, Capital Institute of Pediatrics                                                                | Rebuffo-Scheer,C., Bose,M.E., He,J., Khajaa,S., Ulatowski,M., Beck,E.T., Fan,J., Kumar,S., Nelson,M.I. and Henrickson,K.J.<br>Cui,G., Zhu,R., Deng,J., Zhao,L., Sun,Y., Wang,F. and Qian,Y.                                                                                                |
| EPI_ISL_2578663, EPI_ISL_2578664, EPI_ISL_2578665, EPI_ISL_2578666, EPI_ISL_2578667, EPI_ISL_2578668, EPI_ISL_2578669, EPI_ISL_2578670, EPI_ISL_2578671, EPI_ISL_2578672, EPI_ISL_2578673, EPI_ISL_2578674, EPI_ISL_2578675, EPI_ISL_2578676<br>see above                                                                                      | Epidemiology and Demography Department, KEMRI-Wellcome Trust Research Programme                                                                                                                                                                            | Epidemiology and Demography Department, KEMRI-Wellcome Trust Research Programme                                                                                                                                                                            | Otieno,J.R., Kamau,E.M., Oketch,J.W., Ngoi,J.M., Agoti,C.N., Gichuki,A.M., Otieno,G.P., Ngama,M., Cane,P.A., Kellam,P., Cotten,M., Lemey,P. and Nokes,D.J.                                                                                                                                 |
| EPI_ISL_2578677, EPI_ISL_2578678                                                                                                                                                                                                                                                                                                               | Center for Infectious Diseases, School of Public Health, University of Texas Health Science Center                                                                                                                                                         | Center for Infectious Diseases, School of Public Health, University of Texas Health Science Center                                                                                                                                                         | Bahl,J., Hixson,J., Kim,D.-K., Qiu,X., Piedra,P.A., Piedra,F.-A., Avadhanula,V. and Machado,A.A.                                                                                                                                                                                           |
| EPI_ISL_2578679                                                                                                                                                                                                                                                                                                                                | Marie Bashir Institute for Infectious Diseases and Biosecurity & Sydney Medical School, The University of Sydney, Westmead Institute for Medical Research                                                                                                  | Marie Bashir Institute for Infectious Diseases and Biosecurity & Sydney Medical School, The University of Sydney, Westmead Institute for Medical Research                                                                                                  | Eden,J.-S., Kok,J., Dwyer,D.E., Fernandez,M., Carter,I. and Holmes,E.C.                                                                                                                                                                                                                    |
| EPI_ISL_2578680, EPI_ISL_2578681, EPI_ISL_2578682, EPI_ISL_2578683, EPI_ISL_2578684, EPI_ISL_2578685, EPI_ISL_2578686, EPI_ISL_2578687, EPI_ISL_2578688, EPI_ISL_2578689, EPI_ISL_2578690<br>see above                                                                                                                                         | Epidemiology and Demography Department, KEMRI-Wellcome Trust Research Programme                                                                                                                                                                            | Epidemiology and Demography Department, KEMRI-Wellcome Trust Research Programme                                                                                                                                                                            | Otieno,J.R., Kamau,E.M., Oketch,J.W., Ngoi,J.M., Agoti,C.N., Gichuki,A.M., Otieno,G.P., Ngama,M., Cane,P.A., Kellam,P., Cotten,M., Lemey,P. and Nokes,D.J.                                                                                                                                 |
| EPI_ISL_2578691                                                                                                                                                                                                                                                                                                                                | Department of Pediatrics, Center of Excellence in Clinical Virology, Chulalongkorn                                                                                                                                                                         | Department of Pediatrics, Center of Excellence in Clinical Virology, Chulalongkorn                                                                                                                                                                         | Thongpan,I.                                                                                                                                                                                                                                                                                |
| EPI_ISL_2578692                                                                                                                                                                                                                                                                                                                                | Center for Infectious Diseases, School of Public Health, University of Texas Health Science Center                                                                                                                                                         | Center for Infectious Diseases, School of Public Health, University of Texas Health Science Center                                                                                                                                                         | Bahl,J., Hixson,J., Kim,D.-K., Qiu,X., Piedra,P.A., Piedra,F.-A., Avadhanula,V. and Machado,A.A.                                                                                                                                                                                           |
| EPI_ISL_2578693, EPI_ISL_2578694, EPI_ISL_2578695, EPI_ISL_2578696, EPI_ISL_2578697, EPI_ISL_2578698, EPI_ISL_2578699, EPI_ISL_2578700, EPI_ISL_2578701, EPI_ISL_2578702, EPI_ISL_2578703, EPI_ISL_2578704, EPI_ISL_2578705, EPI_ISL_2578706, EPI_ISL_2578707, EPI_ISL_2578708, EPI_ISL_2578709, EPI_ISL_2578710, EPI_ISL_2578711<br>see above | Epidemiology and Demography Department, KEMRI-Wellcome Trust Research Programme                                                                                                                                                                            | Epidemiology and Demography Department, KEMRI-Wellcome Trust Research Programme                                                                                                                                                                            | Otieno,J.R., Kamau,E.M., Oketch,J.W., Ngoi,J.M., Agoti,C.N., Gichuki,A.M., Otieno,G.P., Ngama,M., Cane,P.A., Kellam,P., Cotten,M., Lemey,P. and Nokes,D.J.                                                                                                                                 |
| EPI_ISL_2578712                                                                                                                                                                                                                                                                                                                                | Pediatrics, University of New Mexico                                                                                                                                                                                                                       | Pediatrics, University of New Mexico                                                                                                                                                                                                                       | Kothari,A., Kennedy,J.L., Schwalm,K.C., Putt,C., Denson,J.L. and Dinwiddie,D.L.                                                                                                                                                                                                            |
| EPI_ISL_2578713, EPI_ISL_2578714                                                                                                                                                                                                                                                                                                               | Center for Infectious Diseases, School of Public Health, University of Texas Health Science Center                                                                                                                                                         | Center for Infectious Diseases, School of Public Health, University of Texas Health Science Center                                                                                                                                                         | Bahl,J., Hixson,J., Kim,D.-K., Qiu,X., Piedra,P.A., Piedra,F.-A., Avadhanula,V. and Machado,A.A.                                                                                                                                                                                           |
| EPI_ISL_2578715, EPI_ISL_2578716, EPI_ISL_2578717                                                                                                                                                                                                                                                                                              | Marie Bashir Institute for Infectious Diseases and Biosecurity & Sydney Medical School, The University of Sydney, Westmead Institute for Medical Research                                                                                                  | Marie Bashir Institute for Infectious Diseases and Biosecurity & Sydney Medical School, The University of Sydney, Westmead Institute for Medical Research                                                                                                  | Eden,J.-S., Kok,J., Dwyer,D.E., Fernandez,M., Carter,I. and Holmes,E.C.                                                                                                                                                                                                                    |
| EPI_ISL_2578718, EPI_ISL_2578719, EPI_ISL_2578720, EPI_ISL_2578721, EPI_ISL_2578722, EPI_ISL_2578723, EPI_ISL_2578724, EPI_ISL_2578725, EPI_ISL_2578726, EPI_ISL_2578727, EPI_ISL_2578728, EPI_ISL_2578729, EPI_ISL_2578730, EPI_ISL_2578731, EPI_ISL_2578732, EPI_ISL_2578733, EPI_ISL_2578734<br>see above                                   | Epidemiology and Demography Department, KEMRI-Wellcome Trust Research Programme                                                                                                                                                                            | Epidemiology and Demography Department, KEMRI-Wellcome Trust Research Programme                                                                                                                                                                            | Otieno,J.R., Kamau,E.M., Oketch,J.W., Ngoi,J.M., Agoti,C.N., Gichuki,A.M., Otieno,G.P., Ngama,M., Cane,P.A., Kellam,P., Cotten,M., Lemey,P. and Nokes,D.J.                                                                                                                                 |
| EPI_ISL_2578767, EPI_ISL_2578768                                                                                                                                                                                                                                                                                                               | Marie Bashir Institute for Infectious Diseases and Biosecurity & Sydney Medical School, The University of Sydney, Westmead Institute for Medical Research                                                                                                  | Marie Bashir Institute for Infectious Diseases and Biosecurity & Sydney Medical School, The University of Sydney, Westmead Institute for Medical Research                                                                                                  | Eden,J.-S., Kok,J., Dwyer,D.E., Fernandez,M., Carter,I. and Holmes,E.C.                                                                                                                                                                                                                    |
| EPI_ISL_2578769, EPI_ISL_2578770,                                                                                                                                                                                                                                                                                                              | Epidemiology and Demography Department,                                                                                                                                                                                                                    | Epidemiology and Demography Department,                                                                                                                                                                                                                    | Otieno,J.R., Kamau,E.M., Oketch,J.W., Ngoi,J.M., Agoti,C.N., Gichuki,A.M., Otieno,G.P., Ngama,M., Cane,P.A., Kellam,P., Cotten,M., Lemey,P. and Nokes,D.J.                                                                                                                                 |

|                                                                                                                                                                                           |                                                                                                                                                                                                                                                                                                                                                                                                               |                                                                                                                                                                                                                                                                                                                                                                                                               |                                                                                                                                                                                                                                                                                                                                                                                                                                                                                                                                                                                                                                                                                                                                                           |
|-------------------------------------------------------------------------------------------------------------------------------------------------------------------------------------------|---------------------------------------------------------------------------------------------------------------------------------------------------------------------------------------------------------------------------------------------------------------------------------------------------------------------------------------------------------------------------------------------------------------|---------------------------------------------------------------------------------------------------------------------------------------------------------------------------------------------------------------------------------------------------------------------------------------------------------------------------------------------------------------------------------------------------------------|-----------------------------------------------------------------------------------------------------------------------------------------------------------------------------------------------------------------------------------------------------------------------------------------------------------------------------------------------------------------------------------------------------------------------------------------------------------------------------------------------------------------------------------------------------------------------------------------------------------------------------------------------------------------------------------------------------------------------------------------------------------|
| EPI_ISL_2578771, EPI_ISL_2578772, EPI_ISL_2578773, EPI_ISL_2578774, EPI_ISL_2578775, EPI_ISL_2578776                                                                                      | KEMRI-Wellcome Trust Research Programme                                                                                                                                                                                                                                                                                                                                                                       | KEMRI-Wellcome Trust Research Programme                                                                                                                                                                                                                                                                                                                                                                       | Nokes,D.J.                                                                                                                                                                                                                                                                                                                                                                                                                                                                                                                                                                                                                                                                                                                                                |
| EPI_ISL_2578777, EPI_ISL_2578778                                                                                                                                                          | J. Craig Venter Institute                                                                                                                                                                                                                                                                                                                                                                                     | J. Craig Venter Institute                                                                                                                                                                                                                                                                                                                                                                                     | Tan,G., Pickett,B., Fedorova,N., Amedeo,P., Hu,L., Christensen,J., Miller,J., Durbin,A., Williams,T., Arumemi,F., Cadiz,C., Alanis,R., Balmseda,A., Wiliams,T., Schiller,A., Patel,M., Kubale,J. and Gordon,A.                                                                                                                                                                                                                                                                                                                                                                                                                                                                                                                                            |
| EPI_ISL_2578779, EPI_ISL_2578780<br>EPI_ISL_2578787                                                                                                                                       | Virology, Graduate School of Medicine, Tohoku University<br>Department of Pediatrics, Center of Excellence in Clinical Virology, Chulalongkorn                                                                                                                                                                                                                                                                | Virology, Graduate School of Medicine, Tohoku University<br>Department of Pediatrics, Center of Excellence in Clinical Virology, Chulalongkorn                                                                                                                                                                                                                                                                | Malasao,R., Furuse,Y., Okamoto,M., Dapat,C., Saito,M., Saito-Obata,M., Tamaki,R., Segubre-Mercado,E., Lupisan,S. and Oshitani,H.<br>Thongpan,I.                                                                                                                                                                                                                                                                                                                                                                                                                                                                                                                                                                                                           |
| EPI_ISL_2578788, EPI_ISL_2578789                                                                                                                                                          | Marie Bashir Institute for Infectious Diseases and Biosecurity & Sydney Medical School, The University of Sydney, Westmead Institute for Medical Research                                                                                                                                                                                                                                                     | Marie Bashir Institute for Infectious Diseases and Biosecurity & Sydney Medical School, The University of Sydney, Westmead Institute for Medical Research                                                                                                                                                                                                                                                     | Eden,J.-S., Kok,J., Dwyer,D.E., Fernandez,M., Carter,I. and Holmes,E.C.                                                                                                                                                                                                                                                                                                                                                                                                                                                                                                                                                                                                                                                                                   |
| EPI_ISL_2578799, EPI_ISL_2578800, EPI_ISL_2578801<br>EPI_ISL_2578802<br>EPI_ISL_2578803                                                                                                   | Epidemiology and Demography Department, KEMRI-Wellcome Trust Research Programme<br>Virology, Graduate School of Medicine, Tohoku University<br>Department of Pediatrics, Center of Excellence in Clinical Virology, Chulalongkorn                                                                                                                                                                             | Epidemiology and Demography Department, KEMRI-Wellcome Trust Research Programme<br>Virology, Graduate School of Medicine, Tohoku University<br>Department of Pediatrics, Center of Excellence in Clinical Virology, Chulalongkorn                                                                                                                                                                             | Otieno,J.R., Kamau,E.M., Oketch,J.W., Ngoi,J.M., Agoti,C.N., Gichuki,A.M., Otieno,G.P., Ngama,M., Cane,P.A., Kellam,P., Cotten,M., Lemeys,P. and Nokes,D.J.<br>Malasao,R., Furuse,Y., Okamoto,M., Dapat,C., Saito,M., Saito-Obata,M., Tamaki,R., Segubre-Mercado,E., Lupisan,S. and Oshitani,H.<br>Thongpan,I.                                                                                                                                                                                                                                                                                                                                                                                                                                            |
| EPI_ISL_2578804, EPI_ISL_2578805, EPI_ISL_2578806, EPI_ISL_2578807, EPI_ISL_2578808                                                                                                       | Epidemiology and Demography Department, KEMRI-Wellcome Trust Research Programme                                                                                                                                                                                                                                                                                                                               | Epidemiology and Demography Department, KEMRI-Wellcome Trust Research Programme                                                                                                                                                                                                                                                                                                                               | Otieno,J.R., Kamau,E.M., Oketch,J.W., Ngoi,J.M., Agoti,C.N., Gichuki,A.M., Otieno,G.P., Ngama,M., Cane,P.A., Kellam,P., Cotten,M., Lemeys,P. and Nokes,D.J.                                                                                                                                                                                                                                                                                                                                                                                                                                                                                                                                                                                               |
| EPI_ISL_2578809, EPI_ISL_2578810<br>EPI_ISL_2578811, EPI_ISL_2578812, EPI_ISL_2578813                                                                                                     | Virology, Graduate School of Medicine, Tohoku University<br>Marie Bashir Institute for Infectious Diseases and Biosecurity & Sydney Medical School, The University of Sydney, Westmead Institute for Medical Research                                                                                                                                                                                         | Virology, Graduate School of Medicine, Tohoku University<br>Marie Bashir Institute for Infectious Diseases and Biosecurity & Sydney Medical School, The University of Sydney, Westmead Institute for Medical Research                                                                                                                                                                                         | Malasao,R., Furuse,Y., Okamoto,M., Dapat,C., Saito,M., Saito-Obata,M., Tamaki,R., Segubre-Mercado,E., Lupisan,S. and Oshitani,H.<br>Eden,J.-S., Kok,J., Dwyer,D.E., Fernandez,M., Carter,I. and Holmes,E.C.                                                                                                                                                                                                                                                                                                                                                                                                                                                                                                                                               |
| EPI_ISL_2578814, EPI_ISL_2578815<br>EPI_ISL_2578816                                                                                                                                       | Epidemiology and Demography Department, KEMRI-Wellcome Trust Research Programme<br>J. Craig Venter Institute                                                                                                                                                                                                                                                                                                  | Epidemiology and Demography Department, KEMRI-Wellcome Trust Research Programme<br>J. Craig Venter Institute                                                                                                                                                                                                                                                                                                  | Otieno,J.R., Kamau,E.M., Oketch,J.W., Ngoi,J.M., Agoti,C.N., Gichuki,A.M., Otieno,G.P., Ngama,M., Cane,P.A., Kellam,P., Cotten,M., Lemeys,P. and Nokes,D.J.<br>Tan,G., Pickett,B., Fedorova,N., Amedeo,P., Hu,L., Christensen,J., Miller,J., Durbin,A., Williams,T., Arumemi,F., Cadiz,C., Alanis,R., Balmseda,A., Wiliams,T., Schiller,A., Patel,M., Kubale,J. and Gordon,A.                                                                                                                                                                                                                                                                                                                                                                             |
| EPI_ISL_2578817                                                                                                                                                                           | Department of Pediatrics, Center of Excellence in Clinical Virology, Chulalongkorn                                                                                                                                                                                                                                                                                                                            | Department of Pediatrics, Center of Excellence in Clinical Virology, Chulalongkorn                                                                                                                                                                                                                                                                                                                            | Thongpan,I.                                                                                                                                                                                                                                                                                                                                                                                                                                                                                                                                                                                                                                                                                                                                               |
| EPI_ISL_2578818, EPI_ISL_2578819, EPI_ISL_2578820, EPI_ISL_2578821<br>EPI_ISL_2578825, EPI_ISL_2578826                                                                                    | Epidemiology and Demography Department, KEMRI-Wellcome Trust Research Programme<br>Marie Bashir Institute for Infectious Diseases and Biosecurity & Sydney Medical School, The University of Sydney, Westmead Institute for Medical Research                                                                                                                                                                  | Epidemiology and Demography Department, KEMRI-Wellcome Trust Research Programme<br>Marie Bashir Institute for Infectious Diseases and Biosecurity & Sydney Medical School, The University of Sydney, Westmead Institute for Medical Research                                                                                                                                                                  | Otieno,J.R., Kamau,E.M., Oketch,J.W., Ngoi,J.M., Agoti,C.N., Gichuki,A.M., Otieno,G.P., Ngama,M., Cane,P.A., Kellam,P., Cotten,M., Lemeys,P. and Nokes,D.J.<br>Eden,J.-S., Kok,J., Dwyer,D.E., Fernandez,M., Carter,I. and Holmes,E.C.                                                                                                                                                                                                                                                                                                                                                                                                                                                                                                                    |
| EPI_ISL_2579776                                                                                                                                                                           | Center for Infectious Diseases, School of Public Health, University of Texas Health Science Center                                                                                                                                                                                                                                                                                                            | Center for Infectious Diseases, School of Public Health, University of Texas Health Science Center                                                                                                                                                                                                                                                                                                            | Bahl,J., Hixson,J., Kim,D.-K., Qiu,X., Piedra,P.A., Piedra,F.-A., Avadhanula,V. and Machado,A.A.                                                                                                                                                                                                                                                                                                                                                                                                                                                                                                                                                                                                                                                          |
| EPI_ISL_2579857                                                                                                                                                                           | Influenza Group, National Institute of Virology                                                                                                                                                                                                                                                                                                                                                               | Influenza Group, National Institute of Virology                                                                                                                                                                                                                                                                                                                                                               | Choudhary,M.L., Wadhwa,B., Jadhav,S.M., Chadha,M.S. and Mourya,D.T.                                                                                                                                                                                                                                                                                                                                                                                                                                                                                                                                                                                                                                                                                       |
| EPI_ISL_2579858, EPI_ISL_2579859, EPI_ISL_2579860                                                                                                                                         | Center for Infectious Diseases, School of Public Health, University of Texas Health Science Center                                                                                                                                                                                                                                                                                                            | Center for Infectious Diseases, School of Public Health, University of Texas Health Science Center                                                                                                                                                                                                                                                                                                            | Bahl,J., Hixson,J., Kim,D.-K., Qiu,X., Piedra,P.A., Piedra,F.-A., Avadhanula,V. and Machado,A.A.                                                                                                                                                                                                                                                                                                                                                                                                                                                                                                                                                                                                                                                          |
| EPI_ISL_2579886, EPI_ISL_2579887, EPI_ISL_2579888, EPI_ISL_2579889, EPI_ISL_2579890, EPI_ISL_2579891, EPI_ISL_2579892, EPI_ISL_2579894, EPI_ISL_2579895, EPI_ISL_2579896, EPI_ISL_2579897 | Broad Institute of MIT & Harvard                                                                                                                                                                                                                                                                                                                                                                              | Broad Institute of MIT & Harvard                                                                                                                                                                                                                                                                                                                                                                              | Newman,R.M., Zody,M.C., DeVincenzo,J.P., Grad,Y., Lipsitch,M., Murphy,R., Fitzgerald,M., Young,S., Gargeya,S., Poon,T.W., Charlebois,P., Weiner,B., Yang,X., Piper,M.E., McCowan,C., Ireland,A., Levin,J., Malboeuf,C., Qu,J., Chapman,S.B., Murphy,C., Wortman,J., Nusbbaum,C. and Birren,B.<br>Shrivastava,S., Halpin,R.A., Puri,V., Fedorova,N.B., Stockwell,T., Amedeo,P., Katzel,D., Schobel,S., Pickett,B.E., Moore,M., Chappell,J., Larkin,E., Wentworth,D.E., Anderson,L.J. and Hartent,T.                                                                                                                                                                                                                                                        |
| EPI_ISL_2579900                                                                                                                                                                           | J. Craig Venter Institute                                                                                                                                                                                                                                                                                                                                                                                     | J. Craig Venter Institute                                                                                                                                                                                                                                                                                                                                                                                     | Hamdan,F., Ezzeddine,A., Elbahesh,H. and Zaraket,H.                                                                                                                                                                                                                                                                                                                                                                                                                                                                                                                                                                                                                                                                                                       |
| EPI_ISL_2582147                                                                                                                                                                           | Experimental Pathology, Immunology, and Microbiology, American University of Beirut                                                                                                                                                                                                                                                                                                                           | Experimental Pathology, Immunology, and Microbiology, American University of Beirut                                                                                                                                                                                                                                                                                                                           | Otieno,J.R., Kamau,E.M., Oketch,J.W., Ngoi,J.M., Agoti,C.N., Gichuki,A.M., Otieno,G.P., Ngama,M., Cane,P.A., Kellam,P., Cotten,M., Lemeys,P. and Nokes,D.J.                                                                                                                                                                                                                                                                                                                                                                                                                                                                                                                                                                                               |
| EPI_ISL_2582157, EPI_ISL_2582160, EPI_ISL_2582161<br>EPI_ISL_2582166<br>EPI_ISL_2582167<br>EPI_ISL_2582169<br>EPI_ISL_2582173<br>EPI_ISL_2582176<br>EPI_ISL_2582177<br>EPI_ISL_2582180    | Epidemiology and Demography Department, KEMRI-Wellcome Trust Research Programme<br>Virology, Graduate School of Medicine, Tohoku University<br>Lab Medicine, UW<br>Pediatrics - Infectious Diseases, Medical College of Wisconsin<br>Virology, Graduate School of Medicine, Tohoku University<br>Laboratory Medicine, UW Virology<br>Pediatrics, University of New Mexico<br>Broad Institute of MIT & Harvard | Epidemiology and Demography Department, KEMRI-Wellcome Trust Research Programme<br>Virology, Graduate School of Medicine, Tohoku University<br>Lab Medicine, UW<br>Pediatrics - Infectious Diseases, Medical College of Wisconsin<br>Virology, Graduate School of Medicine, Tohoku University<br>Laboratory Medicine, UW Virology<br>Pediatrics, University of New Mexico<br>Broad Institute of MIT & Harvard | Malasao,R., Furuse,Y., Okamoto,M., Dapat,C., Saito,M., Saito-Obata,M., Tamaki,R., Segubre-Mercado,E., Lupisan,S. and Oshitani,H.<br>Greninger,A.L., Makhosus,N., Kuypers,J.M., Shean,R.C. and Jerome,K.R.<br>Rebuffo-Scheer,C., Bose,M.E., He,J., Khajia,S., Ulatowski,M., Beck,E.T., Fan,J., Kumar,S., Nelson,M.I. and Henrickson,K.J.<br>Malasao,R., Furuse,Y., Okamoto,M., Dapat,C., Saito,M., Saito-Obata,M., Tamaki,R., Segubre-Mercado,E., Lupisan,S. and Oshitani,H.<br>Lin,M.J., Tait,A. and Greninger,A.L.<br>Kothari,A., Kennedy,J.L., Schwalm,K.C., Putt,C., Denson,J.L. and Dinwiddie,D.L.                                                                                                                                                    |
| EPI_ISL_2582181, EPI_ISL_2582183<br>EPI_ISL_2582187, EPI_ISL_2582196<br>EPI_ISL_2582197<br>EPI_ISL_2582201<br>EPI_ISL_2582221                                                             | Virology, Graduate School of Medicine, Tohoku University<br>J. Craig Venter Institute<br>Lab Medicine, UW<br>Epidemiology and Demography Department, KEMRI-Wellcome Trust Research Programme<br>J. Craig Venter Institute                                                                                                                                                                                     | Virology, Graduate School of Medicine, Tohoku University<br>J. Craig Venter Institute<br>Lab Medicine, UW<br>Epidemiology and Demography Department, KEMRI-Wellcome Trust Research Programme<br>J. Craig Venter Institute                                                                                                                                                                                     | Malasao,R., Furuse,Y., Okamoto,M., Dapat,C., Saito,M., Saito-Obata,M., Tamaki,R., Segubre-Mercado,E., Lupisan,S. and Oshitani,H.<br>Tan,G., Pickett,B., Fedorova,N., Amedeo,P., Isom,R., Hu,L., Christensen,J., Miller,J., Novotny,M., Durbin,A., Rocchi,I., Williams,T., Arumemi,F. and Das,S.<br>Greninger,A.L., Makhosus,N., Kuypers,J.M., Shean,R.C. and Jerome,K.R.<br>Otieno,J.R., Kamau,E.M., Oketch,J.W., Ngoi,J.M., Agoti,C.N., Gichuki,A.M., Otieno,G.P., Ngama,M., Cane,P.A., Kellam,P., Cotten,M., Lemeys,P. and Nokes,D.J.<br>Tan,G., Pickett,B., Fedorova,N., Amedeo,P., Hu,L., Christensen,J., Miller,J., Durbin,A., Williams,T., Arumemi,F., Cadiz,C., Alanis,R., Balmseda,A., Wiliams,T., Schiller,A., Patel,M., Kubale,J. and Gordon,A. |
| EPI_ISL_2582223, EPI_ISL_2582226, EPI_ISL_2582227                                                                                                                                         | Marie Bashir Institute for Infectious Diseases and Biosecurity & Sydney Medical School, The University of Sydney, Westmead Institute for Medical Research                                                                                                                                                                                                                                                     | Marie Bashir Institute for Infectious Diseases and Biosecurity & Sydney Medical School, The University of Sydney, Westmead Institute for Medical Research                                                                                                                                                                                                                                                     | Eden,J.-S., Kok,J., Dwyer,D.E., Fernandez,M., Carter,I. and Holmes,E.C.                                                                                                                                                                                                                                                                                                                                                                                                                                                                                                                                                                                                                                                                                   |
| EPI_ISL_2582230, EPI_ISL_2582231<br>EPI_ISL_2582233                                                                                                                                       | J. Craig Venter Institute<br>Laboratory Medicine, UW Virology                                                                                                                                                                                                                                                                                                                                                 | J. Craig Venter Institute<br>Laboratory Medicine, UW Virology                                                                                                                                                                                                                                                                                                                                                 | Tan,G., Pickett,B., Fedorova,N., Amedeo,P., Hu,L., Christensen,J., Miller,J., Durbin,A., Williams,T., Arumemi,F., Cadiz,C., Alanis,R., Balmseda,A., Wiliams,T., Schiller,A., Patel,M., Kubale,J. and Gordon,A.<br>Lin,M.J., Tait,A. and Greninger,A.L.                                                                                                                                                                                                                                                                                                                                                                                                                                                                                                    |

|                                                                                                                                                                                                                                                                                                                                                                                                                                                                                                                                                                                                                                                                                                                                                                                                                                                                                                                                                                                                                                                                                                                                                                                                                                                                                                                                                                                                                                                                                                                                                                                                                                                                                                                                                   |                                                                                                                                                           |                                                                                                                                                           |                                                                                                                                                                                                                                                                                              |
|---------------------------------------------------------------------------------------------------------------------------------------------------------------------------------------------------------------------------------------------------------------------------------------------------------------------------------------------------------------------------------------------------------------------------------------------------------------------------------------------------------------------------------------------------------------------------------------------------------------------------------------------------------------------------------------------------------------------------------------------------------------------------------------------------------------------------------------------------------------------------------------------------------------------------------------------------------------------------------------------------------------------------------------------------------------------------------------------------------------------------------------------------------------------------------------------------------------------------------------------------------------------------------------------------------------------------------------------------------------------------------------------------------------------------------------------------------------------------------------------------------------------------------------------------------------------------------------------------------------------------------------------------------------------------------------------------------------------------------------------------|-----------------------------------------------------------------------------------------------------------------------------------------------------------|-----------------------------------------------------------------------------------------------------------------------------------------------------------|----------------------------------------------------------------------------------------------------------------------------------------------------------------------------------------------------------------------------------------------------------------------------------------------|
| EPI_ISL_2582235, EPI_ISL_2582238                                                                                                                                                                                                                                                                                                                                                                                                                                                                                                                                                                                                                                                                                                                                                                                                                                                                                                                                                                                                                                                                                                                                                                                                                                                                                                                                                                                                                                                                                                                                                                                                                                                                                                                  | J. Craig Venter Institute                                                                                                                                 | J. Craig Venter Institute                                                                                                                                 | Tan,G., Pickett,B., Fedorova,N., Amedeo,P., Hu,L., Christensen,J., Miller,J., Durbin,A., Williams,T., Arumemi,F., Cadiz,C., Alanis,R., Balmseda,A., Williams,T., Schiller,A., Patel,M., Kubale,J. and Gordon,A.                                                                              |
| EPI_ISL_2582239, EPI_ISL_2582241, EPI_ISL_2582244                                                                                                                                                                                                                                                                                                                                                                                                                                                                                                                                                                                                                                                                                                                                                                                                                                                                                                                                                                                                                                                                                                                                                                                                                                                                                                                                                                                                                                                                                                                                                                                                                                                                                                 | Marie Bashir Institute for Infectious Diseases and Biosecurity & Sydney Medical School, The University of Sydney, Westmead Institute for Medical Research | Marie Bashir Institute for Infectious Diseases and Biosecurity & Sydney Medical School, The University of Sydney, Westmead Institute for Medical Research | Eden,J.-S., Kok,J., Dwyer,D.E., Fernandez,M., Carter,I. and Holmes,E.C.                                                                                                                                                                                                                      |
| EPI_ISL_2582246                                                                                                                                                                                                                                                                                                                                                                                                                                                                                                                                                                                                                                                                                                                                                                                                                                                                                                                                                                                                                                                                                                                                                                                                                                                                                                                                                                                                                                                                                                                                                                                                                                                                                                                                   | Pediatrics, University of New Mexico                                                                                                                      | Pediatrics, University of New Mexico                                                                                                                      | Kothari,A., Kennedy,J.L., Schwalm,K.C., Putt,C., Denson,J.L. and Dinwiddie,D.L.                                                                                                                                                                                                              |
| EPI_ISL_2582247                                                                                                                                                                                                                                                                                                                                                                                                                                                                                                                                                                                                                                                                                                                                                                                                                                                                                                                                                                                                                                                                                                                                                                                                                                                                                                                                                                                                                                                                                                                                                                                                                                                                                                                                   | Laboratory Medicine, UW Virology                                                                                                                          | Laboratory Medicine, UW Virology                                                                                                                          | Lin,M.J., Tait,A. and Greninger,A.L.                                                                                                                                                                                                                                                         |
| EPI_ISL_2582250, EPI_ISL_2582251, EPI_ISL_2582253                                                                                                                                                                                                                                                                                                                                                                                                                                                                                                                                                                                                                                                                                                                                                                                                                                                                                                                                                                                                                                                                                                                                                                                                                                                                                                                                                                                                                                                                                                                                                                                                                                                                                                 | Marie Bashir Institute for Infectious Diseases and Biosecurity & Sydney Medical School, The University of Sydney, Westmead Institute for Medical Research | Marie Bashir Institute for Infectious Diseases and Biosecurity & Sydney Medical School, The University of Sydney, Westmead Institute for Medical Research | Eden,J.-S., Kok,J., Dwyer,D.E., Fernandez,M., Carter,I. and Holmes,E.C.                                                                                                                                                                                                                      |
| EPI_ISL_2582256, EPI_ISL_2582257, EPI_ISL_2582260                                                                                                                                                                                                                                                                                                                                                                                                                                                                                                                                                                                                                                                                                                                                                                                                                                                                                                                                                                                                                                                                                                                                                                                                                                                                                                                                                                                                                                                                                                                                                                                                                                                                                                 | Epidemiology and Demography Department, KEMRI-Wellcome Trust Research Programme                                                                           | Epidemiology and Demography Department, KEMRI-Wellcome Trust Research Programme                                                                           | Otieno,J.R., Kamau,E.M., Oketch,J.W., Ngoi,J.M., Agoti,C.N., Gichuki,A.M., Otieno,G.P., Ngama,M., Cane,P.A., Kellam,P., Cotten,M., Lemey,P. and Nokes,D.J.                                                                                                                                   |
| EPI_ISL_2582261                                                                                                                                                                                                                                                                                                                                                                                                                                                                                                                                                                                                                                                                                                                                                                                                                                                                                                                                                                                                                                                                                                                                                                                                                                                                                                                                                                                                                                                                                                                                                                                                                                                                                                                                   | Pediatrics, University of New Mexico                                                                                                                      | Pediatrics, University of New Mexico                                                                                                                      | Kothari,A., Kennedy,J.L., Schwalm,K.C., Putt,C., Denson,J.L. and Dinwiddie,D.L.                                                                                                                                                                                                              |
| EPI_ISL_2582264, EPI_ISL_2582265                                                                                                                                                                                                                                                                                                                                                                                                                                                                                                                                                                                                                                                                                                                                                                                                                                                                                                                                                                                                                                                                                                                                                                                                                                                                                                                                                                                                                                                                                                                                                                                                                                                                                                                  | Marie Bashir Institute for Infectious Diseases and Biosecurity & Sydney Medical School, The University of Sydney, Westmead Institute for Medical Research | Marie Bashir Institute for Infectious Diseases and Biosecurity & Sydney Medical School, The University of Sydney, Westmead Institute for Medical Research | Eden,J.-S., Kok,J., Dwyer,D.E., Fernandez,M., Carter,I. and Holmes,E.C.                                                                                                                                                                                                                      |
| EPI_ISL_2582267                                                                                                                                                                                                                                                                                                                                                                                                                                                                                                                                                                                                                                                                                                                                                                                                                                                                                                                                                                                                                                                                                                                                                                                                                                                                                                                                                                                                                                                                                                                                                                                                                                                                                                                                   | Epidemiology and Demography Department, KEMRI-Wellcome Trust Research Programme                                                                           | Epidemiology and Demography Department, KEMRI-Wellcome Trust Research Programme                                                                           | Otieno,J.R., Kamau,E.M., Oketch,J.W., Ngoi,J.M., Agoti,C.N., Gichuki,A.M., Otieno,G.P., Ngama,M., Cane,P.A., Kellam,P., Cotten,M., Lemey,P. and Nokes,D.J.                                                                                                                                   |
| EPI_ISL_2582271                                                                                                                                                                                                                                                                                                                                                                                                                                                                                                                                                                                                                                                                                                                                                                                                                                                                                                                                                                                                                                                                                                                                                                                                                                                                                                                                                                                                                                                                                                                                                                                                                                                                                                                                   | J. Craig Venter Institute                                                                                                                                 | J. Craig Venter Institute                                                                                                                                 | Tan,G., Pickett,B., Fedorova,N., Amedeo,P., Hu,L., Christensen,J., Miller,J., Durbin,A., Williams,T., Arumemi,F., Cadiz,C., Alanis,R., Balmseda,A., Williams,T., Schiller,A., Patel,M., Kubale,J. and Gordon,A.                                                                              |
| EPI_ISL_2582274, EPI_ISL_2582275, EPI_ISL_2582278                                                                                                                                                                                                                                                                                                                                                                                                                                                                                                                                                                                                                                                                                                                                                                                                                                                                                                                                                                                                                                                                                                                                                                                                                                                                                                                                                                                                                                                                                                                                                                                                                                                                                                 | Department of Experimental Modeling and Pathogenesis of Infectious Diseases, Federal Research Center of Fundamental and Translational Medicine            | Department of Experimental Modeling and Pathogenesis of Infectious Diseases, Federal Research Center of Fundamental and Translational Medicine            | Dubovitskiy,N.A., Sobolev,I.A., Kurskaya,O.G., Sharshov,K.A., Anoshina,A.V., Leonova,N.V., Murashkina,T.A., Solomatina,M.V., Derko,A.A., Saroyan,T.A., Kabilov,M.R., Alikina,T.Y. and Shestopalov,A.M.                                                                                       |
| EPI_ISL_2582279, EPI_ISL_2582281, EPI_ISL_2582284                                                                                                                                                                                                                                                                                                                                                                                                                                                                                                                                                                                                                                                                                                                                                                                                                                                                                                                                                                                                                                                                                                                                                                                                                                                                                                                                                                                                                                                                                                                                                                                                                                                                                                 | Epidemiology and Demography Department, KEMRI-Wellcome Trust Research Programme                                                                           | Epidemiology and Demography Department, KEMRI-Wellcome Trust Research Programme                                                                           | Otieno,J.R., Kamau,E.M., Oketch,J.W., Ngoi,J.M., Agoti,C.N., Gichuki,A.M., Otieno,G.P., Ngama,M., Cane,P.A., Kellam,P., Cotten,M., Lemey,P. and Nokes,D.J.                                                                                                                                   |
| EPI_ISL_2582285                                                                                                                                                                                                                                                                                                                                                                                                                                                                                                                                                                                                                                                                                                                                                                                                                                                                                                                                                                                                                                                                                                                                                                                                                                                                                                                                                                                                                                                                                                                                                                                                                                                                                                                                   | Department of Pediatrics, Center of Excellence in Clinical Virology, Chulalongkorn                                                                        | Department of Pediatrics, Center of Excellence in Clinical Virology, Chulalongkorn                                                                        | Thongpan,I.                                                                                                                                                                                                                                                                                  |
| EPI_ISL_2582292                                                                                                                                                                                                                                                                                                                                                                                                                                                                                                                                                                                                                                                                                                                                                                                                                                                                                                                                                                                                                                                                                                                                                                                                                                                                                                                                                                                                                                                                                                                                                                                                                                                                                                                                   | Epidemiology and Demography Department, KEMRI-Wellcome Trust Research Programme                                                                           | Epidemiology and Demography Department, KEMRI-Wellcome Trust Research Programme                                                                           | Otieno,J.R., Kamau,E.M., Oketch,J.W., Ngoi,J.M., Agoti,C.N., Gichuki,A.M., Otieno,G.P., Ngama,M., Cane,P.A., Kellam,P., Cotten,M., Lemey,P. and Nokes,D.J.                                                                                                                                   |
| EPI_ISL_2582296                                                                                                                                                                                                                                                                                                                                                                                                                                                                                                                                                                                                                                                                                                                                                                                                                                                                                                                                                                                                                                                                                                                                                                                                                                                                                                                                                                                                                                                                                                                                                                                                                                                                                                                                   | Department of Pediatrics, Center of Excellence in Clinical Virology, Chulalongkorn                                                                        | Department of Pediatrics, Center of Excellence in Clinical Virology, Chulalongkorn                                                                        | Thongpan,I.                                                                                                                                                                                                                                                                                  |
| EPI_ISL_2582298, EPI_ISL_2582299, EPI_ISL_2582302, EPI_ISL_2582303                                                                                                                                                                                                                                                                                                                                                                                                                                                                                                                                                                                                                                                                                                                                                                                                                                                                                                                                                                                                                                                                                                                                                                                                                                                                                                                                                                                                                                                                                                                                                                                                                                                                                | J. Craig Venter Institute                                                                                                                                 | J. Craig Venter Institute                                                                                                                                 | Shabman,R., Fedorova,N., Puri,V., Shrivastava,S., Amedeo,P., Isom,R., Hu,L., Pickett,B., Novotny,M., Durbin,A., Rocchi,I., Williams,T., Hall,C.B., Tesini,B.L., Schnabel,K.C., Walsh,E.E. and Caserta,M.                                                                                     |
| EPI_ISL_2582306, EPI_ISL_2582307, EPI_ISL_2582309, EPI_ISL_2582312, EPI_ISL_2582313, EPI_ISL_2582316, EPI_ISL_2582318, EPI_ISL_2582319, EPI_ISL_2582321, EPI_ISL_2582324, EPI_ISL_2582325, EPI_ISL_2582327, EPI_ISL_2582330, EPI_ISL_2582332, EPI_ISL_2582333, EPI_ISL_2582335, EPI_ISL_2582337, EPI_ISL_2582340, EPI_ISL_2582341, EPI_ISL_2582342, EPI_ISL_2582344, EPI_ISL_2582345, EPI_ISL_2582348, EPI_ISL_2582349, EPI_ISL_2582351, EPI_ISL_2582354, EPI_ISL_2582355, EPI_ISL_2582357, EPI_ISL_2582360, EPI_ISL_2582361, EPI_ISL_2582363, EPI_ISL_2582366, EPI_ISL_2582370, EPI_ISL_2582371, EPI_ISL_2582373, EPI_ISL_2582375, EPI_ISL_2582378, EPI_ISL_2582379, EPI_ISL_2582381, EPI_ISL_2582383, EPI_ISL_2582386, EPI_ISL_2582387, EPI_ISL_2582389, EPI_ISL_2582391, EPI_ISL_2582393, EPI_ISL_2582395, EPI_ISL_2582397, EPI_ISL_2582399, EPI_ISL_2582402, EPI_ISL_2582403, EPI_ISL_2582405, EPI_ISL_2582407, EPI_ISL_2582410, EPI_ISL_2582411, EPI_ISL_2582413, EPI_ISL_2582416, EPI_ISL_2582417, EPI_ISL_2582419, EPI_ISL_2582422, EPI_ISL_2582423, EPI_ISL_2582426, EPI_ISL_2582429, EPI_ISL_2582431, EPI_ISL_2582434, EPI_ISL_2582435, EPI_ISL_2582438, EPI_ISL_2582439, EPI_ISL_2582442, EPI_ISL_2582443, EPI_ISL_2582445, EPI_ISL_2582448, EPI_ISL_2582449, EPI_ISL_2582451, EPI_ISL_2582456, EPI_ISL_2582457, EPI_ISL_2582460, EPI_ISL_2582461, EPI_ISL_2582463, EPI_ISL_2582465, EPI_ISL_2582468, EPI_ISL_2582469, EPI_ISL_2582471, EPI_ISL_2582476, EPI_ISL_2582477, EPI_ISL_2582479, EPI_ISL_2582481, EPI_ISL_2582484, EPI_ISL_2582485, EPI_ISL_2582487, EPI_ISL_2582490, EPI_ISL_2582491, EPI_ISL_2582495, EPI_ISL_2582497, EPI_ISL_2582500, EPI_ISL_2582502, EPI_ISL_2582503, EPI_ISL_2582505, EPI_ISL_2582508, EPI_ISL_2582509 | Broad Institute of MIT & Harvard                                                                                                                          | Broad Institute of MIT & Harvard                                                                                                                          | Newman,R.M., Zody,M.C., DeVincenzo,J.P., Grad,Y., Lipsitch,M., Murphy,R., Fitzgerald,M., Young,S., Gargeya,S., Poon,T.W., Charlebois,P., Weiner,B., Yang,X., Piper,M.E., McCowan,C., Ireland,A., Levin,J., Malboeuf,C., Qu,J., Chapman,S.B., Murphy,C., Wortman,J., Nusbaum,C. and Birren,B. |
| see above                                                                                                                                                                                                                                                                                                                                                                                                                                                                                                                                                                                                                                                                                                                                                                                                                                                                                                                                                                                                                                                                                                                                                                                                                                                                                                                                                                                                                                                                                                                                                                                                                                                                                                                                         | Broad Institute of MIT & Harvard                                                                                                                          | Broad Institute of MIT & Harvard                                                                                                                          | Eden,J.-S., Kok,J., Dwyer,D.E., Fernandez,M., Carter,I. and Holmes,E.C.                                                                                                                                                                                                                      |
| EPI_ISL_2582510, EPI_ISL_2582512                                                                                                                                                                                                                                                                                                                                                                                                                                                                                                                                                                                                                                                                                                                                                                                                                                                                                                                                                                                                                                                                                                                                                                                                                                                                                                                                                                                                                                                                                                                                                                                                                                                                                                                  | Marie Bashir Institute for Infectious Diseases and Biosecurity & Sydney Medical School, The University of Sydney, Westmead Institute for Medical Research | Marie Bashir Institute for Infectious Diseases and Biosecurity & Sydney Medical School, The University of Sydney, Westmead Institute for Medical Research | Eden,J.-S., Kok,J., Dwyer,D.E., Fernandez,M., Carter,I. and Holmes,E.C.                                                                                                                                                                                                                      |
| EPI_ISL_2582513, EPI_ISL_2582515, EPI_ISL_2582517, EPI_ISL_2582519                                                                                                                                                                                                                                                                                                                                                                                                                                                                                                                                                                                                                                                                                                                                                                                                                                                                                                                                                                                                                                                                                                                                                                                                                                                                                                                                                                                                                                                                                                                                                                                                                                                                                | Broad Institute of MIT & Harvard                                                                                                                          | Broad Institute of MIT & Harvard                                                                                                                          | Newman,R.M., Zody,M.C., DeVincenzo,J.P., Grad,Y., Lipsitch,M., Murphy,R., Fitzgerald,M., Young,S., Gargeya,S., Poon,T.W., Charlebois,P., Weiner,B., Yang,X., Piper,M.E., McCowan,C., Ireland,A., Levin,J., Malboeuf,C., Qu,J., Chapman,S.B., Murphy,C., Wortman,J., Nusbaum,C. and Birren,B. |
| EPI_ISL_2582521                                                                                                                                                                                                                                                                                                                                                                                                                                                                                                                                                                                                                                                                                                                                                                                                                                                                                                                                                                                                                                                                                                                                                                                                                                                                                                                                                                                                                                                                                                                                                                                                                                                                                                                                   | J. Craig Venter Institute                                                                                                                                 | J. Craig Venter Institute                                                                                                                                 | Shabman,R., Fedorova,N., Puri,V., Shrivastava,S., Amedeo,P., Isom,R., Hu,L., Pickett,B., Novotny,M., Durbin,A., Rocchi,I., Williams,T., Hall,C.B., Tesini,B.L., Schnabel,K.C., Walsh,E.E. and Caserta,M.                                                                                     |
| EPI_ISL_2582536                                                                                                                                                                                                                                                                                                                                                                                                                                                                                                                                                                                                                                                                                                                                                                                                                                                                                                                                                                                                                                                                                                                                                                                                                                                                                                                                                                                                                                                                                                                                                                                                                                                                                                                                   | Laboratory Medicine, UW Virology                                                                                                                          | Laboratory Medicine, UW Virology                                                                                                                          | Lin,M.J., Tait,A. and Greninger,A.L.                                                                                                                                                                                                                                                         |
| EPI_ISL_2582538, EPI_ISL_2582540, EPI_ISL_2582541                                                                                                                                                                                                                                                                                                                                                                                                                                                                                                                                                                                                                                                                                                                                                                                                                                                                                                                                                                                                                                                                                                                                                                                                                                                                                                                                                                                                                                                                                                                                                                                                                                                                                                 | Lab Medicine, UW                                                                                                                                          | Lab Medicine, UW                                                                                                                                          | Greninger,A.L., Makhosous,N., Kuypers,J.M., Shean,R.C. and Jerome,K.R.                                                                                                                                                                                                                       |
| EPI_ISL_2582543, EPI_ISL_2582545, EPI_ISL_2582547                                                                                                                                                                                                                                                                                                                                                                                                                                                                                                                                                                                                                                                                                                                                                                                                                                                                                                                                                                                                                                                                                                                                                                                                                                                                                                                                                                                                                                                                                                                                                                                                                                                                                                 | J. Craig Venter Institute                                                                                                                                 | J. Craig Venter Institute                                                                                                                                 | Tan,G., Pickett,B., Fedorova,N., Amedeo,P., Isom,R., Hu,L., Christensen,J., Miller,J., Novotny,M., Durbin,A., Rocchi,I., Williams,T., Arumemi,F. and Das,S.                                                                                                                                  |
| EPI_ISL_2582551                                                                                                                                                                                                                                                                                                                                                                                                                                                                                                                                                                                                                                                                                                                                                                                                                                                                                                                                                                                                                                                                                                                                                                                                                                                                                                                                                                                                                                                                                                                                                                                                                                                                                                                                   | Lab Medicine, UW                                                                                                                                          | Lab Medicine, UW                                                                                                                                          | Greninger,A.L., Makhosous,N., Kuypers,J.M., Shean,R.C. and Jerome,K.R.                                                                                                                                                                                                                       |
| EPI_ISL_2582553                                                                                                                                                                                                                                                                                                                                                                                                                                                                                                                                                                                                                                                                                                                                                                                                                                                                                                                                                                                                                                                                                                                                                                                                                                                                                                                                                                                                                                                                                                                                                                                                                                                                                                                                   | J. Craig Venter Institute                                                                                                                                 | J. Craig Venter Institute                                                                                                                                 | Tan,G., Pickett,B., Fedorova,N., Amedeo,P., Isom,R., Hu,L., Christensen,J., Miller,J., Novotny,M., Durbin,A., Rocchi,I., Williams,T., Arumemi,F. and Das,S.                                                                                                                                  |
| EPI_ISL_2582561                                                                                                                                                                                                                                                                                                                                                                                                                                                                                                                                                                                                                                                                                                                                                                                                                                                                                                                                                                                                                                                                                                                                                                                                                                                                                                                                                                                                                                                                                                                                                                                                                                                                                                                                   | Central Laboratory, Guangzhou Women and Children's Medical Center                                                                                         | Central Laboratory, Guangzhou Women and Children's Medical Center                                                                                         | Xie,J.H., Zhu,B., Zhong,J.Y., Chen,Y. and Zhang,Y.Y.                                                                                                                                                                                                                                         |
| EPI_ISL_2582563                                                                                                                                                                                                                                                                                                                                                                                                                                                                                                                                                                                                                                                                                                                                                                                                                                                                                                                                                                                                                                                                                                                                                                                                                                                                                                                                                                                                                                                                                                                                                                                                                                                                                                                                   | The Second Department, Lanzhou Institute of Biological Products Co                                                                                        | The Second Department, Lanzhou Institute of Biological Products Co                                                                                        | Zhu,C., Fu,S., Yu,L. and Zhou,X.                                                                                                                                                                                                                                                             |
| EPI_ISL_2582565, EPI_ISL_2582567                                                                                                                                                                                                                                                                                                                                                                                                                                                                                                                                                                                                                                                                                                                                                                                                                                                                                                                                                                                                                                                                                                                                                                                                                                                                                                                                                                                                                                                                                                                                                                                                                                                                                                                  | Epidemiology and Demography Department, KEMRI-Wellcome Trust Research Programme                                                                           | Epidemiology and Demography Department, KEMRI-Wellcome Trust Research Programme                                                                           | Otieno,J.R., Kamau,E.M., Oketch,J.W., Ngoi,J.M., Agoti,C.N., Gichuki,A.M., Otieno,G.P., Ngama,M., Cane,P.A., Kellam,P., Cotten,M., Lemey,P. and Nokes,D.J.                                                                                                                                   |
| EPI_ISL_2582569, EPI_ISL_2582571                                                                                                                                                                                                                                                                                                                                                                                                                                                                                                                                                                                                                                                                                                                                                                                                                                                                                                                                                                                                                                                                                                                                                                                                                                                                                                                                                                                                                                                                                                                                                                                                                                                                                                                  | J. Craig Venter Institute                                                                                                                                 | J. Craig Venter Institute                                                                                                                                 | Tan,G., Pickett,B., Fedorova,N., Amedeo,P., Isom,R., Hu,L., Christensen,J., Miller,J., Novotny,M., Durbin,A., Rocchi,I., Williams,T., Arumemi,F. and Das,S.                                                                                                                                  |
| EPI_ISL_2582573                                                                                                                                                                                                                                                                                                                                                                                                                                                                                                                                                                                                                                                                                                                                                                                                                                                                                                                                                                                                                                                                                                                                                                                                                                                                                                                                                                                                                                                                                                                                                                                                                                                                                                                                   | Pediatrics - Infectious Diseases, Medical College of Wisconsin                                                                                            | Pediatrics - Infectious Diseases, Medical College of Wisconsin                                                                                            | Rebuffo-Scheer,C., Bose,M.E., He,J., Khajaa,S., Ulatowski,M., Beck,E.T., Fan,J., Kumar,S., Nelson,M.I. and Henrickson,K.J.                                                                                                                                                                   |
| EPI_ISL_2582577, EPI_ISL_2582579, EPI_ISL_2582581, EPI_ISL_2582583, EPI_ISL_2582585, EPI_ISL_2582587, EPI_ISL_2582588, EPI_ISL_2582590, EPI_ISL_2582592, EPI_ISL_2582594, EPI_ISL_2582596, EPI_ISL_2582598, EPI_ISL_2582600, EPI_ISL_2582601, EPI_ISL_2582603, EPI_ISL_2582605, EPI_ISL_2582607, EPI_ISL_2582609, EPI_ISL_2582610, EPI_ISL_2582614, EPI_ISL_2582616, EPI_ISL_2582618                                                                                                                                                                                                                                                                                                                                                                                                                                                                                                                                                                                                                                                                                                                                                                                                                                                                                                                                                                                                                                                                                                                                                                                                                                                                                                                                                              | Broad Institute of MIT & Harvard                                                                                                                          | Broad Institute of MIT & Harvard                                                                                                                          | Newman,R.M., Zody,M.C., DeVincenzo,J.P., Grad,Y., Lipsitch,M., Murphy,R., Fitzgerald,M., Young,S., Gargeya,S., Poon,T.W., Charlebois,P., Weiner,B., Yang,X., Piper,M.E., McCowan,C., Ireland,A., Levin,J., Malboeuf,C., Qu,J., Chapman,S.B., Murphy,C., Wortman,J., Nusbaum,C. and Birren,B. |
| see above                                                                                                                                                                                                                                                                                                                                                                                                                                                                                                                                                                                                                                                                                                                                                                                                                                                                                                                                                                                                                                                                                                                                                                                                                                                                                                                                                                                                                                                                                                                                                                                                                                                                                                                                         | Broad Institute of MIT & Harvard                                                                                                                          | Broad Institute of MIT & Harvard                                                                                                                          | Gu,H.J., Sun,S.J., Chen,R. and Yang,P.H.                                                                                                                                                                                                                                                     |
| EPI_ISL_2582621                                                                                                                                                                                                                                                                                                                                                                                                                                                                                                                                                                                                                                                                                                                                                                                                                                                                                                                                                                                                                                                                                                                                                                                                                                                                                                                                                                                                                                                                                                                                                                                                                                                                                                                                   | Academy of Military Medical Sciences, Institute of Microbiology and Epidemiology                                                                          | Academy of Military Medical Sciences, Institute of Microbiology and Epidemiology                                                                          |                                                                                                                                                                                                                                                                                              |
| EPI_ISL_2582623, EPI_ISL_2582625                                                                                                                                                                                                                                                                                                                                                                                                                                                                                                                                                                                                                                                                                                                                                                                                                                                                                                                                                                                                                                                                                                                                                                                                                                                                                                                                                                                                                                                                                                                                                                                                                                                                                                                  | Broad Institute of MIT & Harvard                                                                                                                          | Broad Institute of MIT & Harvard                                                                                                                          | Newman,R.M., Zody,M.C., DeVincenzo,J.P., Grad,Y., Lipsitch,M., Murphy,R., Fitzgerald,M., Young,S., Gargeya,S., Poon,T.W., Charlebois,P., Weiner,B.,                                                                                                                                          |

|                                                                                                                                                                                                                                                                                                                                                                                                                        |                                                                                                                                                           |                                                                                                                                                           |                                                                                                                                                                                                                                                                                              |
|------------------------------------------------------------------------------------------------------------------------------------------------------------------------------------------------------------------------------------------------------------------------------------------------------------------------------------------------------------------------------------------------------------------------|-----------------------------------------------------------------------------------------------------------------------------------------------------------|-----------------------------------------------------------------------------------------------------------------------------------------------------------|----------------------------------------------------------------------------------------------------------------------------------------------------------------------------------------------------------------------------------------------------------------------------------------------|
| EPI_ISL_2582630                                                                                                                                                                                                                                                                                                                                                                                                        | Pediatrics - Infectious Diseases, Medical College of Wisconsin                                                                                            | Pediatrics - Infectious Diseases, Medical College of Wisconsin                                                                                            | Yang,X., Piper,M.E., McCowan,C., Ireland,A., Levin,J., Malboeuf,C., Qu,J., Chapman,S.B., Murphy,C., Wortman,J., Nusbaum,C. and Birren,B.                                                                                                                                                     |
| EPI_ISL_2582631, EPI_ISL_2582633                                                                                                                                                                                                                                                                                                                                                                                       | J. Craig Venter Institute                                                                                                                                 | J. Craig Venter Institute                                                                                                                                 | Rebuffo-Scheer,C., Bose,M.E., He,J., Khajaja,S., Ulatowski,M., Beck,E.T., Fan,J., Kumar,S., Nelson,M.I. and Henrickson,K.J.                                                                                                                                                                  |
| EPI_ISL_2582635                                                                                                                                                                                                                                                                                                                                                                                                        | Broad Institute of MIT & Harvard                                                                                                                          | Broad Institute of MIT & Harvard                                                                                                                          | Shabman,R., Fedorova,N., Puri,V., Shrivastava,S., Amedeo,P., Isom,R., Hu,L., Pickett,B., Novotny,M., Durbin,A., Rocchi,I., Williams,T., Hall,C.B., Tesini,B.L., Schnabel,K.C., Walsh,E.E. and Caserta,M.                                                                                     |
| EPI_ISL_2582641, EPI_ISL_2582644, EPI_ISL_2582646                                                                                                                                                                                                                                                                                                                                                                      | Marie Bashir Institute for Infectious Diseases and Biosecurity & Sydney Medical School, The University of Sydney, Westmead Institute for Medical Research | Marie Bashir Institute for Infectious Diseases and Biosecurity & Sydney Medical School, The University of Sydney, Westmead Institute for Medical Research | Newman,R.M., Zody,M.C., DeVincenzo,J.P., Grad,Y., Lipsitch,M., Murphy,R., Fitzgerald,M., Young,S., Gargeya,S., Poon,T.W., Charlebois,P., Weiner,B., Yang,X., Piper,M.E., McCowan,C., Ireland,A., Levin,J., Malboeuf,C., Qu,J., Chapman,S.B., Murphy,C., Wortman,J., Nusbaum,C. and Birren,B. |
| EPI_ISL_2582648, EPI_ISL_2582650, EPI_ISL_2582653                                                                                                                                                                                                                                                                                                                                                                      | Pediatrics, University of New Mexico                                                                                                                      | Pediatrics, University of New Mexico                                                                                                                      | Eden,J.-S., Kok,J., Dwyer,D.E., Fernandez,M., Carter,I. and Holmes,E.C.                                                                                                                                                                                                                      |
| EPI_ISL_2582669, EPI_ISL_2582670, EPI_ISL_2582673                                                                                                                                                                                                                                                                                                                                                                      | Epidemiology and Demography Department, KEMRI-Wellcome Trust Research Programme                                                                           | Epidemiology and Demography Department, KEMRI-Wellcome Trust Research Programme                                                                           | Otieno,J.R., Kamau,E.M., Oketch,J.W., Ngoi,J.M., Agoti,C.N., Gichuki,A.M., Otieno,G.P., Ngama,M., Cane,P.A., Kellam,P., Cotten,M., Lemey,P. and Nokes,D.J.                                                                                                                                   |
| EPI_ISL_2582675                                                                                                                                                                                                                                                                                                                                                                                                        | Suguru Takeuchi Nagoya University Graduate School of Medicine, Department of Pediatrics                                                                   | Suguru Takeuchi Nagoya University Graduate School of Medicine, Department of Pediatrics                                                                   | Takeuchi,S., Kawada,J. and Ito,Y.                                                                                                                                                                                                                                                            |
| EPI_ISL_2582678                                                                                                                                                                                                                                                                                                                                                                                                        | Epidemiology and Demography Department, KEMRI-Wellcome Trust Research Programme                                                                           | Epidemiology and Demography Department, KEMRI-Wellcome Trust Research Programme                                                                           | Otieno,J.R., Kamau,E.M., Oketch,J.W., Ngoi,J.M., Agoti,C.N., Gichuki,A.M., Otieno,G.P., Ngama,M., Cane,P.A., Kellam,P., Cotten,M., Lemey,P. and Nokes,D.J.                                                                                                                                   |
| EPI_ISL_2582681                                                                                                                                                                                                                                                                                                                                                                                                        | Experimental Pathology, Immunology, and Microbiology, American University of Beirut                                                                       | Experimental Pathology, Immunology, and Microbiology, American University of Beirut                                                                       | Ezzeddine,A.M.                                                                                                                                                                                                                                                                               |
| EPI_ISL_2582683, EPI_ISL_2582686, EPI_ISL_2582688, EPI_ISL_2582691, EPI_ISL_2582694, EPI_ISL_2582696, EPI_ISL_2582699, EPI_ISL_2582701                                                                                                                                                                                                                                                                                 | Broad Institute of MIT & Harvard                                                                                                                          | Broad Institute of MIT & Harvard                                                                                                                          | Newman,R.M., Zody,M.C., DeVincenzo,J.P., Grad,Y., Lipsitch,M., Murphy,R., Fitzgerald,M., Young,S., Gargeya,S., Poon,T.W., Charlebois,P., Weiner,B., Yang,X., Piper,M.E., McCowan,C., Ireland,A., Levin,J., Malboeuf,C., Qu,J., Chapman,S.B., Murphy,C., Wortman,J., Nusbaum,C. and Birren,B. |
| EPI_ISL_2582703                                                                                                                                                                                                                                                                                                                                                                                                        | J. Craig Venter Institute                                                                                                                                 | J. Craig Venter Institute                                                                                                                                 | Shabman,R., Fedorova,N., Puri,V., Shrivastava,S., Amedeo,P., Isom,R., Hu,L., Pickett,B., Novotny,M., Durbin,A., Rocchi,I., Williams,T., Hall,C.B., Tesini,B.L., Schnabel,K.C., Walsh,E.E. and Caserta,M.                                                                                     |
| EPI_ISL_2582706, EPI_ISL_2582709, EPI_ISL_2582711, EPI_ISL_2582714, EPI_ISL_2582716, EPI_ISL_2582719, EPI_ISL_2582722, EPI_ISL_2582724, EPI_ISL_2582727, EPI_ISL_2582729, EPI_ISL_2582732, EPI_ISL_2582735, EPI_ISL_2582738, EPI_ISL_2582740, EPI_ISL_2582743, EPI_ISL_2582745, EPI_ISL_2582747, EPI_ISL_2582750, EPI_ISL_2582751, EPI_ISL_2582756, EPI_ISL_2582758, EPI_ISL_2582760, EPI_ISL_2582762, EPI_ISL_2582764 | Broad Institute of MIT & Harvard                                                                                                                          | Broad Institute of MIT & Harvard                                                                                                                          | Newman,R.M., Zody,M.C., DeVincenzo,J.P., Grad,Y., Lipsitch,M., Murphy,R., Fitzgerald,M., Young,S., Gargeya,S., Poon,T.W., Charlebois,P., Weiner,B., Yang,X., Piper,M.E., McCowan,C., Ireland,A., Levin,J., Malboeuf,C., Qu,J., Chapman,S.B., Murphy,C., Wortman,J., Nusbaum,C. and Birren,B. |
| see above                                                                                                                                                                                                                                                                                                                                                                                                              | Broad Institute of MIT & Harvard                                                                                                                          | Broad Institute of MIT & Harvard                                                                                                                          | Newman,R.M., Zody,M.C., DeVincenzo,J.P., Grad,Y., Lipsitch,M., Murphy,R., Fitzgerald,M., Young,S., Gargeya,S., Poon,T.W., Charlebois,P., Weiner,B., Yang,X., Piper,M.E., McCowan,C., Ireland,A., Levin,J., Malboeuf,C., Qu,J., Chapman,S.B., Murphy,C., Wortman,J., Nusbaum,C. and Birren,B. |
| EPI_ISL_2582766                                                                                                                                                                                                                                                                                                                                                                                                        | Infectious Disease Initiative, Broad Institute                                                                                                            | Infectious Disease Initiative, Broad Institute                                                                                                            | Newman,R.M., Zody,M.C., DeVincenzo,J.P., Grad,Y., Lipsitch,M., Murphy,R., Fitzgerald,M., Young,S., Gargeya,S., Poon,T.W., Charlebois,P., Weiner,B., Yang,X., Piper,M.E., McCowan,C., Ireland,A., Levin,J., Malboeuf,C., Qu,J., Chapman,S.B., Murphy,C., Wortman,J., Nusbaum,C. and Birren,B. |
| EPI_ISL_2582768                                                                                                                                                                                                                                                                                                                                                                                                        | Broad Institute of MIT & Harvard                                                                                                                          | Broad Institute of MIT & Harvard                                                                                                                          | Newman,R.M., Zody,M.C., DeVincenzo,J.P., Grad,Y., Lipsitch,M., Murphy,R., Fitzgerald,M., Young,S., Gargeya,S., Poon,T.W., Charlebois,P., Weiner,B., Yang,X., Piper,M.E., McCowan,C., Ireland,A., Levin,J., Malboeuf,C., Qu,J., Chapman,S.B., Murphy,C., Wortman,J., Nusbaum,C. and Birren,B. |
| EPI_ISL_2582771                                                                                                                                                                                                                                                                                                                                                                                                        | Marie Bashir Institute for Infectious Diseases and Biosecurity & Sydney Medical School, The University of Sydney, Westmead Institute for Medical Research | Marie Bashir Institute for Infectious Diseases and Biosecurity & Sydney Medical School, The University of Sydney, Westmead Institute for Medical Research | Eden,J.-S., Kok,J., Dwyer,D.E., Fernandez,M., Carter,I. and Holmes,E.C.                                                                                                                                                                                                                      |
| EPI_ISL_2582775, EPI_ISL_2582778                                                                                                                                                                                                                                                                                                                                                                                       | J. Craig Venter Institute                                                                                                                                 | J. Craig Venter Institute                                                                                                                                 | Shabman,R., Fedorova,N., Puri,V., Shrivastava,S., Amedeo,P., Isom,R., Hu,L., Pickett,B., Novotny,M., Durbin,A., Rocchi,I., Williams,T., Hall,C.B., Tesini,B.L., Schnabel,K.C., Walsh,E.E. and Caserta,M.                                                                                     |
| EPI_ISL_2582780                                                                                                                                                                                                                                                                                                                                                                                                        | Broad Institute of MIT & Harvard                                                                                                                          | Broad Institute of MIT & Harvard                                                                                                                          | Newman,R.M., Zody,M.C., DeVincenzo,J.P., Grad,Y., Lipsitch,M., Murphy,R., Fitzgerald,M., Young,S., Gargeya,S., Poon,T.W., Charlebois,P., Weiner,B., Yang,X., Piper,M.E., McCowan,C., Ireland,A., Levin,J., Malboeuf,C., Qu,J., Chapman,S.B., Murphy,C., Wortman,J., Nusbaum,C. and Birren,B. |
| EPI_ISL_2582782                                                                                                                                                                                                                                                                                                                                                                                                        | J. Craig Venter Institute                                                                                                                                 | J. Craig Venter Institute                                                                                                                                 | Shabman,R., Fedorova,N., Puri,V., Shrivastava,S., Amedeo,P., Isom,R., Hu,L., Pickett,B., Novotny,M., Durbin,A., Rocchi,I., Williams,T., Hall,C.B., Tesini,B.L., Schnabel,K.C., Walsh,E.E. and Caserta,M.                                                                                     |
| EPI_ISL_2582784                                                                                                                                                                                                                                                                                                                                                                                                        | Broad Institute of MIT & Harvard                                                                                                                          | Broad Institute of MIT & Harvard                                                                                                                          | Newman,R.M., Zody,M.C., DeVincenzo,J.P., Grad,Y., Lipsitch,M., Murphy,R., Fitzgerald,M., Young,S., Gargeya,S., Poon,T.W., Charlebois,P., Weiner,B., Yang,X., Piper,M.E., McCowan,C., Ireland,A., Levin,J., Malboeuf,C., Qu,J., Chapman,S.B., Murphy,C., Wortman,J., Nusbaum,C. and Birren,B. |
| EPI_ISL_2582787                                                                                                                                                                                                                                                                                                                                                                                                        | Lab Medicine, UW                                                                                                                                          | Lab Medicine, UW                                                                                                                                          | Greninger,A.L., Makhosun,N., Kuypers,J.M., Shean,R.C. and Jerome,K.R.                                                                                                                                                                                                                        |
| EPI_ISL_2582789                                                                                                                                                                                                                                                                                                                                                                                                        | Epidemiology and Demography Department, KEMRI-Wellcome Trust Research Programme                                                                           | Epidemiology and Demography Department, KEMRI-Wellcome Trust Research Programme                                                                           | Otieno,J.R., Kamau,E.M., Oketch,J.W., Ngoi,J.M., Agoti,C.N., Gichuki,A.M., Otieno,G.P., Ngama,M., Cane,P.A., Kellam,P., Cotten,M., Lemey,P. and Nokes,D.J.                                                                                                                                   |
| EPI_ISL_2582796                                                                                                                                                                                                                                                                                                                                                                                                        | Central Laboratory, Guangzhou Women and Children's Medical Center                                                                                         | Central Laboratory, Guangzhou Women and Children's Medical Center                                                                                         | Xie,J.H., Zhu,B., Zhong,J.Y., Chen,Y. and Zhang,Y.Y.                                                                                                                                                                                                                                         |
| EPI_ISL_2582798                                                                                                                                                                                                                                                                                                                                                                                                        | Lab Medicine, UW                                                                                                                                          | Lab Medicine, UW                                                                                                                                          | Greninger,A.L., Makhosun,N., Kuypers,J.M., Shean,R.C. and Jerome,K.R.                                                                                                                                                                                                                        |
| EPI_ISL_2582801                                                                                                                                                                                                                                                                                                                                                                                                        | Department of Laboratory Medicine, Lin-Kou Chang-Gung Memorial Hospital                                                                                   | Department of Laboratory Medicine, Lin-Kou Chang-Gung Memorial Hospital                                                                                   | Tsao,K.-C., Gong,Y.-N., Yang,S.-L., Chen,G.-W., Chen,Y.-W., Huang,Y.-C. and Liu,Y.-C.                                                                                                                                                                                                        |
| EPI_ISL_2582804                                                                                                                                                                                                                                                                                                                                                                                                        | Epidemiology and Demography Department, KEMRI-Wellcome Trust Research Programme                                                                           | Epidemiology and Demography Department, KEMRI-Wellcome Trust Research Programme                                                                           | Otieno,J.R., Kamau,E.M., Oketch,J.W., Ngoi,J.M., Agoti,C.N., Gichuki,A.M., Otieno,G.P., Ngama,M., Cane,P.A., Kellam,P., Cotten,M., Lemey,P. and Nokes,D.J.                                                                                                                                   |
| EPI_ISL_2582805                                                                                                                                                                                                                                                                                                                                                                                                        | J. Craig Venter Institute                                                                                                                                 | J. Craig Venter Institute                                                                                                                                 | Tan,G., Pickett,B., Fedorova,N., Amedeo,P., Isom,R., Hu,L., Christensen,J., Miller,J., Novotny,M., Durbin,A., Rocchi,I., Williams,T., Arumemi,F. and Das,S.                                                                                                                                  |
| EPI_ISL_2582808, EPI_ISL_2582810, EPI_ISL_2582813, EPI_ISL_2582819, EPI_ISL_2582820, EPI_ISL_2582823, EPI_ISL_2582826                                                                                                                                                                                                                                                                                                  | Broad Institute of MIT & Harvard                                                                                                                          | Broad Institute of MIT & Harvard                                                                                                                          | Newman,R.M., Zody,M.C., DeVincenzo,J.P., Grad,Y., Lipsitch,M., Murphy,R., Fitzgerald,M., Young,S., Gargeya,S., Poon,T.W., Charlebois,P., Weiner,B., Yang,X., Piper,M.E., McCowan,C., Ireland,A., Levin,J., Malboeuf,C., Qu,J., Chapman,S.B., Murphy,C., Wortman,J., Nusbaum,C. and Birren,B. |
| EPI_ISL_2582832, EPI_ISL_2582834                                                                                                                                                                                                                                                                                                                                                                                       | Laboratory Medicine, UW Virology                                                                                                                          | Laboratory Medicine, UW Virology                                                                                                                          | Lin,M.J., Tait,A. and Greninger,A.L.                                                                                                                                                                                                                                                         |
| EPI_ISL_2582836, EPI_ISL_2582838                                                                                                                                                                                                                                                                                                                                                                                       | Department of Experimental Modeling and Pathogenesis of Infectious Diseases, Federal Research Center of Fundamental and Translational Medicine            | Department of Experimental Modeling and Pathogenesis of Infectious Diseases, Federal Research Center of Fundamental and Translational Medicine            | Dubovitskiy,N.A., Sobolev,I.A., Kurskaya,O.G., Sharshov,K.A., Anoshina,A.V., Leonova,N.V., Murashkina,T.A., Solomatina,M.V., Derko,A.A., Saroyan,T.A., Kabilov,M.R., Alikina,T.Y. and Shestopalov,A.M.                                                                                       |
| EPI_ISL_2582841                                                                                                                                                                                                                                                                                                                                                                                                        | Marie Bashir Institute for Infectious Diseases and Biosecurity & Sydney Medical School, The University of Sydney, Westmead Institute for Medical Research | Marie Bashir Institute for Infectious Diseases and Biosecurity & Sydney Medical School, The University of Sydney, Westmead Institute for Medical Research | Eden,J.-S., Kok,J., Dwyer,D.E., Fernandez,M., Carter,I. and Holmes,E.C.                                                                                                                                                                                                                      |
| EPI_ISL_2582844                                                                                                                                                                                                                                                                                                                                                                                                        | Broad Institute of MIT & Harvard                                                                                                                          | Broad Institute of MIT & Harvard                                                                                                                          | Newman,R.M., Zody,M.C., DeVincenzo,J.P., Grad,Y., Lipsitch,M., Murphy,R., Fitzgerald,M., Young,S., Gargeya,S., Poon,T.W., Charlebois,P., Weiner,B., Yang,X., Piper,M.E., McCowan,C., Ireland,A., Levin,J., Malboeuf,C., Qu,J., Chapman,S.B., Murphy,C., Wortman,J., Nusbaum,C. and Birren,B. |
| EPI_ISL_2582847                                                                                                                                                                                                                                                                                                                                                                                                        | J. Craig Venter Institute                                                                                                                                 | J. Craig Venter Institute                                                                                                                                 | Shabman,R., Fedorova,N., Puri,V., Shrivastava,S., Amedeo,P., Isom,R., Hu,L., Pickett,B., Novotny,M., Durbin,A., Rocchi,I., Williams,T., Hall,C.B., Tesini,B.L., Schnabel,K.C., Walsh,E.E. and Caserta,M.                                                                                     |
| EPI_ISL_2582849, EPI_ISL_2582851                                                                                                                                                                                                                                                                                                                                                                                       | Center for Infectious Diseases, School of Public Health,                                                                                                  | Center for Infectious Diseases, School of Public Health,                                                                                                  | Bahl,J., Hixson,J., Kim,D.-K., Qiu,X., Piedra,P.A., Piedra,F.-A., Avadhanula,V. and Machado,A.A.                                                                                                                                                                                             |

|                                                                                                                                        |                                                                                          |                                                                                          |                                                                                                                                                                                                                                                                                              |
|----------------------------------------------------------------------------------------------------------------------------------------|------------------------------------------------------------------------------------------|------------------------------------------------------------------------------------------|----------------------------------------------------------------------------------------------------------------------------------------------------------------------------------------------------------------------------------------------------------------------------------------------|
| EPI_ISL_2582854                                                                                                                        | University of Texas Health Science Center<br>Broad Institute of MIT & Harvard            | University of Texas Health Science Center<br>Broad Institute of MIT & Harvard            | Newman,R.M., Zody,M.C., DeVincenzo,J.P., Grad,Y., Lipsitch,M., Murphy,R., Fitzgerald,M., Young,S., Gargeya,S., Poon,T.W., Charlebois,P., Weiner,B., Yang,X., Piper,M.E., McCowan,C., Ireland,A., Levin,J., Malboeuf,C., Qu,J., Chapman,S.B., Murphy,C., Wortman,J., Nusbaum,C. and Birren,B. |
| EPI_ISL_2582857, EPI_ISL_2582859, EPI_ISL_2582861                                                                                      | Pediatrics - Infectious Diseases, Medical College of Wisconsin                           | Pediatrics - Infectious Diseases, Medical College of Wisconsin                           | Rebuffo-Scheer,C., Bose,M.E., He,J., Khajaja,S., Ulatowski,M., Beck,E.T., Fan,J., Kumar,S., Nelson,M.I. and Henrickson,K.J.                                                                                                                                                                  |
| EPI_ISL_2582864                                                                                                                        | Gansu Center for Disease Control and Prevention, Pathogen Laboratory                     | Gansu Center for Disease Control and Prevention, Pathogen Laboratory                     | Qiao,R., Chen,J., Wu,H. and Yu,D.                                                                                                                                                                                                                                                            |
| EPI_ISL_2582866                                                                                                                        | Epidemiology and Demography Department, KEMRI-Wellcome Trust Research Programme          | Epidemiology and Demography Department, KEMRI-Wellcome Trust Research Programme          | Otieno,J.R., Kamau,E.M., Oketch,J.W., Ngoi,J.M., Agoti,C.N., Gichuki,A.M., Otieno,G.P., Ngama,M., Cane,P.A., Kellam,P., Cotten,M., Lemey,P. and Nokes,D.J.                                                                                                                                   |
| EPI_ISL_2582869                                                                                                                        | Pediatrics - Infectious Diseases, Medical College of Wisconsin                           | Pediatrics - Infectious Diseases, Medical College of Wisconsin                           | Rebuffo-Scheer,C., Bose,M.E., He,J., Khajaja,S., Ulatowski,M., Beck,E.T., Fan,J., Kumar,S., Nelson,M.I. and Henrickson,K.J.                                                                                                                                                                  |
| EPI_ISL_2582873, EPI_ISL_2582875                                                                                                       | J. Craig Venter Institute                                                                | J. Craig Venter Institute                                                                | Shabman,R., Fedorova,N., Puri,V., Shrivastava,S., Amedeo,P., Isom,R., Hu,L., Pickett,B., Novotny,M., Durbin,A., Rocchi,I., Williams,T., Hall,C.B., Tesini,B.L., Schnabel,K.C., Walsh,E.E. and Caserta,M.                                                                                     |
| EPI_ISL_2582878                                                                                                                        | Broad Institute of MIT & Harvard                                                         | Broad Institute of MIT & Harvard                                                         | Newman,R.M., Zody,M.C., DeVincenzo,J.P., Grad,Y., Lipsitch,M., Murphy,R., Fitzgerald,M., Young,S., Gargeya,S., Poon,T.W., Charlebois,P., Weiner,B., Yang,X., Piper,M.E., McCowan,C., Ireland,A., Levin,J., Malboeuf,C., Qu,J., Chapman,S.B., Murphy,C., Wortman,J., Nusbaum,C. and Birren,B. |
| EPI_ISL_2582880                                                                                                                        | Medicine, University of Washington, 300 9th Ave, Harborview Research & Training Building | Medicine, University of Washington, 300 9th Ave, Harborview Research & Training Building | Chu,H., Scott,E. and Roychoudhury,P.                                                                                                                                                                                                                                                         |
| EPI_ISL_2582883                                                                                                                        | Broad Institute of MIT & Harvard                                                         | Broad Institute of MIT & Harvard                                                         | Newman,R.M., Zody,M.C., DeVincenzo,J.P., Grad,Y., Lipsitch,M., Murphy,R., Fitzgerald,M., Young,S., Gargeya,S., Poon,T.W., Charlebois,P., Weiner,B., Yang,X., Piper,M.E., McCowan,C., Ireland,A., Levin,J., Malboeuf,C., Qu,J., Chapman,S.B., Murphy,C., Wortman,J., Nusbaum,C. and Birren,B. |
| EPI_ISL_2582886                                                                                                                        | J. Craig Venter Institute                                                                | J. Craig Venter Institute                                                                | Shabman,R., Fedorova,N., Puri,V., Shrivastava,S., Amedeo,P., Isom,R., Hu,L., Pickett,B., Novotny,M., Durbin,A., Rocchi,I., Williams,T., Hall,C.B., Tesini,B.L., Schnabel,K.C., Walsh,E.E. and Caserta,M.                                                                                     |
| EPI_ISL_2582892, EPI_ISL_2582893                                                                                                       | Pediatrics - Infectious Diseases, Medical College of Wisconsin                           | Pediatrics - Infectious Diseases, Medical College of Wisconsin                           | Rebuffo-Scheer,C., Bose,M.E., He,J., Khajaja,S., Ulatowski,M., Beck,E.T., Fan,J., Kumar,S., Nelson,M.I. and Henrickson,K.J.                                                                                                                                                                  |
| EPI_ISL_2582901                                                                                                                        | J. Craig Venter Institute                                                                | J. Craig Venter Institute                                                                | Shabman,R., Fedorova,N., Puri,V., Shrivastava,S., Amedeo,P., Isom,R., Hu,L., Pickett,B., Novotny,M., Durbin,A., Rocchi,I., Williams,T., Hall,C.B., Tesini,B.L., Schnabel,K.C., Walsh,E.E. and Caserta,M.                                                                                     |
| EPI_ISL_2582904                                                                                                                        | Broad Institute of MIT & Harvard                                                         | Broad Institute of MIT & Harvard                                                         | Newman,R.M., Zody,M.C., DeVincenzo,J.P., Grad,Y., Lipsitch,M., Murphy,R., Fitzgerald,M., Young,S., Gargeya,S., Poon,T.W., Charlebois,P., Weiner,B., Yang,X., Piper,M.E., McCowan,C., Ireland,A., Levin,J., Malboeuf,C., Qu,J., Chapman,S.B., Murphy,C., Wortman,J., Nusbaum,C. and Birren,B. |
| EPI_ISL_2582906                                                                                                                        | Department of Pediatrics, Center of Excellence in Clinical Virology, Chulalongkorn       | Department of Pediatrics, Center of Excellence in Clinical Virology, Chulalongkorn       | Thongpan,I.                                                                                                                                                                                                                                                                                  |
| EPI_ISL_2582908, EPI_ISL_2582910                                                                                                       | Epidemiology and Demography Department, KEMRI-Wellcome Trust Research Programme          | Epidemiology and Demography Department, KEMRI-Wellcome Trust Research Programme          | Otieno,J.R., Kamau,E.M., Oketch,J.W., Ngoi,J.M., Agoti,C.N., Gichuki,A.M., Otieno,G.P., Ngama,M., Cane,P.A., Kellam,P., Cotten,M., Lemey,P. and Nokes,D.J.                                                                                                                                   |
| EPI_ISL_2582923, EPI_ISL_2582926, EPI_ISL_2582927, EPI_ISL_2582930, EPI_ISL_2582933                                                    | J. Craig Venter Institute                                                                | J. Craig Venter Institute                                                                | Shabman,R., Fedorova,N., Puri,V., Shrivastava,S., Amedeo,P., Isom,R., Hu,L., Pickett,B., Novotny,M., Durbin,A., Rocchi,I., Williams,T., Hall,C.B., Tesini,B.L., Schnabel,K.C., Walsh,E.E. and Caserta,M.                                                                                     |
| EPI_ISL_2582935, EPI_ISL_2582938, EPI_ISL_2582941                                                                                      | Broad Institute of MIT & Harvard                                                         | Broad Institute of MIT & Harvard                                                         | Newman,R.M., Zody,M.C., DeVincenzo,J.P., Grad,Y., Lipsitch,M., Murphy,R., Fitzgerald,M., Young,S., Gargeya,S., Poon,T.W., Charlebois,P., Weiner,B., Yang,X., Piper,M.E., McCowan,C., Ireland,A., Levin,J., Malboeuf,C., Qu,J., Chapman,S.B., Murphy,C., Wortman,J., Nusbaum,C. and Birren,B. |
| EPI_ISL_2582946, EPI_ISL_2582949                                                                                                       | J. Craig Venter Institute                                                                | J. Craig Venter Institute                                                                | Shabman,R., Fedorova,N., Puri,V., Shrivastava,S., Amedeo,P., Isom,R., Hu,L., Pickett,B., Novotny,M., Durbin,A., Rocchi,I., Williams,T., Hall,C.B., Tesini,B.L., Schnabel,K.C., Walsh,E.E. and Caserta,M.                                                                                     |
| EPI_ISL_2582951                                                                                                                        | Broad Institute of MIT & Harvard                                                         | Broad Institute of MIT & Harvard                                                         | Newman,R.M., Zody,M.C., DeVincenzo,J.P., Grad,Y., Lipsitch,M., Murphy,R., Fitzgerald,M., Young,S., Gargeya,S., Poon,T.W., Charlebois,P., Weiner,B., Yang,X., Piper,M.E., McCowan,C., Ireland,A., Levin,J., Malboeuf,C., Qu,J., Chapman,S.B., Murphy,C., Wortman,J., Nusbaum,C. and Birren,B. |
| EPI_ISL_2582954                                                                                                                        | J. Craig Venter Institute                                                                | J. Craig Venter Institute                                                                | Shabman,R., Fedorova,N., Puri,V., Shrivastava,S., Amedeo,P., Isom,R., Hu,L., Pickett,B., Novotny,M., Durbin,A., Rocchi,I., Williams,T., Hall,C.B., Tesini,B.L., Schnabel,K.C., Walsh,E.E. and Caserta,M.                                                                                     |
| EPI_ISL_2582959                                                                                                                        | Epidemiology and Demography Department, KEMRI-Wellcome Trust Research Programme          | Epidemiology and Demography Department, KEMRI-Wellcome Trust Research Programme          | Otieno,J.R., Kamau,E.M., Oketch,J.W., Ngoi,J.M., Agoti,C.N., Gichuki,A.M., Otieno,G.P., Ngama,M., Cane,P.A., Kellam,P., Cotten,M., Lemey,P. and Nokes,D.J.                                                                                                                                   |
| EPI_ISL_2582964, EPI_ISL_2582967                                                                                                       | Pediatrics - Infectious Diseases, Medical College of Wisconsin                           | Pediatrics - Infectious Diseases, Medical College of Wisconsin                           | Rebuffo-Scheer,C., Bose,M.E., He,J., Khajaja,S., Ulatowski,M., Beck,E.T., Fan,J., Kumar,S., Nelson,M.I. and Henrickson,K.J.                                                                                                                                                                  |
| EPI_ISL_2582970                                                                                                                        | Epidemiology and Demography Department, KEMRI-Wellcome Trust Research Programme          | Epidemiology and Demography Department, KEMRI-Wellcome Trust Research Programme          | Otieno,J.R., Kamau,E.M., Oketch,J.W., Ngoi,J.M., Agoti,C.N., Gichuki,A.M., Otieno,G.P., Ngama,M., Cane,P.A., Kellam,P., Cotten,M., Lemey,P. and Nokes,D.J.                                                                                                                                   |
| EPI_ISL_2582972, EPI_ISL_2582975                                                                                                       | Pediatrics - Infectious Diseases, Medical College of Wisconsin                           | Pediatrics - Infectious Diseases, Medical College of Wisconsin                           | Rebuffo-Scheer,C., Bose,M.E., He,J., Khajaja,S., Ulatowski,M., Beck,E.T., Fan,J., Kumar,S., Nelson,M.I. and Henrickson,K.J.                                                                                                                                                                  |
| EPI_ISL_2582976                                                                                                                        | Infectious Disease Initiative, Broad Institute                                           | Infectious Disease Initiative, Broad Institute                                           | Newman,R.M., Zody,M.C., DeVincenzo,J.P., Grad,Y., Lipsitch,M., Murphy,R., Fitzgerald,M., Young,S., Gargeya,S., Poon,T.W., Charlebois,P., Weiner,B., Yang,X., Piper,M.E., McCowan,C., Ireland,A., Levin,J., Malboeuf,C., Qu,J., Chapman,S.B., Murphy,C., Wortman,J., Nusbaum,C. and Birren,B. |
| EPI_ISL_2582981                                                                                                                        | Pediatrics - Infectious Diseases, Medical College of Wisconsin                           | Pediatrics - Infectious Diseases, Medical College of Wisconsin                           | Rebuffo-Scheer,C., Bose,M.E., He,J., Khajaja,S., Ulatowski,M., Beck,E.T., Fan,J., Kumar,S., Nelson,M.I. and Henrickson,K.J.                                                                                                                                                                  |
| EPI_ISL_2582986, EPI_ISL_2582988, EPI_ISL_2582991, EPI_ISL_2582994, EPI_ISL_2582997, EPI_ISL_2583000, EPI_ISL_2583003, EPI_ISL_2583004 | Broad Institute of MIT & Harvard                                                         | Broad Institute of MIT & Harvard                                                         | Newman,R.M., Zody,M.C., DeVincenzo,J.P., Grad,Y., Lipsitch,M., Murphy,R., Fitzgerald,M., Young,S., Gargeya,S., Poon,T.W., Charlebois,P., Weiner,B., Yang,X., Piper,M.E., McCowan,C., Ireland,A., Levin,J., Malboeuf,C., Qu,J., Chapman,S.B., Murphy,C., Wortman,J., Nusbaum,C. and Birren,B. |
| EPI_ISL_2583007                                                                                                                        | Pediatrics - Infectious Diseases, Medical College of Wisconsin                           | Pediatrics - Infectious Diseases, Medical College of Wisconsin                           | Rebuffo-Scheer,C., Bose,M.E., He,J., Khajaja,S., Ulatowski,M., Beck,E.T., Fan,J., Kumar,S., Nelson,M.I. and Henrickson,K.J.                                                                                                                                                                  |
| EPI_ISL_2583008, EPI_ISL_2583012                                                                                                       | Broad Institute of MIT & Harvard                                                         | Broad Institute of MIT & Harvard                                                         | Newman,R.M., Zody,M.C., DeVincenzo,J.P., Grad,Y., Lipsitch,M., Murphy,R., Fitzgerald,M., Young,S., Gargeya,S., Poon,T.W., Charlebois,P., Weiner,B., Yang,X., Piper,M.E., McCowan,C., Ireland,A., Levin,J., Malboeuf,C., Qu,J., Chapman,S.B., Murphy,C., Wortman,J., Nusbaum,C. and Birren,B. |
| EPI_ISL_2583013                                                                                                                        | Pediatrics - Infectious Diseases, Medical College of Wisconsin                           | Pediatrics - Infectious Diseases, Medical College of Wisconsin                           | Rebuffo-Scheer,C., Bose,M.E., He,J., Khajaja,S., Ulatowski,M., Beck,E.T., Fan,J., Kumar,S., Nelson,M.I. and Henrickson,K.J.                                                                                                                                                                  |
| EPI_ISL_2583016, EPI_ISL_2583017, EPI_ISL_2583019, EPI_ISL_2583020, EPI_ISL_2583022                                                    | Broad Institute of MIT & Harvard                                                         | Broad Institute of MIT & Harvard                                                         | Newman,R.M., Zody,M.C., DeVincenzo,J.P., Grad,Y., Lipsitch,M., Murphy,R., Fitzgerald,M., Young,S., Gargeya,S., Poon,T.W., Charlebois,P., Weiner,B., Yang,X., Piper,M.E., McCowan,C., Ireland,A., Levin,J., Malboeuf,C., Qu,J., Chapman,S.B., Murphy,C., Wortman,J., Nusbaum,C. and Birren,B. |
| EPI_ISL_2583023, EPI_ISL_2583024                                                                                                       | Epidemiology and Demography Department, KEMRI-Wellcome Trust Research Programme          | Epidemiology and Demography Department, KEMRI-Wellcome Trust Research Programme          | Otieno,J.R., Kamau,E.M., Oketch,J.W., Ngoi,J.M., Agoti,C.N., Gichuki,A.M., Otieno,G.P., Ngama,M., Cane,P.A., Kellam,P., Cotten,M., Lemey,P. and Nokes,D.J.                                                                                                                                   |
| EPI_ISL_2583026                                                                                                                        | Medicine, University of Washington, 300 9th Ave, Harborview Research & Training Building | Medicine, University of Washington, 300 9th Ave, Harborview Research & Training Building | Chu,H., Scott,E. and Roychoudhury,P.                                                                                                                                                                                                                                                         |
| EPI_ISL_2583029                                                                                                                        | Broad Institute of MIT & Harvard                                                         | Broad Institute of MIT & Harvard                                                         | Newman,R.M., Zody,M.C., DeVincenzo,J.P., Grad,Y., Lipsitch,M., Murphy,R., Fitzgerald,M., Young,S., Gargeya,S., Poon,T.W., Charlebois,P., Weiner,B., Yang,X., Piper,M.E., McCowan,C., Ireland,A., Levin,J., Malboeuf,C., Qu,J., Chapman,S.B., Murphy,C., Wortman,J., Nusbaum,C. and Birren,B. |
| EPI_ISL_2583031                                                                                                                        | Pediatrics - Infectious Diseases, Medical College of Wisconsin                           | Pediatrics - Infectious Diseases, Medical College of Wisconsin                           | Rebuffo-Scheer,C., Bose,M.E., He,J., Khajaja,S., Ulatowski,M., Beck,E.T., Fan,J., Kumar,S., Nelson,M.I. and Henrickson,K.J.                                                                                                                                                                  |
| EPI_ISL_2583034                                                                                                                        | Broad Institute of MIT & Harvard                                                         | Broad Institute of MIT & Harvard                                                         | Newman,R.M., Zody,M.C., DeVincenzo,J.P., Grad,Y., Lipsitch,M., Murphy,R., Fitzgerald,M., Young,S., Gargeya,S., Poon,T.W., Charlebois,P., Weiner,B., Yang,X., Piper,M.E., McCowan,C., Ireland,A., Levin,J., Malboeuf,C., Qu,J., Chapman,S.B., Murphy,C., Wortman,J., Nusbaum,C. and Birren,B. |

|                                                                                                                                                                          |                                                                                          |                                                                                          |                                                                                                                                                                                                                                                                                              |
|--------------------------------------------------------------------------------------------------------------------------------------------------------------------------|------------------------------------------------------------------------------------------|------------------------------------------------------------------------------------------|----------------------------------------------------------------------------------------------------------------------------------------------------------------------------------------------------------------------------------------------------------------------------------------------|
| EPI_ISL_2583038                                                                                                                                                          | Pediatrics, University of New Mexico                                                     | Pediatrics, University of New Mexico                                                     | Kothari,A., Kennedy,J.L., Schwalm,K.C., Putt,C., Denson,J.L. and Dinwiddie,D.L.                                                                                                                                                                                                              |
| EPI_ISL_2583040                                                                                                                                                          | Broad Institute of MIT & Harvard                                                         | Broad Institute of MIT & Harvard                                                         | Newman,R.M., Zody,M.C., DeVincenzo,J.P., Grad,Y., Lipsitch,M., Murphy,R., Fitzgerald,M., Young,S., Gargeya,S., Poon,T.W., Charlebois,P., Weiner,B., Yang,X., Piper,M.E., McCowan,C., Ireland,A., Levin,J., Malboeuf,C., Qu,J., Chapman,S.B., Murphy,C., Wortman,J., Nusbaum,C. and Birren,B. |
| EPI_ISL_2583042                                                                                                                                                          | Pediatrics, University of New Mexico                                                     | Pediatrics, University of New Mexico                                                     | Kothari,A., Kennedy,J.L., Schwalm,K.C., Putt,C., Denson,J.L. and Dinwiddie,D.L.                                                                                                                                                                                                              |
| EPI_ISL_2583045, EPI_ISL_2583046, EPI_ISL_2583048, EPI_ISL_2583050, EPI_ISL_2583054, EPI_ISL_2583055                                                                     | Broad Institute of MIT & Harvard                                                         | Broad Institute of MIT & Harvard                                                         | Newman,R.M., Zody,M.C., DeVincenzo,J.P., Grad,Y., Lipsitch,M., Murphy,R., Fitzgerald,M., Young,S., Gargeya,S., Poon,T.W., Charlebois,P., Weiner,B., Yang,X., Piper,M.E., McCowan,C., Ireland,A., Levin,J., Malboeuf,C., Qu,J., Chapman,S.B., Murphy,C., Wortman,J., Nusbaum,C. and Birren,B. |
| EPI_ISL_2583057                                                                                                                                                          | Pediatrics - Infectious Diseases, Medical College of Wisconsin                           | Pediatrics - Infectious Diseases, Medical College of Wisconsin                           | Rebuffo-Scheer,C., Bose,M.E., He,J., Khaja,S., Ulatowski,M., Beck,E.T., Fan,J., Kumar,S., Nelson,M.I. and Henrickson,K.J.                                                                                                                                                                    |
| EPI_ISL_2583061, EPI_ISL_2583062, EPI_ISL_2583063                                                                                                                        | Pediatrics, University of New Mexico                                                     | Pediatrics, University of New Mexico                                                     | Kothari,A., Kennedy,J.L., Schwalm,K.C., Putt,C., Denson,J.L. and Dinwiddie,D.L.                                                                                                                                                                                                              |
| EPI_ISL_2583065                                                                                                                                                          | Pediatrics - Infectious Diseases, Medical College of Wisconsin                           | Pediatrics - Infectious Diseases, Medical College of Wisconsin                           | Rebuffo-Scheer,C., Bose,M.E., He,J., Khaja,S., Ulatowski,M., Beck,E.T., Fan,J., Kumar,S., Nelson,M.I. and Henrickson,K.J.                                                                                                                                                                    |
| EPI_ISL_2583068, EPI_ISL_2583072, EPI_ISL_2583074                                                                                                                        | Broad Institute of MIT & Harvard                                                         | Broad Institute of MIT & Harvard                                                         | Newman,R.M., Zody,M.C., DeVincenzo,J.P., Grad,Y., Lipsitch,M., Murphy,R., Fitzgerald,M., Young,S., Gargeya,S., Poon,T.W., Charlebois,P., Weiner,B., Yang,X., Piper,M.E., McCowan,C., Ireland,A., Levin,J., Malboeuf,C., Qu,J., Chapman,S.B., Murphy,C., Wortman,J., Nusbaum,C. and Birren,B. |
| EPI_ISL_2583076                                                                                                                                                          | Pediatrics, University of New Mexico                                                     | Pediatrics, University of New Mexico                                                     | Kothari,A., Kennedy,J.L., Schwalm,K.C., Putt,C., Denson,J.L. and Dinwiddie,D.L.                                                                                                                                                                                                              |
| EPI_ISL_2583078, EPI_ISL_2583080, EPI_ISL_2583082                                                                                                                        | Broad Institute of MIT & Harvard                                                         | Broad Institute of MIT & Harvard                                                         | Newman,R.M., Zody,M.C., DeVincenzo,J.P., Grad,Y., Lipsitch,M., Murphy,R., Fitzgerald,M., Young,S., Gargeya,S., Poon,T.W., Charlebois,P., Weiner,B., Yang,X., Piper,M.E., McCowan,C., Ireland,A., Levin,J., Malboeuf,C., Qu,J., Chapman,S.B., Murphy,C., Wortman,J., Nusbaum,C. and Birren,B. |
| EPI_ISL_2583083                                                                                                                                                          | Pediatrics - Infectious Diseases, Medical College of Wisconsin                           | Pediatrics - Infectious Diseases, Medical College of Wisconsin                           | Rebuffo-Scheer,C., Bose,M.E., He,J., Khaja,S., Ulatowski,M., Beck,E.T., Fan,J., Kumar,S., Nelson,M.I. and Henrickson,K.J.                                                                                                                                                                    |
| EPI_ISL_2583085, EPI_ISL_2583087                                                                                                                                         | Broad Institute of MIT & Harvard                                                         | Broad Institute of MIT & Harvard                                                         | Newman,R.M., Zody,M.C., DeVincenzo,J.P., Grad,Y., Lipsitch,M., Murphy,R., Fitzgerald,M., Young,S., Gargeya,S., Poon,T.W., Charlebois,P., Weiner,B., Yang,X., Piper,M.E., McCowan,C., Ireland,A., Levin,J., Malboeuf,C., Qu,J., Chapman,S.B., Murphy,C., Wortman,J., Nusbaum,C. and Birren,B. |
| EPI_ISL_2583091                                                                                                                                                          | Epidemiology and Demography Department, KEMRI-Wellcome Trust Research Programme          | Epidemiology and Demography Department, KEMRI-Wellcome Trust Research Programme          | Otieno,J.R., Kamau,E.M., Oketch,J.W., Ngoi,J.M., Agoti,C.N., Gichuki,A.M., Otieno,G.P., Ngama,M., Cane,P.A., Kellam,P., Cotten,M., Lemey,P. and Nokes,D.J.                                                                                                                                   |
| EPI_ISL_2583092                                                                                                                                                          | Broad Institute of MIT & Harvard                                                         | Broad Institute of MIT & Harvard                                                         | Newman,R.M., Zody,M.C., DeVincenzo,J.P., Grad,Y., Lipsitch,M., Murphy,R., Fitzgerald,M., Young,S., Gargeya,S., Poon,T.W., Charlebois,P., Weiner,B., Yang,X., Piper,M.E., McCowan,C., Ireland,A., Levin,J., Malboeuf,C., Qu,J., Chapman,S.B., Murphy,C., Wortman,J., Nusbaum,C. and Birren,B. |
| EPI_ISL_2584483, EPI_ISL_2584484, EPI_ISL_2584485, EPI_ISL_2584486                                                                                                       | J. Craig Venter Institute                                                                | J. Craig Venter Institute                                                                | Shabman,R., Das,S.R., Puri,V., Fedorova,N., Amedeo,P., Williams,M., Shrivastava,S. and Halasa,N.                                                                                                                                                                                             |
| EPI_ISL_2584489, EPI_ISL_2584491, EPI_ISL_2584492, EPI_ISL_2584494, EPI_ISL_2584496, EPI_ISL_2584497, EPI_ISL_2584498, EPI_ISL_2584499, EPI_ISL_2584500, EPI_ISL_2584504 | Epidemiology and Demography, KEMRI-Wellcome Trust                                        | Epidemiology and Demography, KEMRI-Wellcome Trust                                        | Kamau,E., Otieno,J.R., Murunga,N., Nyiro,J.U., Oketch,J.W., Ngoi,J.M., de Laurent,Z.R., Mwema,A., Agoti,C.N. and Nokes,D.J.                                                                                                                                                                  |
| EPI_ISL_2584505                                                                                                                                                          | Medical Microbiology, University Medical Center Utrecht                                  | Medical Microbiology, University Medical Center Utrecht                                  | Tan,L., Viveen,M.C., Lemey,P. and Coenjaerts,F.E.                                                                                                                                                                                                                                            |
| EPI_ISL_2584506                                                                                                                                                          | Medical Microbiology, University Medical Center Utrecht                                  | Medical Microbiology, University Medical Center Utrecht                                  | Tan,L., Lemey,P., Viveen,M. and Coenjaerts,F.                                                                                                                                                                                                                                                |
| EPI_ISL_2584511, EPI_ISL_2584512, EPI_ISL_2584513, EPI_ISL_2584514, EPI_ISL_2584515, EPI_ISL_2584516                                                                     | J. Craig Venter Institute                                                                | J. Craig Venter Institute                                                                | Shabman,R., Das,S.R., Shilts,M., Fedorova,N., Puri,V., Shrivastava,S., Amedeo,P., Williams,M., Barratt,K., Mitchell,J. and Jennings,L.                                                                                                                                                       |
| EPI_ISL_2584518                                                                                                                                                          | J. Craig Venter Institute                                                                | J. Craig Venter Institute                                                                | Wentworth,D.E., Halpin,R.A., Bera,J., Lin,X., Fedorova,N., Tsitrin,T., McLellan,M., Stockwell,T., Amedeo,P., Bishop,B., Gupta,N., Hoover,J., Katzel,D., Schobel,S., Shrivastava,S., Garcia,J., Laguna-Torres,V.A., Leguia,M., Benavides,J.G. and Halsey,E.                                   |
| EPI_ISL_2584558, EPI_ISL_2584560, EPI_ISL_2584562, EPI_ISL_2584565, EPI_ISL_2584566, EPI_ISL_2584568, EPI_ISL_2584569, EPI_ISL_2584570                                   | J. Craig Venter Institute                                                                | J. Craig Venter Institute                                                                | Das,S.R., Halpin,R.A., Shilts,M., Puri,V., Akopov,A., Fedorova,N., Stockwell,T., Amedeo,P., Bishop,B., Katzel,D., Schobel,S., Shrivastava,S. and Hartert,T.                                                                                                                                  |
| EPI_ISL_2584571, EPI_ISL_2584572                                                                                                                                         | J. Craig Venter Institute                                                                | J. Craig Venter Institute                                                                | Wentworth,D.E., Halpin,R.A., Bera,J., Lin,X., Fedorova,N., Tsitrin,T., McLellan,M., Stockwell,T., Amedeo,P., Bishop,B., Gupta,N., Hoover,J., Katzel,D., Schobel,S., Shrivastava,S., Garcia,J., Laguna-Torres,V.A., Leguia,M., Benavides,J.G. and Halsey,E.                                   |
| EPI_ISL_2584579, EPI_ISL_2584582                                                                                                                                         | Medicine, University of Washington, 300 9th Ave, Harborview Research & Training Building | Medicine, University of Washington, 300 9th Ave, Harborview Research & Training Building | Chu,H., Scott,E. and Roychoudhury,P.                                                                                                                                                                                                                                                         |
| EPI_ISL_2584583                                                                                                                                                          | J. Craig Venter Institute                                                                | J. Craig Venter Institute                                                                | Shabman,R., Das,S.R., Puri,V., Fedorova,N., Amedeo,P., Williams,M., Shrivastava,S. and Halasa,N.                                                                                                                                                                                             |
| EPI_ISL_2584584, EPI_ISL_2584585, EPI_ISL_2584586, EPI_ISL_2584587                                                                                                       | J. Craig Venter Institute                                                                | J. Craig Venter Institute                                                                | Das,S.R., Halpin,R.A., Shilts,M., Puri,V., Akopov,A., Fedorova,N., Stockwell,T., Amedeo,P., Bishop,B., Katzel,D., Schobel,S., Shrivastava,S. and Hartert,T.                                                                                                                                  |
| EPI_ISL_2584588                                                                                                                                                          | J. Craig Venter Institute                                                                | J. Craig Venter Institute                                                                | Das,S., Halpin,R.A., Bera,J., Puri,V., Fedorova,N., Tsitrin,T., Stockwell,T., Amedeo,P., Bishop,B., Katzel,D., Schobel,S., Shrivastava,S., Hartert,T., Moore,M., Chappell,J., Larkin,E., Wentworth,D.E. and Anderson,L.J.                                                                    |
| EPI_ISL_2584590                                                                                                                                                          | J. Craig Venter Institute                                                                | J. Craig Venter Institute                                                                | Das,S.R., Halpin,R.A., Puri,V., Akopov,A., Fedorova,N., Stockwell,T., Amedeo,P., Bishop,B., Katzel,D., Schobel,S., Shrivastava,S., Hall,C.B., Tesini,B.L., Schnabel,K.C., Walsh,E.E. and Caserta,M.                                                                                          |
| EPI_ISL_2584591, EPI_ISL_2584592, EPI_ISL_2584593, EPI_ISL_2584594                                                                                                       | Epidemiology and Demography, KEMRI-Wellcome Trust                                        | Epidemiology and Demography, KEMRI-Wellcome Trust                                        | Kamau,E., Otieno,J.R., Murunga,N., Nyiro,J.U., Oketch,J.W., Ngoi,J.M., de Laurent,Z.R., Mwema,A., Agoti,C.N. and Nokes,D.J.                                                                                                                                                                  |
| EPI_ISL_2584595                                                                                                                                                          | J. Craig Venter Institute                                                                | J. Craig Venter Institute                                                                | Das,S.R., Halpin,R.A., Shilts,M., Puri,V., Akopov,A., Fedorova,N., Stockwell,T., Amedeo,P., Bishop,B., Katzel,D., Schobel,S., Shrivastava,S. and Hartert,T.                                                                                                                                  |
| EPI_ISL_2584596                                                                                                                                                          | J. Craig Venter Institute                                                                | J. Craig Venter Institute                                                                | Das,S.R., Halpin,R.A., Puri,V., Akopov,A., Fedorova,N., Stockwell,T., Amedeo,P., Bishop,B., Katzel,D., Schobel,S., Shrivastava,S., Hall,C.B., Tesini,B.L., Schnabel,K.C., Walsh,E.E. and Caserta,M.                                                                                          |
| EPI_ISL_2584597                                                                                                                                                          | Pediatrics, UT Southwestern Medical Center                                               | Pediatrics, UT Southwestern Medical Center                                               | Levitz,R., Gao,Y., Dozmorov,I., Song,R., Wakeland,E.K. and Kahn,J.S.                                                                                                                                                                                                                         |
| EPI_ISL_2584598                                                                                                                                                          | Medical Microbiology, University Medical Center Utrecht                                  | Medical Microbiology, University Medical Center Utrecht                                  | Tan,L., Lemey,P., Viveen,M. and Coenjaerts,F.E.J.                                                                                                                                                                                                                                            |
| EPI_ISL_2584599, EPI_ISL_2584600                                                                                                                                         | J. Craig Venter Institute                                                                | J. Craig Venter Institute                                                                | Das,S.R., Halpin,R.A., Puri,V., Akopov,A., Fedorova,N., Stockwell,T., Amedeo,P., Bishop,B., Katzel,D., Schobel,S., Shrivastava,S., Hall,C.B., Tesini,B.L., Schnabel,K.C., Walsh,E.E. and Caserta,M.                                                                                          |
| EPI_ISL_2584601                                                                                                                                                          | J. Craig Venter Institute                                                                | J. Craig Venter Institute                                                                | Das,S.R., Halpin,R.A., Puri,V., Akopov,A., Fedorova,N., Stockwell,T., Amedeo,P., Bishop,B., Katzel,D., Schobel,S., Shrivastava,S., Wentworth,D.E. and Caserta,M.                                                                                                                             |
| EPI_ISL_2584602                                                                                                                                                          | Medical Microbiology, University Medical Center Utrecht                                  | Medical Microbiology, University Medical Center Utrecht                                  | Tan,L., Lemey,P., Viveen,M. and Coenjaerts,F.E.J.                                                                                                                                                                                                                                            |
| EPI_ISL_2584604                                                                                                                                                          | J. Craig Venter Institute                                                                | J. Craig Venter Institute                                                                | Das,S.R., Halpin,R.A., Puri,V., Akopov,A., Fedorova,N., Tsitrin,T., Stockwell,T., Amedeo,P., Bishop,B., Gupta,N., Hoover,J., Katzel,D., Schobel,S., Shrivastava,S., Wentworth,D.E. and Caserta,M.                                                                                            |
| EPI_ISL_2584605, EPI_ISL_2584606, EPI_ISL_2584610, EPI_ISL_2584611, EPI_ISL_2584613, EPI_ISL_2584614                                                                     | J. Craig Venter Institute                                                                | J. Craig Venter Institute                                                                | Das,S.R., Halpin,R.A., Puri,V., Akopov,A., Fedorova,N., Stockwell,T., Amedeo,P., Bishop,B., Katzel,D., Schobel,S., Shrivastava,S., Hall,C.B., Tesini,B.L., Schnabel,K.C., Walsh,E.E. and Caserta,M.                                                                                          |

|                                                                                                                       |                                                                                                            |                                                                                                            |                                                                                                                                                                                                                                                                                                                                                                           |
|-----------------------------------------------------------------------------------------------------------------------|------------------------------------------------------------------------------------------------------------|------------------------------------------------------------------------------------------------------------|---------------------------------------------------------------------------------------------------------------------------------------------------------------------------------------------------------------------------------------------------------------------------------------------------------------------------------------------------------------------------|
| EPI_ISL_2584615                                                                                                       | J. Craig Venter Institute                                                                                  | J. Craig Venter Institute                                                                                  | Das,S.R., Halpin,R.A., Puri,V., Akopov,A., Fedorova,N., Stockwell,T., Amedeo,P., Bishop,B., Katzel,D., Schobel,S., Shrivastava,S., Wentworth,D.E. and Caserta,M.                                                                                                                                                                                                          |
| EPI_ISL_2584617                                                                                                       | Pediatrics and Microbiology, University of Texas Southwestern Medical Center                               | Pediatrics and Microbiology, University of Texas Southwestern Medical Center                               | Levitz,R., Wattier,R., Phillips,P., Solomon,A., Lawler,J., Lazar,I. and Kahn,J.S.                                                                                                                                                                                                                                                                                         |
| EPI_ISL_2584618                                                                                                       | J. Craig Venter Institute                                                                                  | J. Craig Venter Institute                                                                                  | Das,S.R., Halpin,R.A., Puri,V., Akopov,A., Fedorova,N., Stockwell,T., Amedeo,P., Bishop,B., Katzel,D., Schobel,S., Shrivastava,S., Wentworth,D.E. and Caserta,M.                                                                                                                                                                                                          |
| EPI_ISL_2584619                                                                                                       | J. Craig Venter Institute                                                                                  | J. Craig Venter Institute                                                                                  | Das,S.R., Halpin,R.A., Puri,V., Akopov,A., Fedorova,N., Stockwell,T., Amedeo,P., Bishop,B., Katzel,D., Schobel,S., Shrivastava,S., Hall,C.B., Tesini,B.L., Schnabel,K.C., Walsh,E.E. and Caserta,M.                                                                                                                                                                       |
| EPI_ISL_2584620                                                                                                       | J. Craig Venter Institute                                                                                  | J. Craig Venter Institute                                                                                  | Das,S.R., Halpin,R.A., Puri,V., Akopov,A., Fedorova,N., Stockwell,T., Amedeo,P., Bishop,B., Katzel,D., Schobel,S., Shrivastava,S., Wentworth,D.E. and Caserta,M.                                                                                                                                                                                                          |
| EPI_ISL_2584621                                                                                                       | Biología Molecular y Validación de Técnicas, Instituto de Diagnóstico y Referencia Epidemiológicos (InDRE) | Biología Molecular y Validación de Técnicas, Instituto de Diagnóstico y Referencia Epidemiológicos (InDRE) | Ortiz-Alcantara,J.M., Garces-Ayala,F., Perez-Agueros,S.I., Hernandez-Moreno,A.L., Munoz-Medina,J.E., Monroy-Munoz,I.E., Santos Coy-Arechavaleta,A., Meza-Chavez,A., Angeles-Martinez,J., Anguiano-Hernandez,Y.-M., Martinez-Miguel,B., Santacruz-Tinoco,C.E., Gonzalez-Ibarra,J., Alvarado-Yaah,J.E., Gonzalez-Bonilla,C.R., Diaz-Quinonez,J.A. and Ramirez-Gonzalez,J.E. |
| EPI_ISL_2584622                                                                                                       | Medical Microbiology, University Medical Center Utrecht                                                    | Medical Microbiology, University Medical Center Utrecht                                                    | Tan,L., Viveen,M.C., Lemey,P. and Coenjaerts,F.E.                                                                                                                                                                                                                                                                                                                         |
| EPI_ISL_2584623                                                                                                       | J. Craig Venter Institute                                                                                  | J. Craig Venter Institute                                                                                  | Wentworth,D.E., Halpin,R.A., Bera,J., Lin,X., Fedorova,N., Tsitrin,T., McLellan,M., Stockwell,T., Amedeo,P., Bishop,B., Gupta,N., Hoover,J., Katzel,D., Schobel,S., Shrivastava,S., Garcia,J., Laguna-Torres,V.A., Leguia,M., Benavides,J.G. and Halsey,E.                                                                                                                |
| EPI_ISL_2584624                                                                                                       | Medical Microbiology, University Medical Center Utrecht                                                    | Medical Microbiology, University Medical Center Utrecht                                                    | Tan,L., Viveen,M.C., Lemey,P. and Coenjaerts,F.E.                                                                                                                                                                                                                                                                                                                         |
| EPI_ISL_2584626                                                                                                       | KEMRI Wellcome Trust Research Programme                                                                    | KEMRI Wellcome Trust Research Programme                                                                    | Agoti,C.N., Otieno,J.R., Munywoki,P.K., Mwihuri,A.G., Cane,P.A., Nokes,D.J., Kellam,P. and Cotten,M.L.                                                                                                                                                                                                                                                                    |
| EPI_ISL_2584627                                                                                                       | Virology, Public Health Institution of Turkey                                                              | Virology, Public Health Institution of Turkey                                                              | Bayraktar,F.                                                                                                                                                                                                                                                                                                                                                              |
| EPI_ISL_2584628                                                                                                       | J. Craig Venter Institute                                                                                  | J. Craig Venter Institute                                                                                  | Shabman,R., Das,S.R., Shilts,M., Fedorova,N., Puri,V., Shrivastava,S., Amedeo,P., Williams,M., Barratt,K., Mitchell,J. and Jennings,L.                                                                                                                                                                                                                                    |
| EPI_ISL_2584630                                                                                                       | J. Craig Venter Institute                                                                                  | J. Craig Venter Institute                                                                                  | Wentworth,D.E., Halpin,R.A., Bera,J., Lin,X., Fedorova,N., Tsitrin,T., McLellan,M., Stockwell,T., Amedeo,P., Bishop,B., Gupta,N., Hoover,J., Katzel,D., Schobel,S., Shrivastava,S., Garcia,J., Laguna-Torres,V.A., Leguia,M., Benavides,J.G. and Halsey,E.                                                                                                                |
| EPI_ISL_2584631, EPI_ISL_2584632                                                                                      | Medical Microbiology, University Medical Center Utrecht                                                    | Medical Microbiology, University Medical Center Utrecht                                                    | Tan,L., Viveen,M.C., Lemey,P. and Coenjaerts,F.E.                                                                                                                                                                                                                                                                                                                         |
| EPI_ISL_2584633                                                                                                       | J. Craig Venter Institute                                                                                  | J. Craig Venter Institute                                                                                  | Shabman,R., Das,S.R., Shilts,M., Fedorova,N., Puri,V., Shrivastava,S., Amedeo,P., Williams,M., Barratt,K., Mitchell,J. and Jennings,L.                                                                                                                                                                                                                                    |
| EPI_ISL_2584634                                                                                                       | Medical Microbiology, University Medical Center Utrecht                                                    | Medical Microbiology, University Medical Center Utrecht                                                    | Tan,L., Lemey,P., Viveen,M. and Coenjaerts,F.E.J.                                                                                                                                                                                                                                                                                                                         |
| EPI_ISL_2584635                                                                                                       | J. Craig Venter Institute                                                                                  | J. Craig Venter Institute                                                                                  | Das,S.R., Halpin,R.A., Shilts,M., Puri,V., Akopov,A., Fedorova,N., Stockwell,T., Amedeo,P., Bishop,B., Katzel,D., Schobel,S., Shrivastava,S. and Hartert,T.                                                                                                                                                                                                               |
| EPI_ISL_2584636, EPI_ISL_2584637                                                                                      | J. Craig Venter Institute                                                                                  | J. Craig Venter Institute                                                                                  | Shabman,R., Das,S.R., Shilts,M., Fedorova,N., Puri,V., Shrivastava,S., Amedeo,P., Williams,M., Barratt,K., Mitchell,J. and Jennings,L.                                                                                                                                                                                                                                    |
| EPI_ISL_2584638                                                                                                       | J. Craig Venter Institute                                                                                  | J. Craig Venter Institute                                                                                  | Shabman,R., Das,S.R., Puri,V., Fedorova,N., Amedeo,P., Williams,M., Shrivastava,S. and Halasa,N.                                                                                                                                                                                                                                                                          |
| EPI_ISL_2584639                                                                                                       | Biología Molecular y Validación de Técnicas, Instituto de Diagnóstico y Referencia Epidemiológicos (InDRE) | Biología Molecular y Validación de Técnicas, Instituto de Diagnóstico y Referencia Epidemiológicos (InDRE) | Munoz-Medina,J.E., Monroy-Munoz,I.E., Santos Coy-Arechavaleta,A., Meza-Chavez,A., Angeles-Martinez,J., Anguiano-Hernandez,Y.M., Santacruz-Tinoco,C.E., Gonzalez-Ibarra,J., Martinez-Miguel,B., Alvarado-Yaah,J.E., Palomec-Nava,I.D., Ortiz-Alcantara,J.M., Garces-Ayala,F., Ramirez-Gonzalez,J.E., Diaz-Quinonez,J.A. and Gonzalez-Bonilla,C.R.                          |
| EPI_ISL_2584640, EPI_ISL_2584641                                                                                      | J. Craig Venter Institute                                                                                  | J. Craig Venter Institute                                                                                  | Shabman,R., Das,S.R., Puri,V., Fedorova,N., Amedeo,P., Williams,M., Shrivastava,S. and Halasa,N.                                                                                                                                                                                                                                                                          |
| EPI_ISL_2584642                                                                                                       | Medical Microbiology, University Medical Center Utrecht                                                    | Medical Microbiology, University Medical Center Utrecht                                                    | Tan,L., Viveen,M.C., Lemey,P. and Coenjaerts,F.E.                                                                                                                                                                                                                                                                                                                         |
| EPI_ISL_2584644, EPI_ISL_2584646, EPI_ISL_2584648, EPI_ISL_2584650                                                    | J. Craig Venter Institute                                                                                  | J. Craig Venter Institute                                                                                  | Das,S.R., Halpin,R.A., Shilts,M., Puri,V., Akopov,A., Fedorova,N., Stockwell,T., Amedeo,P., Bishop,B., Katzel,D., Schobel,S., Shrivastava,S. and Hartert,T.                                                                                                                                                                                                               |
| EPI_ISL_2584652                                                                                                       | J. Craig Venter Institute                                                                                  | J. Craig Venter Institute                                                                                  | Das,S.R., Halpin,R.A., Puri,V., Akopov,A., Fedorova,N., Tsitrin,T., Stockwell,T., Amedeo,P., Bishop,B., Gupta,N., Hoover,J., Katzel,D., Schobel,S., Shrivastava,S., Wentworth,D.E. and Caserta,M.                                                                                                                                                                         |
| EPI_ISL_2584653, EPI_ISL_2584654                                                                                      | Epidemiology and Demography, KEMRI-Wellcome Trust                                                          | Epidemiology and Demography, KEMRI-Wellcome Trust                                                          | Kamau,E., Otieno,J.R., Murunga,N., Nyiro,J.U., Oketch,J.W., Ngoi,J.M., de Laurent,Z.R., Mwema,A., Agoti,C.N. and Nokes,D.J.                                                                                                                                                                                                                                               |
| EPI_ISL_2584656                                                                                                       | J. Craig Venter Institute                                                                                  | J. Craig Venter Institute                                                                                  | Shabman,R., Das,S.R., Shilts,M., Fedorova,N., Puri,V., Shrivastava,S., Amedeo,P., Williams,M., Barratt,K., Mitchell,J. and Jennings,L.                                                                                                                                                                                                                                    |
| EPI_ISL_2584657                                                                                                       | Epidemiology and Demography, KEMRI-Wellcome Trust                                                          | Epidemiology and Demography, KEMRI-Wellcome Trust                                                          | Kamau,E., Otieno,J.R., Murunga,N., Nyiro,J.U., Oketch,J.W., Ngoi,J.M., de Laurent,Z.R., Mwema,A., Agoti,C.N. and Nokes,D.J.                                                                                                                                                                                                                                               |
| EPI_ISL_2584658                                                                                                       | J. Craig Venter Institute                                                                                  | J. Craig Venter Institute                                                                                  | Shabman,R., Das,S.R., Shilts,M., Fedorova,N., Puri,V., Shrivastava,S., Amedeo,P., Williams,M., Barratt,K., Mitchell,J. and Jennings,L.                                                                                                                                                                                                                                    |
| EPI_ISL_2584659, EPI_ISL_2584660                                                                                      | J. Craig Venter Institute                                                                                  | J. Craig Venter Institute                                                                                  | Wentworth,D.E., Halpin,R.A., Bera,J., Lin,X., Fedorova,N., Tsitrin,T., McLellan,M., Stockwell,T., Amedeo,P., Bishop,B., Gupta,N., Hoover,J., Katzel,D., Schobel,S., Shrivastava,S., Garcia,J., Laguna-Torres,V.A., Leguia,M., Benavides,J.G. and Halsey,E.                                                                                                                |
| EPI_ISL_2584661                                                                                                       | Epidemiology and Demography, KEMRI-Wellcome Trust                                                          | Epidemiology and Demography, KEMRI-Wellcome Trust                                                          | Kamau,E., Otieno,J.R., Murunga,N., Nyiro,J.U., Oketch,J.W., Ngoi,J.M., de Laurent,Z.R., Mwema,A., Agoti,C.N. and Nokes,D.J.                                                                                                                                                                                                                                               |
| EPI_ISL_2584662                                                                                                       | J. Craig Venter Institute                                                                                  | J. Craig Venter Institute                                                                                  | Shabman,R., Das,S.R., Shilts,M., Fedorova,N., Puri,V., Shrivastava,S., Amedeo,P., Williams,M., Barratt,K., Mitchell,J. and Jennings,L.                                                                                                                                                                                                                                    |
| EPI_ISL_2584664, EPI_ISL_2584665, EPI_ISL_2584666, EPI_ISL_2584667, EPI_ISL_2584668, EPI_ISL_2584669, EPI_ISL_2584670 | Epidemiology and Demography, KEMRI-Wellcome Trust                                                          | Epidemiology and Demography, KEMRI-Wellcome Trust                                                          | Kamau,E., Otieno,J.R., Murunga,N., Nyiro,J.U., Oketch,J.W., Ngoi,J.M., de Laurent,Z.R., Mwema,A., Agoti,C.N. and Nokes,D.J.                                                                                                                                                                                                                                               |
| EPI_ISL_2584671                                                                                                       | J. Craig Venter Institute                                                                                  | J. Craig Venter Institute                                                                                  | Shabman,R., Das,S.R., Shilts,M., Fedorova,N., Puri,V., Shrivastava,S., Amedeo,P., Williams,M., Barratt,K., Mitchell,J. and Jennings,L.                                                                                                                                                                                                                                    |
| EPI_ISL_2584673, EPI_ISL_2584674                                                                                      | Epidemiology and Demography, KEMRI-Wellcome Trust                                                          | Epidemiology and Demography, KEMRI-Wellcome Trust                                                          | Kamau,E., Otieno,J.R., Murunga,N., Nyiro,J.U., Oketch,J.W., Ngoi,J.M., de Laurent,Z.R., Mwema,A., Agoti,C.N. and Nokes,D.J.                                                                                                                                                                                                                                               |
| EPI_ISL_2584675                                                                                                       | Medical Microbiology, University Medical Center Utrecht                                                    | Medical Microbiology, University Medical Center Utrecht                                                    | Tan,L., Lemey,P., Viveen,M. and Coenjaerts,F.E.                                                                                                                                                                                                                                                                                                                           |
| EPI_ISL_2584676, EPI_ISL_2584677                                                                                      | Epidemiology and Demography, KEMRI-Wellcome Trust                                                          | Epidemiology and Demography, KEMRI-Wellcome Trust                                                          | Kamau,E., Otieno,J.R., Murunga,N., Nyiro,J.U., Oketch,J.W., Ngoi,J.M., de Laurent,Z.R., Mwema,A., Agoti,C.N. and Nokes,D.J.                                                                                                                                                                                                                                               |
| EPI_ISL_2584678                                                                                                       | J. Craig Venter Institute                                                                                  | J. Craig Venter Institute                                                                                  | Das,S.R., Halpin,R.A., Puri,V., Akopov,A., Fedorova,N., Stockwell,T., Amedeo,P., Bishop,B., Katzel,D., Schobel,S., Shrivastava,S., Wentworth,D.E. and Caserta,M.                                                                                                                                                                                                          |
| EPI_ISL_2584680                                                                                                       | Epidemiology and Demography, KEMRI-Wellcome Trust                                                          | Epidemiology and Demography, KEMRI-Wellcome Trust                                                          | Kamau,E., Otieno,J.R., Murunga,N., Nyiro,J.U., Oketch,J.W., Ngoi,J.M., de Laurent,Z.R., Mwema,A., Agoti,C.N. and Nokes,D.J.                                                                                                                                                                                                                                               |
| EPI_ISL_2584681                                                                                                       | J. Craig Venter Institute                                                                                  | J. Craig Venter Institute                                                                                  | Das,S.R., Halpin,R.A., Puri,V., Akopov,A., Fedorova,N., Stockwell,T., Amedeo,P., Bishop,B., Katzel,D., Schobel,S., Shrivastava,S., Hall,C.B., Tesini,B.L., Schnabel,K.C., Walsh,E.E. and Caserta,M.                                                                                                                                                                       |
| EPI_ISL_2584682                                                                                                       | J. Craig Venter Institute                                                                                  | J. Craig Venter Institute                                                                                  | Das,S.R., Halpin,R.A., Puri,V., Akopov,A., Fedorova,N., Tsitrin,T., Stockwell,T., Amedeo,P., Bishop,B., Gupta,N., Hoover,J., Katzel,D., Schobel,S., Shrivastava,S., Wentworth,D.E. and Caserta,M.                                                                                                                                                                         |
| EPI_ISL_2584683, EPI_ISL_2584684, EPI_ISL_2584685                                                                     | J. Craig Venter Institute                                                                                  | J. Craig Venter Institute                                                                                  | Das,S.R., Halpin,R.A., Puri,V., Akopov,A., Fedorova,N., Stockwell,T., Amedeo,P., Bishop,B., Katzel,D., Schobel,S., Shrivastava,S., Hall,C.B., Tesini,B.L., Schnabel,K.C., Walsh,E.E. and Caserta,M.                                                                                                                                                                       |
| EPI_ISL_2584686                                                                                                       | J. Craig Venter Institute                                                                                  | J. Craig Venter Institute                                                                                  | Shabman,R., Das,S.R., Puri,V., Fedorova,N., Amedeo,P., Williams,M., Shrivastava,S. and Halasa,N.                                                                                                                                                                                                                                                                          |
| EPI_ISL_2584688, EPI_ISL_2584690, EPI_ISL_2584691                                                                     | Epidemiology and Demography, KEMRI-Wellcome Trust                                                          | Epidemiology and Demography, KEMRI-Wellcome Trust                                                          | Kamau,E., Otieno,J.R., Murunga,N., Nyiro,J.U., Oketch,J.W., Ngoi,J.M., de Laurent,Z.R., Mwema,A., Agoti,C.N. and Nokes,D.J.                                                                                                                                                                                                                                               |
| EPI_ISL_2584692                                                                                                       | Medicine, University of Washington, 300 9th Ave, Harborview                                                | Medicine, University of Washington, 300 9th Ave, Harborview                                                | Chu,H., Scott,E. and Roychoudhury,P.                                                                                                                                                                                                                                                                                                                                      |



|                                                                                                                                                                                                            | Research & Training Building                            | Research & Training Building                            |                                                                                                                                                                                                                                                                                                                                                                     |
|------------------------------------------------------------------------------------------------------------------------------------------------------------------------------------------------------------|---------------------------------------------------------|---------------------------------------------------------|---------------------------------------------------------------------------------------------------------------------------------------------------------------------------------------------------------------------------------------------------------------------------------------------------------------------------------------------------------------------|
| EPI_ISL_2584693                                                                                                                                                                                            | Epidemiology and Demography, KEMRI-Wellcome Trust       | Epidemiology and Demography, KEMRI-Wellcome Trust       | Kamau,E., Otieno,J.R., Murunga,N., Nyiro,J.U., Oketch,J.W., Ngoi,J.M., de Laurent,Z.R., Mwema,A., Agoti,C.N. and Nokes,D.J.                                                                                                                                                                                                                                         |
| EPI_ISL_2584696                                                                                                                                                                                            | J. Craig Venter Institute                               | J. Craig Venter Institute                               | Das,S.R., Halpin,R.A., Puri,V., Akopov,A., Fedorova,N., Tsitrin,T., Stockwell,T., Amedeo,P., Bishop,B., Gupta,N., Hoover,J., Katzel,D., Schobel,S., Shrivastava,S., Wentworth,D.E. and Caserta,M.                                                                                                                                                                   |
| EPI_ISL_2584697                                                                                                                                                                                            | J. Craig Venter Institute                               | J. Craig Venter Institute                               | Das,S.R., Halpin,R.A., Puri,V., Akopov,A., Fedorova,N., Stockwell,T., Amedeo,P., Bishop,B., Katzel,D., Schobel,S., Shrivastava,S., Wentworth,D.E. and Caserta,M.                                                                                                                                                                                                    |
| EPI_ISL_2584698                                                                                                                                                                                            | J. Craig Venter Institute                               | J. Craig Venter Institute                               | Das,S.R., Halpin,R.A., Puri,V., Akopov,A., Fedorova,N., Stockwell,T., Amedeo,P., Bishop,B., Katzel,D., Schobel,S., Shrivastava,S., Hall,C.B., Tesini,B.L., Schnabel,K.C., Walsh,E.E. and Caserta,M.                                                                                                                                                                 |
| EPI_ISL_2584699                                                                                                                                                                                            | Epidemiology and Demography, KEMRI-Wellcome Trust       | Epidemiology and Demography, KEMRI-Wellcome Trust       | Kamau,E., Otieno,J.R., Murunga,N., Nyiro,J.U., Oketch,J.W., Ngoi,J.M., de Laurent,Z.R., Mwema,A., Agoti,C.N. and Nokes,D.J.                                                                                                                                                                                                                                         |
| EPI_ISL_2584703, EPI_ISL_2584705                                                                                                                                                                           | J. Craig Venter Institute                               | J. Craig Venter Institute                               | Das,S.R., Halpin,R.A., Puri,V., Akopov,A., Fedorova,N., Stockwell,T., Amedeo,P., Bishop,B., Katzel,D., Schobel,S., Shrivastava,S., Hall,C.B., Tesini,B.L., Schnabel,K.C., Walsh,E.E. and Caserta,M.                                                                                                                                                                 |
| EPI_ISL_2584706, EPI_ISL_2584708, EPI_ISL_2584711, EPI_ISL_2584715, EPI_ISL_2584717, EPI_ISL_2584718, EPI_ISL_2584719, EPI_ISL_2584720, EPI_ISL_2584722, EPI_ISL_2584723, EPI_ISL_2584724, EPI_ISL_2584725 |                                                         |                                                         |                                                                                                                                                                                                                                                                                                                                                                     |
| see above                                                                                                                                                                                                  | Epidemiology and Demography, KEMRI-Wellcome Trust       | Epidemiology and Demography, KEMRI-Wellcome Trust       | Kamau,E., Otieno,J.R., Murunga,N., Nyiro,J.U., Oketch,J.W., Ngoi,J.M., de Laurent,Z.R., Mwema,A., Agoti,C.N. and Nokes,D.J.                                                                                                                                                                                                                                         |
| EPI_ISL_2584726                                                                                                                                                                                            | KEMRI Wellcome Trust Research Programme                 | KEMRI Wellcome Trust Research Programme                 | Agoti,C.N., Otieno,J.R., Munywoki,P.K., Mwihuri,A.G., Cane,P.A., Nokes,D.J., Kellam,P. and Cotten,M.L.                                                                                                                                                                                                                                                              |
| EPI_ISL_2584727                                                                                                                                                                                            | J. Craig Venter Institute                               | J. Craig Venter Institute                               | Das,S., Halpin,R.A., Bera,J., Fedorova,N., Tsitrin,T., Stockwell,T., Amedeo,P., Bishop,B., Gupta,N., Hoover,J., Katzel,D., Schobel,S., Shrivastava,S., Hartert,T., Moore,M., Chappell,J., Larkin,E., Wentworth,D.E. and Anderson,L.J.                                                                                                                               |
| EPI_ISL_2584728                                                                                                                                                                                            | J. Craig Venter Institute                               | J. Craig Venter Institute                               | Wentworth,D.E., Halpin,R.A., Bera,J., Lin,X., Fedorova,N., Tsitrin,T., McLellan,M., Stockwell,T., Amedeo,P., Bishop,B., Gupta,N., Hoover,J., Katzel,D., Schobel,S., Shrivastava,S., Garcia,J., Laguna-Torres,V.A., Leguia,M., Benavides,J.G. and Halsey,E.                                                                                                          |
| EPI_ISL_2584729                                                                                                                                                                                            | J. Craig Venter Institute                               | J. Craig Venter Institute                               | Das,S.R., Halpin,R.A., Shilts,M., Puri,V., Akopov,A., Fedorova,N., Stockwell,T., Amedeo,P., Bishop,B., Katzel,D., Schobel,S., Shrivastava,S. and Hartert,T.                                                                                                                                                                                                         |
| EPI_ISL_2584730, EPI_ISL_2584731                                                                                                                                                                           | Medical Microbiology, University Medical Center Utrecht | Medical Microbiology, University Medical Center Utrecht | Tan,L., Viveen,M.C., Lemey,P. and Coenjaerts,F.E.                                                                                                                                                                                                                                                                                                                   |
| EPI_ISL_2584732                                                                                                                                                                                            | J. Craig Venter Institute                               | J. Craig Venter Institute                               | Shabman,R., Das,S.R., Shilts,M., Fedorova,N., Puri,V., Shrivastava,S., Amedeo,P., Williams,M., Barratt,K., Mitchell,J. and Jennings,L.                                                                                                                                                                                                                              |
| EPI_ISL_2584733                                                                                                                                                                                            | J. Craig Venter Institute                               | J. Craig Venter Institute                               | Shabman,R., Das,S.R., Shilts,M., Fedorova,N., Puri,V., Shrivastava,S., Amedeo,P., Hu,L., Durbin,A., Rocchi,I., Williams,T. and Hartert,T.                                                                                                                                                                                                                           |
| EPI_ISL_2584734                                                                                                                                                                                            | J. Craig Venter Institute                               | J. Craig Venter Institute                               | Shabman,R., Das,S.R., Puri,V., Fedorova,N., Amedeo,P., Williams,M., Shrivastava,S. and Halasa,N.                                                                                                                                                                                                                                                                    |
| EPI_ISL_2584735, EPI_ISL_2584736                                                                                                                                                                           | J. Craig Venter Institute                               | J. Craig Venter Institute                               | Das,S.R., Halpin,R.A., Shilts,M., Puri,V., Akopov,A., Fedorova,N., Stockwell,T., Amedeo,P., Bishop,B., Katzel,D., Schobel,S., Shrivastava,S. and Hartert,T.                                                                                                                                                                                                         |
| EPI_ISL_2584737                                                                                                                                                                                            | J. Craig Venter Institute                               | J. Craig Venter Institute                               | Shabman,R., Das,S.R., Shilts,M., Fedorova,N., Puri,V., Shrivastava,S., Amedeo,P., Williams,M., Barratt,K., Mitchell,J. and Jennings,L.                                                                                                                                                                                                                              |
| EPI_ISL_2584738                                                                                                                                                                                            | Laboratory Medicine, UW Virology                        | Laboratory Medicine, UW Virology                        | Lin,M.J., Tait,A. and Greninger,A.L.                                                                                                                                                                                                                                                                                                                                |
| EPI_ISL_2584739                                                                                                                                                                                            | J. Craig Venter Institute                               | J. Craig Venter Institute                               | Das,S.R., Halpin,R.A., Shilts,M., Puri,V., Akopov,A., Fedorova,N., Stockwell,T., Amedeo,P., Bishop,B., Katzel,D., Schobel,S., Shrivastava,S. and Hartert,T.                                                                                                                                                                                                         |
| EPI_ISL_2584740                                                                                                                                                                                            | Medical Microbiology, University Medical Center Utrecht | Medical Microbiology, University Medical Center Utrecht | Tan,L., Viveen,M.C., Lemey,P. and Coenjaerts,F.E.                                                                                                                                                                                                                                                                                                                   |
| EPI_ISL_2584741                                                                                                                                                                                            | J. Craig Venter Institute                               | J. Craig Venter Institute                               | Lorezni,H., Town,C., Halpin,R., Bera,J., Ransier,A., Fedorova,N., Stockwell,T., Amedeo,P., Appalla,L., Bishop,B., Edworthy,P., Gupta,N., Hoover,J., Katzel,D., Li,K., Schobel,S., Shrivastava,S., Thovarai,V., Wang,S., Rebuffo-Scheer,C., Fan,J., He,J., Kehi,S.C., Lederboer,N., Jurgens,L.A., Bose,M.E., Beck,E.T., Kumar,S., Wentworth,D.E. and Henrickson,K.J. |
| EPI_ISL_2584742                                                                                                                                                                                            | J. Craig Venter Institute                               | J. Craig Venter Institute                               | Shabman,R., Das,S.R., Shilts,M., Fedorova,N., Puri,V., Shrivastava,S., Amedeo,P., Williams,M., Barratt,K., Mitchell,J. and Jennings,L.                                                                                                                                                                                                                              |
| EPI_ISL_2584745                                                                                                                                                                                            | J. Craig Venter Institute                               | J. Craig Venter Institute                               | Das,S.R., Halpin,R.A., Puri,V., Akopov,A., Fedorova,N., Stockwell,T., Amedeo,P., Bishop,B., Katzel,D., Schobel,S., Shrivastava,S., Wentworth,D.E. and Caserta,M.                                                                                                                                                                                                    |
| EPI_ISL_2584748, EPI_ISL_2584749                                                                                                                                                                           | J. Craig Venter Institute                               | J. Craig Venter Institute                               | Das,S.R., Halpin,R.A., Puri,V., Akopov,A., Fedorova,N., Stockwell,T., Amedeo,P., Bishop,B., Katzel,D., Schobel,S., Shrivastava,S., Hall,C.B., Tesini,B.L., Schnabel,K.C., Walsh,E.E. and Caserta,M.                                                                                                                                                                 |
| EPI_ISL_2584750, EPI_ISL_2584751                                                                                                                                                                           | J. Craig Venter Institute                               | J. Craig Venter Institute                               | Das,S.R., Halpin,R.A., Puri,V., Akopov,A., Fedorova,N., Stockwell,T., Amedeo,P., Bishop,B., Katzel,D., Schobel,S., Shrivastava,S., Wentworth,D.E. and Caserta,M.                                                                                                                                                                                                    |
| EPI_ISL_2584752                                                                                                                                                                                            | J. Craig Venter Institute                               | J. Craig Venter Institute                               | Das,S.R., Halpin,R.A., Puri,V., Akopov,A., Fedorova,N., Stockwell,T., Amedeo,P., Bishop,B., Katzel,D., Schobel,S., Shrivastava,S., Hall,C.B., Tesini,B.L., Schnabel,K.C., Walsh,E.E. and Caserta,M.                                                                                                                                                                 |
| EPI_ISL_2584753                                                                                                                                                                                            | J. Craig Venter Institute                               | J. Craig Venter Institute                               | Das,S.R., Halpin,R.A., Puri,V., Akopov,A., Fedorova,N., Stockwell,T., Amedeo,P., Bishop,B., Gupta,N., Hoover,J., Katzel,D., Schobel,S., Shrivastava,S., Wentworth,D.E. and Caserta,M.                                                                                                                                                                               |
| EPI_ISL_2584754, EPI_ISL_2584755, EPI_ISL_2584756                                                                                                                                                          | J. Craig Venter Institute                               | J. Craig Venter Institute                               | Das,S.R., Halpin,R.A., Puri,V., Akopov,A., Fedorova,N., Stockwell,T., Amedeo,P., Bishop,B., Katzel,D., Schobel,S., Shrivastava,S., Wentworth,D.E. and Caserta,M.                                                                                                                                                                                                    |
| EPI_ISL_2584760                                                                                                                                                                                            | J. Craig Venter Institute                               | J. Craig Venter Institute                               | Das,S.R., Halpin,R.A., Puri,V., Akopov,A., Fedorova,N., Tsitrin,T., Stockwell,T., Amedeo,P., Bishop,B., Gupta,N., Hoover,J., Katzel,D., Schobel,S., Shrivastava,S., Wentworth,D.E. and Caserta,M.                                                                                                                                                                   |
| EPI_ISL_2584762                                                                                                                                                                                            | J. Craig Venter Institute                               | J. Craig Venter Institute                               | Das,S.R., Halpin,R.A., Puri,V., Akopov,A., Fedorova,N., Stockwell,T., Amedeo,P., Bishop,B., Katzel,D., Schobel,S., Shrivastava,S., Hall,C.B., Tesini,B.L., Schnabel,K.C., Walsh,E.E. and Caserta,M.                                                                                                                                                                 |
| EPI_ISL_2584764                                                                                                                                                                                            | J. Craig Venter Institute                               | J. Craig Venter Institute                               | Das,S.R., Halpin,R.A., Puri,V., Akopov,A., Fedorova,N., Stockwell,T., Amedeo,P., Bishop,B., Katzel,D., Schobel,S., Shrivastava,S., Wentworth,D.E. and Caserta,M.                                                                                                                                                                                                    |
| EPI_ISL_2584765                                                                                                                                                                                            | J. Craig Venter Institute                               | J. Craig Venter Institute                               | Das,S.R., Halpin,R.A., Puri,V., Akopov,A., Fedorova,N., Stockwell,T., Amedeo,P., Bishop,B., Katzel,D., Schobel,S., Shrivastava,S., Hall,C.B., Tesini,B.L., Schnabel,K.C., Walsh,E.E. and Caserta,M.                                                                                                                                                                 |
| EPI_ISL_2584766                                                                                                                                                                                            | J. Craig Venter Institute                               | J. Craig Venter Institute                               | Das,S.R., Halpin,R.A., Puri,V., Akopov,A., Fedorova,N., Stockwell,T., Amedeo,P., Bishop,B., Katzel,D., Schobel,S., Shrivastava,S., Wentworth,D.E. and Caserta,M.                                                                                                                                                                                                    |
| EPI_ISL_2584768, EPI_ISL_2584770, EPI_ISL_2584771                                                                                                                                                          | J. Craig Venter Institute                               | J. Craig Venter Institute                               | Das,S.R., Halpin,R.A., Puri,V., Akopov,A., Fedorova,N., Stockwell,T., Amedeo,P., Bishop,B., Katzel,D., Schobel,S., Shrivastava,S., Hall,C.B., Tesini,B.L., Schnabel,K.C., Walsh,E.E. and Caserta,M.                                                                                                                                                                 |
| EPI_ISL_2584773, EPI_ISL_2584774                                                                                                                                                                           | Epidemiology and Demography, KEMRI-Wellcome Trust       | Epidemiology and Demography, KEMRI-Wellcome Trust       | Kamau,E., Otieno,J.R., Murunga,N., Nyiro,J.U., Oketch,J.W., Ngoi,J.M., de Laurent,Z.R., Mwema,A., Agoti,C.N. and Nokes,D.J.                                                                                                                                                                                                                                         |
| EPI_ISL_2584812                                                                                                                                                                                            | J. Craig Venter Institute                               | J. Craig Venter Institute                               | Shabman,R., Das,S.R., Puri,V., Fedorova,N., Amedeo,P., Williams,M., Shrivastava,S. and Halasa,N.                                                                                                                                                                                                                                                                    |
| EPI_ISL_2584814                                                                                                                                                                                            | J. Craig Venter Institute                               | J. Craig Venter Institute                               | Das,S.R., Halpin,R.A., Puri,V., Akopov,A., Fedorova,N., Tsitrin,T., Stockwell,T., Amedeo,P., Bishop,B., Gupta,N., Hoover,J., Katzel,D., Schobel,S., Shrivastava,S., Wentworth,D.E. and Caserta,M.                                                                                                                                                                   |
| EPI_ISL_2584815                                                                                                                                                                                            | J. Craig Venter Institute                               | J. Craig Venter Institute                               | Das,S., Halpin,R.A., Bera,J., Fedorova,N., Tsitrin,T., Stockwell,T., Amedeo,P., Bishop,B., Gupta,N., Hoover,J., Katzel,D., Schobel,S., Shrivastava,S., Hartert,T., Moore,M., Chappell,J., Larkin,E., Wentworth,D.E. and Anderson,L.J.                                                                                                                               |
| EPI_ISL_2584817                                                                                                                                                                                            | J. Craig Venter Institute                               | J. Craig Venter Institute                               | Das,S.R., Halpin,R.A., Puri,V., Akopov,A., Fedorova,N., Stockwell,T., Amedeo,P., Bishop,B., Katzel,D., Schobel,S., Shrivastava,S., Wentworth,D.E. and Caserta,M.                                                                                                                                                                                                    |
| EPI_ISL_2584818                                                                                                                                                                                            | J. Craig Venter Institute                               | J. Craig Venter Institute                               | Das,S.R., Halpin,R.A., Puri,V., Akopov,A., Fedorova,N., Tsitrin,T., Stockwell,T., Amedeo,P., Bishop,B., Gupta,N., Hoover,J., Katzel,D., Schobel,S., Shrivastava,S., Wentworth,D.E. and Caserta,M.                                                                                                                                                                   |
| EPI_ISL_2584819, EPI_ISL_2584820                                                                                                                                                                           | J. Craig Venter Institute                               | J. Craig Venter Institute                               | Das,S.R., Halpin,R.A., Puri,V., Akopov,A., Fedorova,N., Stockwell,T., Amedeo,P., Bishop,B., Katzel,D., Schobel,S., Shrivastava,S., Hall,C.B., Tesini,B.L.,                                                                                                                                                                                                          |

|                                                                                                                                                                                                                                                                                                                                                                                                                        |                                                                                          |                                                                                          |                                                                                                                                                                                                                                                            |
|------------------------------------------------------------------------------------------------------------------------------------------------------------------------------------------------------------------------------------------------------------------------------------------------------------------------------------------------------------------------------------------------------------------------|------------------------------------------------------------------------------------------|------------------------------------------------------------------------------------------|------------------------------------------------------------------------------------------------------------------------------------------------------------------------------------------------------------------------------------------------------------|
| EPI_ISL_2584824, EPI_ISL_2584847                                                                                                                                                                                                                                                                                                                                                                                       | KEMRI Wellcome Trust Research Programme                                                  | KEMRI Wellcome Trust Research Programme                                                  | Schnabel,K.C., Walsh,E.E. and Caserta,M.                                                                                                                                                                                                                   |
| EPI_ISL_2584849                                                                                                                                                                                                                                                                                                                                                                                                        | J. Craig Venter Institute                                                                | J. Craig Venter Institute                                                                | Agoti,C.N., Otieno,J.R., Munywoki,P.K., Mwhuri,A.G., Cane,P.A., Nokes,D.J., Kellam,P. and Cotten,M.L.                                                                                                                                                      |
| EPI_ISL_2584850                                                                                                                                                                                                                                                                                                                                                                                                        | J. Craig Venter Institute                                                                | J. Craig Venter Institute                                                                | Wentworth,D.E., Halpin,R.A., Bera,J., Lin,X., Fedorova,N., Tsitrin,T., McLellan,M., Stockwell,T., Amedeo,P., Bishop,B., Gupta,N., Hoover,J., Katzel,D., Schobel,S., Shrivastava,S., Garcia,J., Laguna-Torres,V.A., Leguia,M., Benavides,J.G. and Halsey,E. |
| EPI_ISL_2584852                                                                                                                                                                                                                                                                                                                                                                                                        | Medical Microbiology, University Medical Center Utrecht                                  | Medical Microbiology, University Medical Center Utrecht                                  | Das,S.R., Halpin,R.A., Puri,V., Akopov,A., Fedorova,N., Tsitrin,T., Stockwell,T., Amedeo,P., Bishop,B., Gupta,N., Hoover,J., Katzel,D., Schobel,S., Shrivastava,S., Wentworth,D.E. and Caserta,M.                                                          |
| EPI_ISL_2584853                                                                                                                                                                                                                                                                                                                                                                                                        | J. Craig Venter Institute                                                                | J. Craig Venter Institute                                                                | Tan,L., Viveen,M.C., Lemey,P. and Coenjaerts,F.E.                                                                                                                                                                                                          |
| EPI_ISL_2584855                                                                                                                                                                                                                                                                                                                                                                                                        | J. Craig Venter Institute                                                                | J. Craig Venter Institute                                                                | Shabman,R., Das,S.R., Shilts,M., Fedorova,N., Puri,V., Shrivastava,S., Amedeo,P., Williams,M., Barratt,K., Mitchell,J. and Jennings,L.                                                                                                                     |
| EPI_ISL_2584856                                                                                                                                                                                                                                                                                                                                                                                                        | Epidemiology and Demography, KEMRI-Wellcome Trust                                        | Epidemiology and Demography, KEMRI-Wellcome Trust                                        | Das,S., Halpin,R.A., Bera,J., Puri,V., Fedorova,N., Tsitrin,T., Stockwell,T., Amedeo,P., Bishop,B., Katzel,D., Schobel,S., Shrivastava,S., Hartert,T., Moore,M., Chappell,J., Larkin,E., Wentworth,D.E. and Anderson,L.J.                                  |
| EPI_ISL_2584859                                                                                                                                                                                                                                                                                                                                                                                                        | KEMRI Wellcome Trust Research Programme                                                  | KEMRI Wellcome Trust Research Programme                                                  | Kamau,E., Otieno,J.R., Murunga,N., Nyiro,J.U., Oketch,J.W., Ngoi,J.M., de Laurent,Z.R., Mwema,A., Agoti,C.N. and Nokes,D.J.                                                                                                                                |
| EPI_ISL_2584860                                                                                                                                                                                                                                                                                                                                                                                                        | J. Craig Venter Institute                                                                | J. Craig Venter Institute                                                                | Agoti,C.N., Otieno,J.R., Munywoki,P.K., Mwhuri,A.G., Cane,P.A., Nokes,D.J., Kellam,P. and Cotten,M.L.                                                                                                                                                      |
| EPI_ISL_2584861                                                                                                                                                                                                                                                                                                                                                                                                        | J. Craig Venter Institute                                                                | J. Craig Venter Institute                                                                | Shabman,R., Das,S.R., Shilts,M., Fedorova,N., Puri,V., Shrivastava,S., Amedeo,P., Williams,M., Barratt,K., Mitchell,J. and Jennings,L.                                                                                                                     |
| EPI_ISL_2584862                                                                                                                                                                                                                                                                                                                                                                                                        | Michiko Okamoto Tohoku University Graduate School of Medicine, Virology                  | Michiko Okamoto Tohoku University Graduate School of Medicine, Virology                  | Wentworth,D.E., Halpin,R.A., Bera,J., Lin,X., Fedorova,N., Tsitrin,T., McLellan,M., Stockwell,T., Amedeo,P., Bishop,B., Gupta,N., Hoover,J., Katzel,D., Schobel,S., Shrivastava,S., Garcia,J., Laguna-Torres,V.A., Leguia,M., Benavides,J.G. and Halsey,E. |
| EPI_ISL_2584863                                                                                                                                                                                                                                                                                                                                                                                                        | J. Craig Venter Institute                                                                | J. Craig Venter Institute                                                                | Okamoto,M., Malasaor,R. and Oshitani,H.                                                                                                                                                                                                                    |
| EPI_ISL_2584865                                                                                                                                                                                                                                                                                                                                                                                                        | J. Craig Venter Institute                                                                | J. Craig Venter Institute                                                                | Das,S.R., Halpin,R.A., Shilts,M., Puri,V., Akopov,A., Fedorova,N., Stockwell,T., Amedeo,P., Bishop,B., Katzel,D., Schobel,S., Shrivastava,S. and Hartert,T.                                                                                                |
| EPI_ISL_2584866, EPI_ISL_2584867, EPI_ISL_2584868, EPI_ISL_2584869, EPI_ISL_2584871, EPI_ISL_2584872                                                                                                                                                                                                                                                                                                                   | Epidemiology and Demography, KEMRI-Wellcome Trust                                        | Epidemiology and Demography, KEMRI-Wellcome Trust                                        | Shabman,R., Das,S.R., Puri,V., Fedorova,N., Amedeo,P., Williams,M., Shrivastava,S. and Halasa,N.                                                                                                                                                           |
| EPI_ISL_2584873, EPI_ISL_2584874, EPI_ISL_2584875                                                                                                                                                                                                                                                                                                                                                                      | J. Craig Venter Institute                                                                | J. Craig Venter Institute                                                                | Kamau,E., Otieno,J.R., Murunga,N., Nyiro,J.U., Oketch,J.W., Ngoi,J.M., de Laurent,Z.R., Mwema,A., Agoti,C.N. and Nokes,D.J.                                                                                                                                |
| EPI_ISL_2584879                                                                                                                                                                                                                                                                                                                                                                                                        | J. Craig Venter Institute                                                                | J. Craig Venter Institute                                                                | Wentworth,D.E., Halpin,R.A., Bera,J., Lin,X., Fedorova,N., Tsitrin,T., McLellan,M., Stockwell,T., Amedeo,P., Bishop,B., Gupta,N., Hoover,J., Katzel,D., Schobel,S., Shrivastava,S., Garcia,J., Laguna-Torres,V.A., Leguia,M., Benavides,J.G. and Halsey,E. |
| EPI_ISL_2584880                                                                                                                                                                                                                                                                                                                                                                                                        | J. Craig Venter Institute                                                                | J. Craig Venter Institute                                                                | Das,S., Halpin,R.A., Bera,J., Puri,V., Fedorova,N., Tsitrin,T., Stockwell,T., Amedeo,P., Bishop,B., Katzel,D., Schobel,S., Shrivastava,S., Hartert,T., Moore,M., Chappell,J., Larkin,E., Wentworth,D.E. and Anderson,L.J.                                  |
| EPI_ISL_2584881, EPI_ISL_2584882, EPI_ISL_2584883, EPI_ISL_2584884, EPI_ISL_2584885, EPI_ISL_2584886, EPI_ISL_2584887, EPI_ISL_2584888, EPI_ISL_2584889                                                                                                                                                                                                                                                                | Epidemiology and Demography, KEMRI-Wellcome Trust                                        | Epidemiology and Demography, KEMRI-Wellcome Trust                                        | Das,S.R., Halpin,R.A., Shilts,M., Puri,V., Akopov,A., Fedorova,N., Stockwell,T., Amedeo,P., Bishop,B., Katzel,D., Schobel,S., Shrivastava,S. and Hartert,T.                                                                                                |
| EPI_ISL_2584890                                                                                                                                                                                                                                                                                                                                                                                                        | Medical Microbiology, University Medical Center Utrecht                                  | Medical Microbiology, University Medical Center Utrecht                                  | Kamau,E., Otieno,J.R., Murunga,N., Nyiro,J.U., Oketch,J.W., Ngoi,J.M., de Laurent,Z.R., Mwema,A., Agoti,C.N. and Nokes,D.J.                                                                                                                                |
| EPI_ISL_2584891, EPI_ISL_2584893                                                                                                                                                                                                                                                                                                                                                                                       | J. Craig Venter Institute                                                                | J. Craig Venter Institute                                                                | Tan,L., Lemey,P., Viveen,M. and Coenjaerts,F.E.J.                                                                                                                                                                                                          |
| EPI_ISL_2584894                                                                                                                                                                                                                                                                                                                                                                                                        | J. Craig Venter Institute                                                                | J. Craig Venter Institute                                                                | Shabman,R., Das,S.R., Shilts,M., Fedorova,N., Puri,V., Shrivastava,S., Amedeo,P., Williams,M., Barratt,K., Mitchell,J. and Jennings,L.                                                                                                                     |
| EPI_ISL_2584896                                                                                                                                                                                                                                                                                                                                                                                                        | Medicine, University of Washington, 300 9th Ave, Harborview Research & Training Building | Medicine, University of Washington, 300 9th Ave, Harborview Research & Training Building | Wentworth,D.E., Halpin,R.A., Bera,J., Lin,X., Fedorova,N., Tsitrin,T., McLellan,M., Stockwell,T., Amedeo,P., Bishop,B., Gupta,N., Hoover,J., Katzel,D., Schobel,S., Shrivastava,S., Garcia,J., Laguna-Torres,V.A., Leguia,M., Benavides,J.G. and Halsey,E. |
| EPI_ISL_2584897                                                                                                                                                                                                                                                                                                                                                                                                        | J. Craig Venter Institute                                                                | J. Craig Venter Institute                                                                | Chu,H., Scott,E. and Roychoudhury,P.                                                                                                                                                                                                                       |
| EPI_ISL_2584898, EPI_ISL_2584899, EPI_ISL_2584901, EPI_ISL_2584902, EPI_ISL_2584904, EPI_ISL_2584905, EPI_ISL_2584906, EPI_ISL_2584907, EPI_ISL_2584909                                                                                                                                                                                                                                                                | J. Craig Venter Institute                                                                | J. Craig Venter Institute                                                                | Das,S., Halpin,R.A., Bera,J., Fedorova,N., Tsitrin,T., Stockwell,T., Amedeo,P., Bishop,B., Gupta,N., Hoover,J., Katzel,D., Schobel,S., Shrivastava,S., Hartert,T., Moore,M., Chappell,J., Larkin,E., Wentworth,D.E. and Anderson,L.J.                      |
| EPI_ISL_2584912, EPI_ISL_2584913, EPI_ISL_2584914, EPI_ISL_2584915, EPI_ISL_2584916, EPI_ISL_2584917, EPI_ISL_2584918, EPI_ISL_2584919, EPI_ISL_2584920, EPI_ISL_2584921, EPI_ISL_2584922, EPI_ISL_2584923, EPI_ISL_2584924, EPI_ISL_2584925, EPI_ISL_2584926, EPI_ISL_2584927, EPI_ISL_2584928, EPI_ISL_2584929, EPI_ISL_2584930, EPI_ISL_2584931, EPI_ISL_2584932, EPI_ISL_2584933, EPI_ISL_2584934, EPI_ISL_2584935 | Epidemiology and Demography, KEMRI-Wellcome Trust                                        | Epidemiology and Demography, KEMRI-Wellcome Trust                                        | Das,S.R., Halpin,R.A., Shilts,M., Puri,V., Akopov,A., Fedorova,N., Stockwell,T., Amedeo,P., Bishop,B., Katzel,D., Schobel,S., Shrivastava,S. and Hartert,T.                                                                                                |
| see above                                                                                                                                                                                                                                                                                                                                                                                                              | Epidemiology and Demography, KEMRI-Wellcome Trust                                        | Epidemiology and Demography, KEMRI-Wellcome Trust                                        | Kamau,E., Otieno,J.R., Murunga,N., Nyiro,J.U., Oketch,J.W., Ngoi,J.M., de Laurent,Z.R., Mwema,A., Agoti,C.N. and Nokes,D.J.                                                                                                                                |
| EPI_ISL_2584937                                                                                                                                                                                                                                                                                                                                                                                                        | Medical Microbiology, University Medical Center Utrecht                                  | Medical Microbiology, University Medical Center Utrecht                                  | Tan,L., Viveen,M.C., Lemey,P. and Coenjaerts,F.E.                                                                                                                                                                                                          |
| EPI_ISL_2584938, EPI_ISL_2584939, EPI_ISL_2584940                                                                                                                                                                                                                                                                                                                                                                      | J. Craig Venter Institute                                                                | J. Craig Venter Institute                                                                | Shabman,R., Das,S.R., Shilts,M., Fedorova,N., Puri,V., Shrivastava,S., Amedeo,P., Williams,M., Barratt,K., Mitchell,J. and Jennings,L.                                                                                                                     |
| EPI_ISL_2584941                                                                                                                                                                                                                                                                                                                                                                                                        | Medicine, University of Washington, 300 9th Ave, Harborview Research & Training Building | Medicine, University of Washington, 300 9th Ave, Harborview Research & Training Building | Chu,H., Scott,E. and Roychoudhury,P.                                                                                                                                                                                                                       |
| EPI_ISL_2584944, EPI_ISL_2584945, EPI_ISL_2584946, EPI_ISL_2584947, EPI_ISL_2584948, EPI_ISL_2584950, EPI_ISL_2584952, EPI_ISL_2584953                                                                                                                                                                                                                                                                                 | J. Craig Venter Institute                                                                | J. Craig Venter Institute                                                                | Das,S.R., Halpin,R.A., Shilts,M., Puri,V., Akopov,A., Fedorova,N., Stockwell,T., Amedeo,P., Bishop,B., Katzel,D., Schobel,S., Shrivastava,S. and Hartert,T.                                                                                                |
| EPI_ISL_2584955, EPI_ISL_2584956, EPI_ISL_2584958, EPI_ISL_2584959, EPI_ISL_2584960, EPI_ISL_2584961, EPI_ISL_2584963, EPI_ISL_2584964, EPI_ISL_2584965, EPI_ISL_2584967, EPI_ISL_2584968, EPI_ISL_2584969, EPI_ISL_2584970, EPI_ISL_2584972, EPI_ISL_2584973, EPI_ISL_2584975, EPI_ISL_2584976, EPI_ISL_2584977, EPI_ISL_2584978, EPI_ISL_2584980, EPI_ISL_2584981, EPI_ISL_2584982, EPI_ISL_2584983, EPI_ISL_2584985 | Epidemiology and Demography, KEMRI-Wellcome Trust                                        | Epidemiology and Demography, KEMRI-Wellcome Trust                                        | Kamau,E., Otieno,J.R., Murunga,N., Nyiro,J.U., Oketch,J.W., Ngoi,J.M., de Laurent,Z.R., Mwema,A., Agoti,C.N. and Nokes,D.J.                                                                                                                                |
| see above                                                                                                                                                                                                                                                                                                                                                                                                              | Epidemiology and Demography, KEMRI-Wellcome Trust                                        | Epidemiology and Demography, KEMRI-Wellcome Trust                                        | Tan,L., Viveen,M.C., Lemey,P. and Coenjaerts,F.E.                                                                                                                                                                                                          |
| EPI_ISL_2584986, EPI_ISL_2584987                                                                                                                                                                                                                                                                                                                                                                                       | Medical Microbiology, University Medical Center Utrecht                                  | Medical Microbiology, University Medical Center Utrecht                                  | Shabman,R., Das,S.R., Shilts,M., Fedorova,N., Puri,V., Shrivastava,S., Amedeo,P., Williams,M., Barratt,K., Mitchell,J. and Jennings,L.                                                                                                                     |
| EPI_ISL_2584988, EPI_ISL_2584989, EPI_ISL_2584990, EPI_ISL_2584991                                                                                                                                                                                                                                                                                                                                                     | J. Craig Venter Institute                                                                | J. Craig Venter Institute                                                                | Wentworth,D.E., Halpin,R.A., Bera,J., Lin,X., Fedorova,N., Tsitrin,T., McLellan,M., Stockwell,T., Amedeo,P., Bishop,B., Gupta,N., Hoover,J., Katzel,D., Schobel,S., Shrivastava,S., Garcia,J., Laguna-Torres,V.A., Leguia,M., Benavides,J.G. and Halsey,E. |
| EPI_ISL_2584992, EPI_ISL_2584993                                                                                                                                                                                                                                                                                                                                                                                       | J. Craig Venter Institute                                                                | J. Craig Venter Institute                                                                | Yun,M.-R., Lee,W.-J., Kim,A.-R., Lee,H.S., Kim,K., Kim,S.S., Kim,Y.-J. and Kim,D.-W.                                                                                                                                                                       |
| EPI_ISL_2584994                                                                                                                                                                                                                                                                                                                                                                                                        | Division of Biosafety Evaluation and Control, Korea National Institute of Health         | Division of Biosafety Evaluation and Control, Korea National Institute of Health         |                                                                                                                                                                                                                                                            |
| EPI_ISL_2584995, EPI_ISL_2584996, EPI_ISL_2584997, EPI_ISL_2584998, EPI_ISL_2584999, EPI_ISL_2585000, EPI_ISL_2585001, EPI_ISL_2585002, EPI_ISL_2585003, EPI_ISL_2585004, EPI_ISL_2585005, EPI_ISL_2585006, EPI_ISL_2585007, EPI_ISL_2585009, EPI_ISL_2585010, EPI_ISL_2585012, EPI_ISL_2585013, EPI_ISL_2585014, EPI_ISL_2585015                                                                                      |                                                                                          |                                                                                          |                                                                                                                                                                                                                                                            |

|                                                                                                                                                                                                                                                                                                                                                                                                                                                                                                                                                                                                                                                                                                        |                                                                                          |                                                                                          |                                                                                                                                                                                                                                                                                                                                                                                  |
|--------------------------------------------------------------------------------------------------------------------------------------------------------------------------------------------------------------------------------------------------------------------------------------------------------------------------------------------------------------------------------------------------------------------------------------------------------------------------------------------------------------------------------------------------------------------------------------------------------------------------------------------------------------------------------------------------------|------------------------------------------------------------------------------------------|------------------------------------------------------------------------------------------|----------------------------------------------------------------------------------------------------------------------------------------------------------------------------------------------------------------------------------------------------------------------------------------------------------------------------------------------------------------------------------|
| see above                                                                                                                                                                                                                                                                                                                                                                                                                                                                                                                                                                                                                                                                                              | J. Craig Venter Institute                                                                | J. Craig Venter Institute                                                                | Das,S.R., Halpin,R.A., Shilts,M., Puri,V., Akopov,A., Fedorova,N., Stockwell,T., Amedeo,P., Bishop,B., Katzel,D., Schobel,S., Shrivastava,S. and Hartert,T.                                                                                                                                                                                                                      |
| EPI_ISL_2585016                                                                                                                                                                                                                                                                                                                                                                                                                                                                                                                                                                                                                                                                                        | J. Craig Venter Institute                                                                | J. Craig Venter Institute                                                                | Shabman,R., Das,S.R., Puri,V., Fedorova,N., Amedeo,P., Williams,M., Shrivastava,S. and Halasa,N.                                                                                                                                                                                                                                                                                 |
| EPI_ISL_2585017, EPI_ISL_2585018, EPI_ISL_2585019, EPI_ISL_2585020, EPI_ISL_2585021, EPI_ISL_2585022, EPI_ISL_2585023, EPI_ISL_2585025, EPI_ISL_2585026, EPI_ISL_2585027, EPI_ISL_2585028, EPI_ISL_2585029, EPI_ISL_2585031, EPI_ISL_2585032, EPI_ISL_2585033, EPI_ISL_2585036, EPI_ISL_2585037, EPI_ISL_2585039, EPI_ISL_2585040, EPI_ISL_2585041, EPI_ISL_2585042, EPI_ISL_2585043, EPI_ISL_2585044, EPI_ISL_2585045, EPI_ISL_2585047, EPI_ISL_2585049, EPI_ISL_2585050, EPI_ISL_2585051, EPI_ISL_2585052, EPI_ISL_2585053, EPI_ISL_2585054, EPI_ISL_2585056, EPI_ISL_2585057, EPI_ISL_2585058, EPI_ISL_2585059, EPI_ISL_2585060, EPI_ISL_2585061                                                    |                                                                                          |                                                                                          |                                                                                                                                                                                                                                                                                                                                                                                  |
| see above                                                                                                                                                                                                                                                                                                                                                                                                                                                                                                                                                                                                                                                                                              | Epidemiology and Demography, KEMRI-Wellcome Trust                                        | Epidemiology and Demography, KEMRI-Wellcome Trust                                        | Kamau,E., Otieno,J.R., Murunga,N., Nyiro,J.U., Oketch,J.W., Ngoi,J.M., de Laurent,Z.R., Mwema,A., Agoti,C.N. and Nokes,D.J.                                                                                                                                                                                                                                                      |
| EPI_ISL_2585063                                                                                                                                                                                                                                                                                                                                                                                                                                                                                                                                                                                                                                                                                        | Medical Microbiology, University Medical Center Utrecht                                  | Medical Microbiology, University Medical Center Utrecht                                  | Tan,L., Viveen,M.C., Lemey,P. and Coenjaerts,F.E.                                                                                                                                                                                                                                                                                                                                |
| EPI_ISL_2585064, EPI_ISL_2585065, EPI_ISL_2585066, EPI_ISL_2585067, EPI_ISL_2585068, EPI_ISL_2585070, EPI_ISL_2585072                                                                                                                                                                                                                                                                                                                                                                                                                                                                                                                                                                                  | J. Craig Venter Institute                                                                | J. Craig Venter Institute                                                                | Shabman,R., Das,S.R., Shilts,M., Fedorova,N., Puri,V., Shrivastava,S., Amedeo,P., Williams,M., Barratt,K., Mitchell,J. and Jennings,L.                                                                                                                                                                                                                                           |
| EPI_ISL_2585074                                                                                                                                                                                                                                                                                                                                                                                                                                                                                                                                                                                                                                                                                        | J. Craig Venter Institute                                                                | J. Craig Venter Institute                                                                | Lorenzi,H., Town,C., Halpin,R., Bera,J., Ransier,A., Fedorova,N., Stockwell,T., Amedeo,P., Appalla,L., Bishop,B., Edworthy,P., Gupta,N., Hoover,J., Katzel,D., Li,K., Schobel,S., Shrivastava,S., Thovarai,V., Wang,S., Rebuffo-Scheer,C., Fan,J., He,J., Kehi,S.C., Lederboer,N., Jurgens,L.A., Bose,M.E., Beck,E.T., Kumar,S., Wentworth,D.E. and Henrickson,K.J.              |
| EPI_ISL_2585075                                                                                                                                                                                                                                                                                                                                                                                                                                                                                                                                                                                                                                                                                        | J. Craig Venter Institute                                                                | J. Craig Venter Institute                                                                | Das,S.R., Halpin,R.A., Shilts,M., Puri,V., Akopov,A., Fedorova,N., Stockwell,T., Amedeo,P., Bishop,B., Katzel,D., Schobel,S., Shrivastava,S. and Hartert,T.                                                                                                                                                                                                                      |
| EPI_ISL_2585077                                                                                                                                                                                                                                                                                                                                                                                                                                                                                                                                                                                                                                                                                        | J. Craig Venter Institute                                                                | J. Craig Venter Institute                                                                | Shabman,R., Das,S.R., Shilts,M., Fedorova,N., Puri,V., Shrivastava,S., Amedeo,P., Hu,L., Durbin,A., Rocchi,I., Williams,T. and Hartert,T.                                                                                                                                                                                                                                        |
| EPI_ISL_2585078, EPI_ISL_2585079, EPI_ISL_2585080, EPI_ISL_2585081, EPI_ISL_2585082, EPI_ISL_2585083, EPI_ISL_2585084, EPI_ISL_2585085, EPI_ISL_2585086, EPI_ISL_2585087, EPI_ISL_2585091, EPI_ISL_2585093, EPI_ISL_2585094                                                                                                                                                                                                                                                                                                                                                                                                                                                                            |                                                                                          |                                                                                          |                                                                                                                                                                                                                                                                                                                                                                                  |
| see above                                                                                                                                                                                                                                                                                                                                                                                                                                                                                                                                                                                                                                                                                              | J. Craig Venter Institute                                                                | J. Craig Venter Institute                                                                | Das,S.R., Halpin,R.A., Shilts,M., Puri,V., Akopov,A., Fedorova,N., Stockwell,T., Amedeo,P., Bishop,B., Katzel,D., Schobel,S., Shrivastava,S. and Hartert,T.                                                                                                                                                                                                                      |
| EPI_ISL_2585095                                                                                                                                                                                                                                                                                                                                                                                                                                                                                                                                                                                                                                                                                        | J. Craig Venter Institute                                                                | J. Craig Venter Institute                                                                | Shabman,R., Das,S.R., Puri,V., Fedorova,N., Amedeo,P., Williams,M., Shrivastava,S. and Halasa,N.                                                                                                                                                                                                                                                                                 |
| EPI_ISL_2585096, EPI_ISL_2585098, EPI_ISL_2585099, EPI_ISL_2585100, EPI_ISL_2585101, EPI_ISL_2585102, EPI_ISL_2585103, EPI_ISL_2585104, EPI_ISL_2585105, EPI_ISL_2585106, EPI_ISL_2585107, EPI_ISL_2585108, EPI_ISL_2585110, EPI_ISL_2585111, EPI_ISL_2585112, EPI_ISL_2585113, EPI_ISL_2585114, EPI_ISL_2585115, EPI_ISL_2585116, EPI_ISL_2585117, EPI_ISL_2585118, EPI_ISL_2585119, EPI_ISL_2585120, EPI_ISL_2585121, EPI_ISL_2585123, EPI_ISL_2585124, EPI_ISL_2585125, EPI_ISL_2585126, EPI_ISL_2585127, EPI_ISL_2585128, EPI_ISL_2585130, EPI_ISL_2585131, EPI_ISL_2585132, EPI_ISL_2585133, EPI_ISL_2585134, EPI_ISL_2585135, EPI_ISL_2585136, EPI_ISL_2585137, EPI_ISL_2585139, EPI_ISL_2585140 |                                                                                          |                                                                                          |                                                                                                                                                                                                                                                                                                                                                                                  |
| see above                                                                                                                                                                                                                                                                                                                                                                                                                                                                                                                                                                                                                                                                                              | Epidemiology and Demography, KEMRI-Wellcome Trust                                        | Epidemiology and Demography, KEMRI-Wellcome Trust                                        | Kamau,E., Otieno,J.R., Murunga,N., Nyiro,J.U., Oketch,J.W., Ngoi,J.M., de Laurent,Z.R., Mwema,A., Agoti,C.N. and Nokes,D.J.                                                                                                                                                                                                                                                      |
| EPI_ISL_2585142                                                                                                                                                                                                                                                                                                                                                                                                                                                                                                                                                                                                                                                                                        | Medical Microbiology, University Medical Center Utrecht                                  | Medical Microbiology, University Medical Center Utrecht                                  | Tan,L., Viveen,M.C., Lemey,P. and Coenjaerts,F.E.                                                                                                                                                                                                                                                                                                                                |
| EPI_ISL_2585143                                                                                                                                                                                                                                                                                                                                                                                                                                                                                                                                                                                                                                                                                        | J. Craig Venter Institute                                                                | J. Craig Venter Institute                                                                | Shabman,R., Das,S.R., Shilts,M., Fedorova,N., Puri,V., Shrivastava,S., Amedeo,P., Williams,M., Barratt,K., Mitchell,J. and Jennings,L.                                                                                                                                                                                                                                           |
| EPI_ISL_2585144                                                                                                                                                                                                                                                                                                                                                                                                                                                                                                                                                                                                                                                                                        | J. Craig Venter Institute                                                                | J. Craig Venter Institute                                                                | Wentworth,D.E., Halpin,R.A., Bera,J., Lin,X., Fedorova,N., Tsitrin,T., McLellan,M., Stockwell,T., Amedeo,P., Bishop,B., Gupta,N., Hoover,J., Katzel,D., Schobel,S., Shrivastava,S., Garcia,J., Laguna-Torres,V.A., Leguia,M., Benavides,J.G. and Halsey,E.                                                                                                                       |
| EPI_ISL_2585146                                                                                                                                                                                                                                                                                                                                                                                                                                                                                                                                                                                                                                                                                        | Taylor G.S., Virology laboratory, Bristol Public Health Laboratory                       | Taylor G.S., Virology laboratory, Bristol Public Health Laboratory                       | Taylor,G.S.                                                                                                                                                                                                                                                                                                                                                                      |
| EPI_ISL_2585147, EPI_ISL_2585148                                                                                                                                                                                                                                                                                                                                                                                                                                                                                                                                                                                                                                                                       | Medicine, University of Washington, 300 9th Ave, Harborview Research & Training Building | Medicine, University of Washington, 300 9th Ave, Harborview Research & Training Building | Chu,H., Scott,E. and Roychoudhury,P.                                                                                                                                                                                                                                                                                                                                             |
| EPI_ISL_2585149, EPI_ISL_2585150                                                                                                                                                                                                                                                                                                                                                                                                                                                                                                                                                                                                                                                                       | J. Craig Venter Institute                                                                | J. Craig Venter Institute                                                                | Das,S.R., Halpin,R.A., Shilts,M., Puri,V., Akopov,A., Fedorova,N., Stockwell,T., Amedeo,P., Bishop,B., Katzel,D., Schobel,S., Shrivastava,S. and Hartert,T.                                                                                                                                                                                                                      |
| EPI_ISL_2585153, EPI_ISL_2585154, EPI_ISL_2585155                                                                                                                                                                                                                                                                                                                                                                                                                                                                                                                                                                                                                                                      | J. Craig Venter Institute                                                                | J. Craig Venter Institute                                                                | Shabman,R., Das,S.R., Puri,V., Fedorova,N., Amedeo,P., Williams,M., Shrivastava,S. and Halasa,N.                                                                                                                                                                                                                                                                                 |
| EPI_ISL_2585156, EPI_ISL_2585157, EPI_ISL_2585158, EPI_ISL_2585160, EPI_ISL_2585161, EPI_ISL_2585162, EPI_ISL_2585163, EPI_ISL_2585164, EPI_ISL_2585165, EPI_ISL_2585167, EPI_ISL_2585168, EPI_ISL_2585169, EPI_ISL_2585171, EPI_ISL_2585172, EPI_ISL_2585173, EPI_ISL_2585174, EPI_ISL_2585175, EPI_ISL_2585176, EPI_ISL_2585177, EPI_ISL_2585178, EPI_ISL_2585179, EPI_ISL_2585180, EPI_ISL_2585181, EPI_ISL_2585182, EPI_ISL_2585183, EPI_ISL_2585184, EPI_ISL_2585185, EPI_ISL_2585186, EPI_ISL_2585187, EPI_ISL_2585188                                                                                                                                                                           |                                                                                          |                                                                                          |                                                                                                                                                                                                                                                                                                                                                                                  |
| see above                                                                                                                                                                                                                                                                                                                                                                                                                                                                                                                                                                                                                                                                                              | Epidemiology and Demography, KEMRI-Wellcome Trust                                        | Epidemiology and Demography, KEMRI-Wellcome Trust                                        | Kamau,E., Otieno,J.R., Murunga,N., Nyiro,J.U., Oketch,J.W., Ngoi,J.M., de Laurent,Z.R., Mwema,A., Agoti,C.N. and Nokes,D.J.                                                                                                                                                                                                                                                      |
| EPI_ISL_2585189, EPI_ISL_2585190                                                                                                                                                                                                                                                                                                                                                                                                                                                                                                                                                                                                                                                                       | Medical Microbiology, University Medical Center Utrecht                                  | Medical Microbiology, University Medical Center Utrecht                                  | Tan,L., Viveen,M.C., Lemey,P. and Coenjaerts,F.E.                                                                                                                                                                                                                                                                                                                                |
| EPI_ISL_2585191, EPI_ISL_2585192, EPI_ISL_2585193, EPI_ISL_2585195                                                                                                                                                                                                                                                                                                                                                                                                                                                                                                                                                                                                                                     | J. Craig Venter Institute                                                                | J. Craig Venter Institute                                                                | Shabman,R., Das,S.R., Shilts,M., Fedorova,N., Puri,V., Shrivastava,S., Amedeo,P., Williams,M., Barratt,K., Mitchell,J. and Jennings,L.                                                                                                                                                                                                                                           |
| EPI_ISL_2585196                                                                                                                                                                                                                                                                                                                                                                                                                                                                                                                                                                                                                                                                                        | Medicine, University of Washington, 300 9th Ave, Harborview Research & Training Building | Medicine, University of Washington, 300 9th Ave, Harborview Research & Training Building | Chu,H., Scott,E. and Roychoudhury,P.                                                                                                                                                                                                                                                                                                                                             |
| EPI_ISL_2585199, EPI_ISL_2585200                                                                                                                                                                                                                                                                                                                                                                                                                                                                                                                                                                                                                                                                       | J. Craig Venter Institute                                                                | J. Craig Venter Institute                                                                | Das,S.R., Halpin,R.A., Shilts,M., Puri,V., Akopov,A., Fedorova,N., Stockwell,T., Amedeo,P., Bishop,B., Katzel,D., Schobel,S., Shrivastava,S. and Hartert,T.                                                                                                                                                                                                                      |
| EPI_ISL_2585205                                                                                                                                                                                                                                                                                                                                                                                                                                                                                                                                                                                                                                                                                        | J. Craig Venter Institute                                                                | J. Craig Venter Institute                                                                | Lorenzi,H., Town,C., Halpin,R., Bera,J., Ransier,A., Fedorova,N., Stockwell,T., Amedeo,P., Appalla,L., Bishop,B., Edworthy,P., Gupta,N., Hoover,J., Katzel,D., Li,K., Schobel,S., Shrivastava,S., Thovarai,V., Wang,S., Rebuffo-Scheer,C., Fan,J., He,J., Kehi,S.C., Lederboer,N., Jurgens,L.A., Bose,M.E., Beck,E.T., Kumar,S., Noyola,D.E., Wentworth,D.E. and Henrickson,K.J. |
| EPI_ISL_2585247                                                                                                                                                                                                                                                                                                                                                                                                                                                                                                                                                                                                                                                                                        | J. Craig Venter Institute                                                                | J. Craig Venter Institute                                                                | Das,S.R., Halpin,R.A., Puri,V., Akopov,A., Fedorova,N., Stockwell,T., Amedeo,P., Bishop,B., Katzel,D., Schobel,S., Shrivastava,S., Hall,C.B., Tesini,B.L., Schabel,K.C., Walsh,E.E. and Caserta,M.                                                                                                                                                                               |
| EPI_ISL_2585256, EPI_ISL_2585258                                                                                                                                                                                                                                                                                                                                                                                                                                                                                                                                                                                                                                                                       | J. Craig Venter Institute                                                                | J. Craig Venter Institute                                                                | Shabman,R., Das,S.R., Shilts,M., Fedorova,N., Puri,V., Shrivastava,S., Amedeo,P., Williams,M., Barratt,K., Mitchell,J. and Jennings,L.                                                                                                                                                                                                                                           |
| EPI_ISL_2585259                                                                                                                                                                                                                                                                                                                                                                                                                                                                                                                                                                                                                                                                                        | J. Craig Venter Institute                                                                | J. Craig Venter Institute                                                                | Das,S., Halpin,R.A., Bera,J., Puri,V., Fedorova,N., Tsitrin,T., Stockwell,T., Amedeo,P., Bishop,B., Katzel,D., Schobel,S., Shrivastava,S., Hartert,T., Moore,M., Chappell,J., Larkin,E., Wentworth,D.E. and Anderson,L.J.                                                                                                                                                        |
| EPI_ISL_2585260                                                                                                                                                                                                                                                                                                                                                                                                                                                                                                                                                                                                                                                                                        | J. Craig Venter Institute                                                                | J. Craig Venter Institute                                                                | Das,S.R., Halpin,R.A., Shilts,M., Puri,V., Akopov,A., Fedorova,N., Stockwell,T., Amedeo,P., Bishop,B., Katzel,D., Schobel,S., Shrivastava,S. and Hartert,T.                                                                                                                                                                                                                      |
| EPI_ISL_2585261                                                                                                                                                                                                                                                                                                                                                                                                                                                                                                                                                                                                                                                                                        | J. Craig Venter Institute                                                                | J. Craig Venter Institute                                                                | Shabman,R., Das,S.R., Shilts,M., Fedorova,N., Puri,V., Shrivastava,S., Amedeo,P., Williams,M., Barratt,K., Mitchell,J. and Jennings,L.                                                                                                                                                                                                                                           |
| EPI_ISL_2585265                                                                                                                                                                                                                                                                                                                                                                                                                                                                                                                                                                                                                                                                                        | J. Craig Venter Institute                                                                | J. Craig Venter Institute                                                                | Das,S.R., Halpin,R.A., Shilts,M., Puri,V., Akopov,A., Fedorova,N., Stockwell,T., Amedeo,P., Bishop,B., Katzel,D., Schobel,S., Shrivastava,S. and Hartert,T.                                                                                                                                                                                                                      |
| EPI_ISL_2585267, EPI_ISL_2585268, EPI_ISL_2585269, EPI_ISL_2585275, EPI_ISL_2585276, EPI_ISL_2585277, EPI_ISL_2585279                                                                                                                                                                                                                                                                                                                                                                                                                                                                                                                                                                                  | J. Craig Venter Institute                                                                | J. Craig Venter Institute                                                                | Shabman,R., Das,S.R., Shilts,M., Fedorova,N., Puri,V., Shrivastava,S., Amedeo,P., Williams,M., Barratt,K., Mitchell,J. and Jennings,L.                                                                                                                                                                                                                                           |
| EPI_ISL_2585280                                                                                                                                                                                                                                                                                                                                                                                                                                                                                                                                                                                                                                                                                        | J. Craig Venter Institute                                                                | J. Craig Venter Institute                                                                | Das,S., Halpin,R.A., Bera,J., Fedorova,N., Tsitrin,T., Stockwell,T., Amedeo,P., Bishop,B., Gupta,N., Hoover,J., Katzel,D., Schobel,S., Shrivastava,S., Hartert,T., Moore,M., Chappell,J., Larkin,E., Wentworth,D.E. and Anderson,L.J.                                                                                                                                            |
| EPI_ISL_2585281                                                                                                                                                                                                                                                                                                                                                                                                                                                                                                                                                                                                                                                                                        | J. Craig Venter Institute                                                                | J. Craig Venter Institute                                                                | Das,S.R., Halpin,R.A., Shilts,M., Puri,V., Akopov,A., Fedorova,N., Stockwell,T., Amedeo,P., Bishop,B., Katzel,D., Schobel,S., Shrivastava,S. and Hartert,T.                                                                                                                                                                                                                      |
| EPI_ISL_2585284                                                                                                                                                                                                                                                                                                                                                                                                                                                                                                                                                                                                                                                                                        | J. Craig Venter Institute                                                                | J. Craig Venter Institute                                                                | Shabman,R., Das,S.R., Puri,V., Fedorova,N., Amedeo,P., Williams,M., Shrivastava,S. and Halasa,N.                                                                                                                                                                                                                                                                                 |
| EPI_ISL_2585285                                                                                                                                                                                                                                                                                                                                                                                                                                                                                                                                                                                                                                                                                        | J. Craig Venter Institute                                                                | J. Craig Venter Institute                                                                | Das,S.R., Halpin,R.A., Shilts,M., Puri,V., Akopov,A., Fedorova,N., Stockwell,T., Amedeo,P., Bishop,B., Katzel,D., Schobel,S., Shrivastava,S. and Hartert,T.                                                                                                                                                                                                                      |
| EPI_ISL_2585286                                                                                                                                                                                                                                                                                                                                                                                                                                                                                                                                                                                                                                                                                        | J. Craig Venter Institute                                                                | J. Craig Venter Institute                                                                | Das,S., Halpin,R.A., Bera,J., Fedorova,N., Tsitrin,T., Stockwell,T., Amedeo,P., Bishop,B., Gupta,N., Hoover,J., Katzel,D., Schobel,S., Shrivastava,S., Hartert,T., Moore,M., Chappell,J., Larkin,E., Wentworth,D.E. and Anderson,L.J.                                                                                                                                            |
| EPI_ISL_2585288, EPI_ISL_2585290                                                                                                                                                                                                                                                                                                                                                                                                                                                                                                                                                                                                                                                                       | J. Craig Venter Institute                                                                | J. Craig Venter Institute                                                                | Das,S.R., Halpin,R.A., Shilts,M., Puri,V., Akopov,A., Fedorova,N., Stockwell,T., Amedeo,P., Bishop,B., Katzel,D., Schobel,S., Shrivastava,S. and Hartert,T.                                                                                                                                                                                                                      |
| EPI_ISL_2585291                                                                                                                                                                                                                                                                                                                                                                                                                                                                                                                                                                                                                                                                                        | J. Craig Venter Institute                                                                | J. Craig Venter Institute                                                                | Shabman,R., Das,S.R., Shilts,M., Fedorova,N., Puri,V., Shrivastava,S., Amedeo,P., Williams,M., Barratt,K., Mitchell,J. and Jennings,L.                                                                                                                                                                                                                                           |



|                                                                                                                                                                                                                             |                                                                                                                                             |                                                                                                                                             |                                                                                                                                                                                                                                                                                                                                                                                   |
|-----------------------------------------------------------------------------------------------------------------------------------------------------------------------------------------------------------------------------|---------------------------------------------------------------------------------------------------------------------------------------------|---------------------------------------------------------------------------------------------------------------------------------------------|-----------------------------------------------------------------------------------------------------------------------------------------------------------------------------------------------------------------------------------------------------------------------------------------------------------------------------------------------------------------------------------|
| EPI_ISL_2588349, EPI_ISL_2588350, EPI_ISL_2588351                                                                                                                                                                           | J. Craig Venter Institute                                                                                                                   | J. Craig Venter Institute                                                                                                                   | Das,S., Halpin,R.A., Bera,J., Fedorova,N., Tsitrin,T., Stockwell,T., Amedeo,P., Bishop,B., Gupta,N., Hoover,J., Katzel,D., Schobel,S., Shrivastava,S., Hartert,T., Moore,M., Chappell,J., Larkin,E., Wentworth,D.E. and Anderson,L.J.                                                                                                                                             |
| EPI_ISL_2588352                                                                                                                                                                                                             | J. Craig Venter Institute                                                                                                                   | J. Craig Venter Institute                                                                                                                   | Das,S., Halpin,R.A., Bera,J., Puri,V., Fedorova,N., Tsitrin,T., Stockwell,T., Amedeo,P., Bishop,B., Katzel,D., Schobel,S., Shrivastava,S., Hartert,T., Moore,M., Chappell,J., Larkin,E., Wentworth,D.E. and Anderson,L.J.                                                                                                                                                         |
| EPI_ISL_2588353, EPI_ISL_2588354, EPI_ISL_2588355                                                                                                                                                                           | J. Craig Venter Institute                                                                                                                   | J. Craig Venter Institute                                                                                                                   | Das,S.R., Halpin,R.A., Shilts,M., Puri,V., Akopov,A., Fedorova,N., Stockwell,T., Amedeo,P., Bishop,B., Katzel,D., Schobel,S., Shrivastava,S. and Hartert,T.                                                                                                                                                                                                                       |
| EPI_ISL_2588356                                                                                                                                                                                                             | J. Craig Venter Institute                                                                                                                   | J. Craig Venter Institute                                                                                                                   | Shabman,R., Das,S.R., Shilts,M., Fedorova,N., Puri,V., Shrivastava,S., Amedeo,P., Williams,M., Barratt,K., Mitchell,J. and Jennings,L.                                                                                                                                                                                                                                            |
| EPI_ISL_2588357, EPI_ISL_2588358, EPI_ISL_2588359, EPI_ISL_2588360, EPI_ISL_2588361, EPI_ISL_2588362                                                                                                                        | J. Craig Venter Institute                                                                                                                   | J. Craig Venter Institute                                                                                                                   | Das,S., Halpin,R.A., Bera,J., Fedorova,N., Tsitrin,T., Stockwell,T., Amedeo,P., Bishop,B., Gupta,N., Hoover,J., Katzel,D., Schobel,S., Shrivastava,S., Hartert,T., Moore,M., Chappell,J., Larkin,E., Wentworth,D.E. and Anderson,L.J.                                                                                                                                             |
| EPI_ISL_2588363, EPI_ISL_2588364, EPI_ISL_2588365, EPI_ISL_2588366, EPI_ISL_2588367, EPI_ISL_2588368, EPI_ISL_2588369, EPI_ISL_2588370, EPI_ISL_2588371, EPI_ISL_2588372, EPI_ISL_2588373, EPI_ISL_2588374, EPI_ISL_2588375 | see above                                                                                                                                   | J. Craig Venter Institute                                                                                                                   | Das,S.R., Halpin,R.A., Shilts,M., Puri,V., Akopov,A., Fedorova,N., Stockwell,T., Amedeo,P., Bishop,B., Katzel,D., Schobel,S., Shrivastava,S. and Hartert,T.                                                                                                                                                                                                                       |
| EPI_ISL_2588376                                                                                                                                                                                                             | J. Craig Venter Institute                                                                                                                   | J. Craig Venter Institute                                                                                                                   | Shabman,R., Das,S.R., Puri,V., Fedorova,N., Amedeo,P., Williams,M., Shrivastava,S. and Halasa,N.                                                                                                                                                                                                                                                                                  |
| EPI_ISL_2588377, EPI_ISL_2588378                                                                                                                                                                                            | J. Craig Venter Institute                                                                                                                   | J. Craig Venter Institute                                                                                                                   | Das,S.R., Halpin,R.A., Shilts,M., Puri,V., Akopov,A., Fedorova,N., Stockwell,T., Amedeo,P., Bishop,B., Katzel,D., Schobel,S., Shrivastava,S. and Hartert,T.                                                                                                                                                                                                                       |
| EPI_ISL_2588379                                                                                                                                                                                                             | J. Craig Venter Institute                                                                                                                   | J. Craig Venter Institute                                                                                                                   | Wentworth,D.E., Halpin,R.A., Bera,J., Lin,X., Fedorova,N., Tsitrin,T., McLellan,M., Stockwell,T., Amedeo,P., Bishop,B., Gupta,N., Hoover,J., Katzel,D., Schobel,S., Shrivastava,S., Garcia,J., Laguna-Torres,V.A., Leguia,M., Benavides,J.G. and Halsey,E.                                                                                                                        |
| EPI_ISL_2588380                                                                                                                                                                                                             | J. Craig Venter Institute                                                                                                                   | J. Craig Venter Institute                                                                                                                   | Das,S.R., Halpin,R.A., Shilts,M., Puri,V., Akopov,A., Fedorova,N., Stockwell,T., Amedeo,P., Bishop,B., Katzel,D., Schobel,S., Shrivastava,S. and Hartert,T.                                                                                                                                                                                                                       |
| EPI_ISL_2588437                                                                                                                                                                                                             | J. Craig Venter Institute                                                                                                                   | J. Craig Venter Institute                                                                                                                   | Shabman,R., Das,S.R., Puri,V., Fedorova,N., Amedeo,P., Williams,M., Shrivastava,S. and Halasa,N.                                                                                                                                                                                                                                                                                  |
| EPI_ISL_2588597                                                                                                                                                                                                             | J. Craig Venter Institute                                                                                                                   | J. Craig Venter Institute                                                                                                                   | Das,S., Halpin,R.A., Bera,J., Fedorova,N., Tsitrin,T., Stockwell,T., Amedeo,P., Bishop,B., Gupta,N., Hoover,J., Katzel,D., Schobel,S., Shrivastava,S., Hartert,T., Moore,M., Chappell,J., Larkin,E., Wentworth,D.E. and Anderson,L.J.                                                                                                                                             |
| EPI_ISL_2588598, EPI_ISL_2588599, EPI_ISL_2588600                                                                                                                                                                           | J. Craig Venter Institute                                                                                                                   | J. Craig Venter Institute                                                                                                                   | Das,S.R., Halpin,R.A., Shilts,M., Puri,V., Akopov,A., Fedorova,N., Stockwell,T., Amedeo,P., Bishop,B., Katzel,D., Schobel,S., Shrivastava,S. and Hartert,T.                                                                                                                                                                                                                       |
| EPI_ISL_2588651                                                                                                                                                                                                             | Virology Laboratory, Dr. Ricardo Gutierrez Children Hospital                                                                                | Virology Laboratory, Dr. Ricardo Gutierrez Children Hospital                                                                                | Goya,S., Rojo,G.L., Valinotto,L.E., Mistchenko,A.S. and Viegas,M.                                                                                                                                                                                                                                                                                                                 |
| EPI_ISL_2588653                                                                                                                                                                                                             | J. Craig Venter Institute                                                                                                                   | J. Craig Venter Institute                                                                                                                   | Lorenzi,H., Town,C., Halpin,R., Bera,J., Ransier,A., Fedorova,N., Stockwell,T., Amedeo,P., Appalla,L., Bishop,B., Edworthy,P., Gupta,N., Hoover,J., Katzel,D., Li,K., Schobel,S., Shrivastava,S., Thovarai,V., Wang,S., Rebuffo-Scheer,C., Fan,J., He,J., Kehi,S.C., Lederboer,N., Jurgens,L.A., Bose,M.E., Beck,E.T., Kumar,S., Gerna,G., Wentworth,D.E. and Henrickson,K.J.     |
| EPI_ISL_2588654                                                                                                                                                                                                             | Virology Laboratory, Dr. Ricardo Gutierrez Children Hospital                                                                                | Virology Laboratory, Dr. Ricardo Gutierrez Children Hospital                                                                                | Goya,S., Valinotto,L.E., Tittarelli,E., Rojo,G.L., Greninger,A., Luso,S., Natale,M., Mistchenko,A.S. and Viegas,M.                                                                                                                                                                                                                                                                |
| EPI_ISL_2588655                                                                                                                                                                                                             | Virology Laboratory, Dr. Ricardo Gutierrez Children Hospital                                                                                | Virology Laboratory, Dr. Ricardo Gutierrez Children Hospital                                                                                | Goya,S., Rojo,G.L., Valinotto,L.E., Mistchenko,A.S. and Viegas,M.                                                                                                                                                                                                                                                                                                                 |
| EPI_ISL_2588656, EPI_ISL_2588657, EPI_ISL_2588658                                                                                                                                                                           | J. Craig Venter Institute                                                                                                                   | J. Craig Venter Institute                                                                                                                   | Lorenzi,H., Town,C., Halpin,R., Bera,J., Ransier,A., Fedorova,N., Stockwell,T., Amedeo,P., Appalla,L., Bishop,B., Edworthy,P., Gupta,N., Hoover,J., Katzel,D., Li,K., Schobel,S., Shrivastava,S., Thovarai,V., Wang,S., Rebuffo-Scheer,C., Fan,J., He,J., Kehi,S.C., Lederboer,N., Jurgens,L.A., Bose,M.E., Beck,E.T., Kumar,S., Gerna,G., Wentworth,D.E. and Henrickson,K.J.     |
| EPI_ISL_2588659                                                                                                                                                                                                             | Key Laboratory of Emergency Detection for Public Health of Zhejiang Province, Zhejiang Provincial Centre for Disease Control and Prevention | Key Laboratory of Emergency Detection for Public Health of Zhejiang Province, Zhejiang Provincial Centre for Disease Control and Prevention | Li,C.-X., Li,W., Zhou,J., Zhang,B., Feng,Y., Xu,C.-P., Lu,Y.-Y., Holmes,E.C. and Shi,M.                                                                                                                                                                                                                                                                                           |
| EPI_ISL_2588660                                                                                                                                                                                                             | Medical Microbiology, University Medical Center Utrecht                                                                                     | Medical Microbiology, University Medical Center Utrecht                                                                                     | Tan,L., Viveen,M.C., Lemey,P. and Coenjaerts,F.E.                                                                                                                                                                                                                                                                                                                                 |
| EPI_ISL_2588661                                                                                                                                                                                                             | J. Craig Venter Institute                                                                                                                   | J. Craig Venter Institute                                                                                                                   | Lorenzi,H., Town,C., Halpin,R., Bera,J., Ransier,A., Fedorova,N., Stockwell,T., Amedeo,P., Appalla,L., Bishop,B., Edworthy,P., Gupta,N., Hoover,J., Katzel,D., Schobel,S., Shrivastava,S., Thovarai,V., Wang,S., Rebuffo-Scheer,C., Fan,J., He,J., Kehi,S.C., Lederboer,N., Jurgens,L.A., Bose,M.E., Beck,E.T., Kumar,S., Gerna,G., Wentworth,D.E. and Henrickson,K.J.            |
| EPI_ISL_2588662                                                                                                                                                                                                             | Medical Microbiology, University Medical Center Utrecht                                                                                     | Medical Microbiology, University Medical Center Utrecht                                                                                     | Tan,L., Viveen,M.C., Lemey,P. and Coenjaerts,F.E.                                                                                                                                                                                                                                                                                                                                 |
| EPI_ISL_2588663                                                                                                                                                                                                             | Microbiology, Institute of Biological Sciences, Universeity of Sao Paulo                                                                    | Microbiology, Institute of Biological Sciences, Universeity of Sao Paulo                                                                    | Di Paola,N., Cunha,M.P., Oliveira,D.B.L., Durigon,E., Durigon,G.S. and Zanotto,P.M.A.                                                                                                                                                                                                                                                                                             |
| EPI_ISL_2588664                                                                                                                                                                                                             | Key Laboratory of Emergency Detection for Public Health of Zhejiang Province, Zhejiang Provincial Centre for Disease Control and Prevention | Key Laboratory of Emergency Detection for Public Health of Zhejiang Province, Zhejiang Provincial Centre for Disease Control and Prevention | Li,C.-X., Li,W., Zhou,J., Zhang,B., Feng,Y., Xu,C.-P., Lu,Y.-Y., Holmes,E.C. and Shi,M.                                                                                                                                                                                                                                                                                           |
| EPI_ISL_2588666                                                                                                                                                                                                             | Virology Laboratory, Dr. Ricardo Gutierrez Children Hospital                                                                                | Virology Laboratory, Dr. Ricardo Gutierrez Children Hospital                                                                                | Goya,S., Valinotto,L.E., Tittarelli,E., Rojo,G.L., Greninger,A., Luso,S., Natale,M., Mistchenko,A.S. and Viegas,M.                                                                                                                                                                                                                                                                |
| EPI_ISL_2588667                                                                                                                                                                                                             | Mami Nagashima Tokyo Metropolitan Institute of Public Health, Microbiology                                                                  | Mami Nagashima Tokyo Metropolitan Institute of Public Health, Microbiology                                                                  | Hasegawa,M., Okazaki,T., Sakamoto,T., Murata,R., Nagashima,M., Shinkai,T. and Sadamasu,K.                                                                                                                                                                                                                                                                                         |
| EPI_ISL_2588668                                                                                                                                                                                                             | J. Craig Venter Institute                                                                                                                   | J. Craig Venter Institute                                                                                                                   | Lorenzi,H., Town,C., Halpin,R., Bera,J., Ransier,A., Fedorova,N., Stockwell,T., Amedeo,P., Appalla,L., Bishop,B., Edworthy,P., Gupta,N., Hoover,J., Katzel,D., Li,K., Schobel,S., Shrivastava,S., Thovarai,V., Wang,S., Rebuffo-Scheer,C., Fan,J., He,J., Kehi,S.C., Lederboer,N., Jurgens,L.A., Bose,M.E., Beck,E.T., Kumar,S., Gerna,G., Wentworth,D.E. and Henrickson,K.J.     |
| EPI_ISL_2588669                                                                                                                                                                                                             | Key Laboratory of Emergency Detection for Public Health of Zhejiang Province, Zhejiang Provincial Centre for Disease Control and Prevention | Key Laboratory of Emergency Detection for Public Health of Zhejiang Province, Zhejiang Provincial Centre for Disease Control and Prevention | Li,C.-X., Li,W., Zhou,J., Zhang,B., Feng,Y., Xu,C.-P., Lu,Y.-Y., Holmes,E.C. and Shi,M.                                                                                                                                                                                                                                                                                           |
| EPI_ISL_2588684                                                                                                                                                                                                             | J. Craig Venter Institute                                                                                                                   | J. Craig Venter Institute                                                                                                                   | Lorenzi,H., Town,C., Halpin,R., Bera,J., Ransier,A., Fedorova,N., Stockwell,T., Amedeo,P., Appalla,L., Bishop,B., Edworthy,P., Gupta,N., Hoover,J., Katzel,D., Li,K., Schobel,S., Shrivastava,S., Thovarai,V., Wang,S., Rebuffo-Scheer,C., Fan,J., He,J., Kehi,S.C., Lederboer,N., Jurgens,L.A., Bose,M.E., Beck,E.T., Kumar,S., Gerna,G., Wentworth,D.E. and Henrickson,K.J.     |
| EPI_ISL_2588685                                                                                                                                                                                                             | J. Craig Venter Institute                                                                                                                   | J. Craig Venter Institute                                                                                                                   | Lorenzi,H., Town,C., Halpin,R., Bera,J., Ransier,A., Fedorova,N., Stockwell,T., Amedeo,P., Appalla,L., Bishop,B., Edworthy,P., Gupta,N., Hoover,J., Katzel,D., Li,K., Schobel,S., Shrivastava,S., Thovarai,V., Wang,S., Rebuffo-Scheer,C., Fan,J., He,J., Kehi,S.C., Lederboer,N., Jurgens,L.A., Bose,M.E., Beck,E.T., Kumar,S., Videla,C., Wentworth,D.E. and Henrickson,K.J.    |
| EPI_ISL_2588688                                                                                                                                                                                                             | J. Craig Venter Institute                                                                                                                   | J. Craig Venter Institute                                                                                                                   | Lorenzi,H., Town,C., Halpin,R., Bera,J., Ransier,A., Fedorova,N., Stockwell,T., Amedeo,P., Appalla,L., Bishop,B., Edworthy,P., Gupta,N., Hoover,J., Katzel,D., Schobel,S., Shrivastava,S., Thovarai,V., Wang,S., Rebuffo-Scheer,C., Fan,J., He,J., Kehi,S.C., Lederboer,N., Jurgens,L.A., Bose,M.E., Beck,E.T., Kumar,S., Neumann-Haefelin,D., Wentworth,D.E. and Henrickson,K.J. |
| EPI_ISL_2588720                                                                                                                                                                                                             | Virology Laboratory, Dr. Ricardo Gutierrez Children Hospital                                                                                | Virology Laboratory, Dr. Ricardo Gutierrez Children Hospital                                                                                | Goya,S., Valinotto,L.E., Tittarelli,E., Rojo,G.L., Greninger,A., Luso,S., Natale,M., Mistchenko,A.S. and Viegas,M.                                                                                                                                                                                                                                                                |
| EPI_ISL_2588721, EPI_ISL_2588722                                                                                                                                                                                            | Virology Laboratory, Dr. Ricardo Gutierrez Children Hospital                                                                                | Virology Laboratory, Dr. Ricardo Gutierrez Children Hospital                                                                                | Goya,S., Valinotto,L.E., Tittarelli,E., Rojo,G.L., Greninger,A., Zaiat,J., Marti,M., Mistchenko,A.S. and Viegas,M.                                                                                                                                                                                                                                                                |
| EPI_ISL_2588782                                                                                                                                                                                                             | J. Craig Venter Institute                                                                                                                   | J. Craig Venter Institute                                                                                                                   | Lorenzi,H., Town,C., Halpin,R., Bera,J., Ransier,A., Fedorova,N., Stockwell,T., Amedeo,P., Appalla,L., Bishop,B., Edworthy,P., Gupta,N., Hoover,J., Katzel,D., Li,K., Schobel,S., Shrivastava,S., Thovarai,V., Wang,S., Rebuffo-Scheer,C., Fan,J., He,J., Kehi,S.C., Lederboer,N., Jurgens,L.A., Bose,M.E., Beck,E.T., Kumar,S., Gerna,G., Wentworth,D.E. and Henrickson,K.J.     |
| EPI_ISL_2588785                                                                                                                                                                                                             | Mami Nagashima Tokyo Metropolitan Institute of Public Health, Microbiology                                                                  | Mami Nagashima Tokyo Metropolitan Institute of Public Health, Microbiology                                                                  | Hasegawa,M., Okazaki,T., Sakamoto,T., Murata,R., Nagashima,M., Shinkai,T. and Sadamasu,K.                                                                                                                                                                                                                                                                                         |
| EPI_ISL_2588794                                                                                                                                                                                                             | Virology Laboratory, Dr. Ricardo Gutierrez Children Hospital                                                                                | Virology Laboratory, Dr. Ricardo Gutierrez Children Hospital                                                                                | Goya,S., Rojo,G.L., Valinotto,L.E., Mistchenko,A.S. and Viegas,M.                                                                                                                                                                                                                                                                                                                 |

|                                                                                                                                                                                                                             |                                                                                                                                                           |                                                                                                                                                           |                                                                                                                                                                                                                                                                                               |
|-----------------------------------------------------------------------------------------------------------------------------------------------------------------------------------------------------------------------------|-----------------------------------------------------------------------------------------------------------------------------------------------------------|-----------------------------------------------------------------------------------------------------------------------------------------------------------|-----------------------------------------------------------------------------------------------------------------------------------------------------------------------------------------------------------------------------------------------------------------------------------------------|
| EPI_ISL_2588795                                                                                                                                                                                                             | Virology Laboratory, Dr. Ricardo Gutierrez Children Hospital                                                                                              | Virology Laboratory, Dr. Ricardo Gutierrez Children Hospital                                                                                              | Goya,S., Valinotto,L.E., Tittarelli,E., Rojo,G.L., Greninger,A., Zaiat,J., Marti,M., Mistchenko,A.S. and Viegas,M.                                                                                                                                                                            |
| EPI_ISL_2588796, EPI_ISL_2588818                                                                                                                                                                                            | Virology Laboratory, Dr. Ricardo Gutierrez Children Hospital                                                                                              | Virology Laboratory, Dr. Ricardo Gutierrez Children Hospital                                                                                              | Goya,S., Valinotto,L.E., Tittarelli,E., Rojo,G.L., Greninger,A., Luso,S., Natale,M., Mistchenko,A.S. and Viegas,M.                                                                                                                                                                            |
| EPI_ISL_2588827                                                                                                                                                                                                             | Virology Laboratory, Dr. Ricardo Gutierrez Children Hospital                                                                                              | Virology Laboratory, Dr. Ricardo Gutierrez Children Hospital                                                                                              | Goya,S., Valinotto,L.E., Tittarelli,E., Rojo,G.L., Greninger,A., Zaiat,J., Marti,M., Mistchenko,A.S. and Viegas,M.                                                                                                                                                                            |
| EPI_ISL_2588828                                                                                                                                                                                                             | Virology Laboratory, Dr. Ricardo Gutierrez Children Hospital                                                                                              | Virology Laboratory, Dr. Ricardo Gutierrez Children Hospital                                                                                              | Goya,S., Valinotto,L.E., Tittarelli,E., Rojo,G.L., Greninger,A., Zaiat,J., Marti,M., Mistchenko,A.S. and Viegas,M.                                                                                                                                                                            |
| EPI_ISL_2592492                                                                                                                                                                                                             | J. Craig Venter Institute                                                                                                                                 | J. Craig Venter Institute                                                                                                                                 | Goya,S., Rojo,G.L., Valinotto,L.E., Mistchenko,A.S. and Viegas,M.                                                                                                                                                                                                                             |
| EPI_ISL_2592529                                                                                                                                                                                                             | Pediatrics - Infectious Diseases, Medical College of Wisconsin                                                                                            | Pediatrics - Infectious Diseases, Medical College of Wisconsin                                                                                            | Shabman,R., Fedorova,N., Puri,V., Shrivastava,S., Amedeo,P., Isom,R., Hu,L., Pickett,B., Novotny,M., Durbin,A., Rocchi,I., Williams,T., Hall,C.B., Tesini,B.L., Schnabel,K.C., Walsh,E.E. and Caserta,M.                                                                                      |
| EPI_ISL_2592567, EPI_ISL_2592568, EPI_ISL_2592569, EPI_ISL_2592570, EPI_ISL_2592571, EPI_ISL_2592572                                                                                                                        | Broad Institute of MIT & Harvard                                                                                                                          | Broad Institute of MIT & Harvard                                                                                                                          | Rebuffo-Scheer,C., Bose,M.E., He,J., Khaja,S., Ulatowski,M., Beck,E.T., Fan,J., Kumar,S., Nelson,M.I. and Henrickson,K.J.                                                                                                                                                                     |
| EPI_ISL_2592783                                                                                                                                                                                                             | Pediatrics - Infectious Diseases, Medical College of Wisconsin                                                                                            | Pediatrics - Infectious Diseases, Medical College of Wisconsin                                                                                            | Newman,R.M., Zody,M.C., DeVincenzo,J.P., Grad,Y., Lipsitch,M., Murphy,R., Fitzgerald,M., Young,S., Gargeya,S., Poon,T.W., Charlebois,P., Weiner,B., Yang,X., Piper,M.E., McCowan,C., Ireland,A., Levin,J., Malboeuf,C., Qu,J., Chapman,S.B., Murphy,C., Wortman,J., Nusbbaum,C. and Birren,B. |
| EPI_ISL_2593173                                                                                                                                                                                                             | Virology, University of Washington                                                                                                                        | Virology, University of Washington                                                                                                                        | Rebuffo-Scheer,C., Bose,M.E., He,J., Khaja,S., Ulatowski,M., Beck,E.T., Fan,J., Kumar,S., Nelson,M.I. and Henrickson,K.J.                                                                                                                                                                     |
| EPI_ISL_2594878, EPI_ISL_2594879, EPI_ISL_2595159, EPI_ISL_2595160                                                                                                                                                          | Center for Infectious Diseases, School of Public Health, University of Texas Health Science Center                                                        | Center for Infectious Diseases, School of Public Health, University of Texas Health Science Center                                                        | Greninger,A.L., Shean,R.C. and Makhssous,N.                                                                                                                                                                                                                                                   |
| EPI_ISL_2595173                                                                                                                                                                                                             | Beijing Key Laboratory of Etiology of Viral Diseases in Children; Laboratory of Virology, Capital Institute of Pediatrics                                 | Beijing Key Laboratory of Etiology of Viral Diseases in Children; Laboratory of Virology, Capital Institute of Pediatrics                                 | Bahl,J., Hixson,J., Kim,D.-K., Qiu,X., Piedra,P.A., Piedra,F.-A., Avadhanula,V. and Machado,A.A.                                                                                                                                                                                              |
| EPI_ISL_2595181, EPI_ISL_2595182                                                                                                                                                                                            | Center for Infectious Diseases, School of Public Health, University of Texas Health Science Center                                                        | Center for Infectious Diseases, School of Public Health, University of Texas Health Science Center                                                        | Cui,G., Zhu,R., Deng,J., Zhao,L., Sun,Y., Wang,F. and Qian,Y.                                                                                                                                                                                                                                 |
| EPI_ISL_2595188, EPI_ISL_2595192, EPI_ISL_2595196, EPI_ISL_2595197, EPI_ISL_2595198, EPI_ISL_2595205                                                                                                                        | Epidemiology and Demography Department, KEMRI-Wellcome Trust Research Programme                                                                           | Epidemiology and Demography Department, KEMRI-Wellcome Trust Research Programme                                                                           | Bahl,J., Hixson,J., Kim,D.-K., Qiu,X., Piedra,P.A., Piedra,F.-A., Avadhanula,V. and Machado,A.A.                                                                                                                                                                                              |
| EPI_ISL_2595236, EPI_ISL_2595277, EPI_ISL_2595278, EPI_ISL_2595279                                                                                                                                                          | Broad Institute of MIT & Harvard                                                                                                                          | Broad Institute of MIT & Harvard                                                                                                                          | Otieno,J.R., Kamau,E.M., Oketch,J.W., Ngoi,J.M., Agoti,C.N., Gichuki,A.M., Otieno,G.P., Ngama,M., Cane,P.A., Kellam,P., Cotten,M., Lemey,P. and Nokes,D.J.                                                                                                                                    |
| EPI_ISL_2595315                                                                                                                                                                                                             | Epidemiology and Demography Department, KEMRI-Wellcome Trust Research Programme                                                                           | Epidemiology and Demography Department, KEMRI-Wellcome Trust Research Programme                                                                           | Newman,R.M., Zody,M.C., DeVincenzo,J.P., Grad,Y., Lipsitch,M., Murphy,R., Fitzgerald,M., Young,S., Gargeya,S., Poon,T.W., Charlebois,P., Weiner,B., Yang,X., Piper,M.E., McCowan,C., Ireland,A., Levin,J., Malboeuf,C., Qu,J., Chapman,S.B., Murphy,C., Wortman,J., Nusbbaum,C. and Birren,B. |
| EPI_ISL_2595321                                                                                                                                                                                                             | J. Craig Venter Institute                                                                                                                                 | J. Craig Venter Institute                                                                                                                                 | Otieno,J.R., Kamau,E.M., Oketch,J.W., Ngoi,J.M., Agoti,C.N., Gichuki,A.M., Otieno,G.P., Ngama,M., Cane,P.A., Kellam,P., Cotten,M., Lemey,P. and Nokes,D.J.                                                                                                                                    |
| EPI_ISL_2595357                                                                                                                                                                                                             | Epidemiology and Demography Department, KEMRI-Wellcome Trust Research Programme                                                                           | Epidemiology and Demography Department, KEMRI-Wellcome Trust Research Programme                                                                           | Shrivastava,S., Halpin,R.A., Puri,V., Fedorova,N.B., Stockwell,T., Amedeo,P., Katzel,D., Schobel,S., Pickett,B.E., Moore,M., Chappell,J., Larkin,E., Wentworth,D.E., Anderson,L.J. and Hartert,T.                                                                                             |
| EPI_ISL_2595477                                                                                                                                                                                                             | Marie Bashir Institute for Infectious Diseases and Biosecurity & Sydney Medical School, The University of Sydney, Westmead Institute for Medical Research | Marie Bashir Institute for Infectious Diseases and Biosecurity & Sydney Medical School, The University of Sydney, Westmead Institute for Medical Research | Otieno,J.R., Kamau,E.M., Oketch,J.W., Ngoi,J.M., Agoti,C.N., Gichuki,A.M., Otieno,G.P., Ngama,M., Cane,P.A., Kellam,P., Cotten,M., Lemey,P. and Nokes,D.J.                                                                                                                                    |
| EPI_ISL_2595540, EPI_ISL_2595541                                                                                                                                                                                            | Epidemiology and Demography Department, KEMRI-Wellcome Trust Research Programme                                                                           | Epidemiology and Demography Department, KEMRI-Wellcome Trust Research Programme                                                                           | Eden,J.-S., Kok,J., Dwyer,D.E., Fernandez,M., Carter,I. and Holmes,E.C.                                                                                                                                                                                                                       |
| EPI_ISL_2595546                                                                                                                                                                                                             | Department of Pediatrics, Center of Excellence in Clinical Virology, Chulalongkorn                                                                        | Department of Pediatrics, Center of Excellence in Clinical Virology, Chulalongkorn                                                                        | Otieno,J.R., Kamau,E.M., Oketch,J.W., Ngoi,J.M., Agoti,C.N., Gichuki,A.M., Otieno,G.P., Ngama,M., Cane,P.A., Kellam,P., Cotten,M., Lemey,P. and Nokes,D.J.                                                                                                                                    |
| EPI_ISL_2595548, EPI_ISL_2595550                                                                                                                                                                                            | Epidemiology and Demography Department, KEMRI-Wellcome Trust Research Programme                                                                           | Epidemiology and Demography Department, KEMRI-Wellcome Trust Research Programme                                                                           | Thongpan,I.                                                                                                                                                                                                                                                                                   |
| EPI_ISL_2595591, EPI_ISL_2595592, EPI_ISL_2595604                                                                                                                                                                           | Kazuya Shirato National Institute of Infectious Diseases, Virology III                                                                                    | Kazuya Shirato National Institute of Infectious Diseases, Virology III                                                                                    | Otieno,J.R., Kamau,E.M., Oketch,J.W., Ngoi,J.M., Agoti,C.N., Gichuki,A.M., Otieno,G.P., Ngama,M., Cane,P.A., Kellam,P., Cotten,M., Lemey,P. and Nokes,D.J.                                                                                                                                    |
| EPI_ISL_2595605, EPI_ISL_2595607, EPI_ISL_2595608, EPI_ISL_2595609                                                                                                                                                          | Marie Bashir Institute for Infectious Diseases and Biosecurity & Sydney Medical School, The University of Sydney, Westmead Institute for Medical Research | Marie Bashir Institute for Infectious Diseases and Biosecurity & Sydney Medical School, The University of Sydney, Westmead Institute for Medical Research | Shirato,K., Sato,K., Dapal,I., Nao,N., Omiya,S., Matsuyama,S., Takeda,M. and Nishimura,H.                                                                                                                                                                                                     |
| EPI_ISL_2595626, EPI_ISL_2595627, EPI_ISL_2595628, EPI_ISL_2595631, EPI_ISL_2595633, EPI_ISL_2595634, EPI_ISL_2595636, EPI_ISL_2595638, EPI_ISL_2595639, EPI_ISL_2595640, EPI_ISL_2595641, EPI_ISL_2595642, EPI_ISL_2595644 | Epidemiology and Demography Department, KEMRI-Wellcome Trust Research Programme                                                                           | Epidemiology and Demography Department, KEMRI-Wellcome Trust Research Programme                                                                           | Eden,J.-S., Kok,J., Dwyer,D.E., Fernandez,M., Carter,I. and Holmes,E.C.                                                                                                                                                                                                                       |
| EPI_ISL_2595651                                                                                                                                                                                                             | Lab Medicine, UW                                                                                                                                          | Lab Medicine, UW                                                                                                                                          | Otieno,J.R., Kamau,E.M., Oketch,J.W., Ngoi,J.M., Agoti,C.N., Gichuki,A.M., Otieno,G.P., Ngama,M., Cane,P.A., Kellam,P., Cotten,M., Lemey,P. and Nokes,D.J.                                                                                                                                    |
| EPI_ISL_2595653, EPI_ISL_2595654, EPI_ISL_2595655, EPI_ISL_2595657, EPI_ISL_2595658, EPI_ISL_2595660, EPI_ISL_2595661, EPI_ISL_2595663, EPI_ISL_2595665, EPI_ISL_2595667, EPI_ISL_2595673                                   | Lab Medicine, UW                                                                                                                                          | Lab Medicine, UW                                                                                                                                          | Greninger,A.L., Makhssous,N., Kuyppers,J.M., Shean,R.C. and Jerome,K.R.                                                                                                                                                                                                                       |
| EPI_ISL_2595681, EPI_ISL_2595684                                                                                                                                                                                            | Epidemiology and Demography Department, KEMRI-Wellcome Trust Research Programme                                                                           | Epidemiology and Demography Department, KEMRI-Wellcome Trust Research Programme                                                                           | Otieno,J.R., Kamau,E.M., Oketch,J.W., Ngoi,J.M., Agoti,C.N., Gichuki,A.M., Otieno,G.P., Ngama,M., Cane,P.A., Kellam,P., Cotten,M., Lemey,P. and Nokes,D.J.                                                                                                                                    |
| EPI_ISL_2595691                                                                                                                                                                                                             | Marie Bashir Institute for Infectious Diseases and Biosecurity & Sydney Medical School, The University of Sydney, Westmead Institute for Medical Research | Marie Bashir Institute for Infectious Diseases and Biosecurity & Sydney Medical School, The University of Sydney, Westmead Institute for Medical Research | Eden,J.-S., Kok,J., Dwyer,D.E., Fernandez,M., Carter,I. and Holmes,E.C.                                                                                                                                                                                                                       |
| EPI_ISL_2595696                                                                                                                                                                                                             | J. Craig Venter Institute                                                                                                                                 | J. Craig Venter Institute                                                                                                                                 | Tan,G., Pickett,B., Fedorova,N., Amedeo,P., Hu,L., Christensen,J., Miller,J., Durbin,A., Williams,T., Arumemi,F., Cadiz,C., Alanis,R., Balmeseda,A., Williams,T., Schiller,A., Patel,M., Kubale,J. and Gordon,A.                                                                              |
| EPI_ISL_2595697                                                                                                                                                                                                             | Pediatrics, University of New Mexico                                                                                                                      | Pediatrics, University of New Mexico                                                                                                                      | Kothari,A., Kennedy,J.L., Schwalm,K.C., Putt,C., Denson,J.L. and Dinwiddie,D.L.                                                                                                                                                                                                               |
| EPI_ISL_2595699, EPI_ISL_2595700, EPI_ISL_2595701                                                                                                                                                                           | Epidemiology and Demography Department, KEMRI-Wellcome Trust Research Programme                                                                           | Epidemiology and Demography Department, KEMRI-Wellcome Trust Research Programme                                                                           | Otieno,J.R., Kamau,E.M., Oketch,J.W., Ngoi,J.M., Agoti,C.N., Gichuki,A.M., Otieno,G.P., Ngama,M., Cane,P.A., Kellam,P., Cotten,M., Lemey,P. and Nokes,D.J.                                                                                                                                    |
| EPI_ISL_2595702                                                                                                                                                                                                             | Pediatrics, University of New Mexico                                                                                                                      | Pediatrics, University of New Mexico                                                                                                                      | Kothari,A., Kennedy,J.L., Schwalm,K.C., Putt,C., Denson,J.L. and Dinwiddie,D.L.                                                                                                                                                                                                               |
| EPI_ISL_2595703, EPI_ISL_2595704, EPI_ISL_2595705                                                                                                                                                                           | Epidemiology and Demography Department, KEMRI-Wellcome Trust Research Programme                                                                           | Epidemiology and Demography Department, KEMRI-Wellcome Trust Research Programme                                                                           | Otieno,J.R., Kamau,E.M., Oketch,J.W., Ngoi,J.M., Agoti,C.N., Gichuki,A.M., Otieno,G.P., Ngama,M., Cane,P.A., Kellam,P., Cotten,M., Lemey,P. and Nokes,D.J.                                                                                                                                    |
| EPI_ISL_2595707, EPI_ISL_2595708, EPI_ISL_2595709, EPI_ISL_2595710, EPI_ISL_2595711, EPI_ISL_2595712                                                                                                                        | Pediatrics, University of New Mexico                                                                                                                      | Pediatrics, University of New Mexico                                                                                                                      | Kothari,A., Kennedy,J.L., Schwalm,K.C., Putt,C., Denson,J.L. and Dinwiddie,D.L.                                                                                                                                                                                                               |
| EPI_ISL_2595713                                                                                                                                                                                                             | Marie Bashir Institute for Infectious Diseases and Biosecurity & Sydney Medical School, The University of Sydney, Westmead Institute for Medical Research | Marie Bashir Institute for Infectious Diseases and Biosecurity & Sydney Medical School, The University of Sydney, Westmead Institute for Medical Research | Eden,J.-S., Kok,J., Dwyer,D.E., Fernandez,M., Carter,I. and Holmes,E.C.                                                                                                                                                                                                                       |
|                                                                                                                                                                                                                             | Department of Pediatrics, Center of Excellence in Clinical                                                                                                | Department of Pediatrics, Center of Excellence in Clinical                                                                                                | Thongpan,I.                                                                                                                                                                                                                                                                                   |

|                                                                                                                                                                                                                                                                                                                                                                                                                                                                                                             |                                                                                                                                                                                      |                                                                                                                                                                                      |                                                                                                                                                                                                                 |
|-------------------------------------------------------------------------------------------------------------------------------------------------------------------------------------------------------------------------------------------------------------------------------------------------------------------------------------------------------------------------------------------------------------------------------------------------------------------------------------------------------------|--------------------------------------------------------------------------------------------------------------------------------------------------------------------------------------|--------------------------------------------------------------------------------------------------------------------------------------------------------------------------------------|-----------------------------------------------------------------------------------------------------------------------------------------------------------------------------------------------------------------|
| EPI_ISL_2595714, EPI_ISL_2595715, EPI_ISL_2595716                                                                                                                                                                                                                                                                                                                                                                                                                                                           | Virology, Chulalongkorn<br>Marie Bashir Institute for Infectious Diseases and Biosecurity & Sydney Medical School, The University of Sydney, Westmead Institute for Medical Research | Virology, Chulalongkorn<br>Marie Bashir Institute for Infectious Diseases and Biosecurity & Sydney Medical School, The University of Sydney, Westmead Institute for Medical Research | Eden,J.-S., Kok,J., Dwyer,D.E., Fernandez,M., Carter,I. and Holmes,E.C.                                                                                                                                         |
| EPI_ISL_2595717                                                                                                                                                                                                                                                                                                                                                                                                                                                                                             | J. Craig Venter Institute                                                                                                                                                            | J. Craig Venter Institute                                                                                                                                                            | Tan,G., Pickett,B., Fedorova,N., Amedeo,P., Hu,L., Christensen,J., Miller,J., Durbin,A., Williams,T., Arumemi,F., Cadiz,C., Alanis,R., Balmseda,A., Williams,T., Schiller,A., Patel,M., Kubale,J. and Gordon,A. |
| EPI_ISL_2595718, EPI_ISL_2595719                                                                                                                                                                                                                                                                                                                                                                                                                                                                            | Marie Bashir Institute for Infectious Diseases and Biosecurity & Sydney Medical School, The University of Sydney, Westmead Institute for Medical Research                            | Marie Bashir Institute for Infectious Diseases and Biosecurity & Sydney Medical School, The University of Sydney, Westmead Institute for Medical Research                            | Eden,J.-S., Kok,J., Dwyer,D.E., Fernandez,M., Carter,I. and Holmes,E.C.                                                                                                                                         |
| EPI_ISL_2595722                                                                                                                                                                                                                                                                                                                                                                                                                                                                                             | Department of Pediatrics, Center of Excellence in Clinical Virology, Chulalongkorn                                                                                                   | Department of Pediatrics, Center of Excellence in Clinical Virology, Chulalongkorn                                                                                                   | Thongpan,I.                                                                                                                                                                                                     |
| EPI_ISL_2595723                                                                                                                                                                                                                                                                                                                                                                                                                                                                                             | Gansu Center for Disease Control and Prevention, Pathogen Laboratory                                                                                                                 | Gansu Center for Disease Control and Prevention, Pathogen Laboratory                                                                                                                 | Qiao,R., Chen,J., Wu,H. and Yu,D.                                                                                                                                                                               |
| EPI_ISL_2595724                                                                                                                                                                                                                                                                                                                                                                                                                                                                                             | Laboratory Medicine, UW Virology                                                                                                                                                     | Laboratory Medicine, UW Virology                                                                                                                                                     | Lin,M.J., Tait,A. and Greninger,A.L.                                                                                                                                                                            |
| EPI_ISL_2811729                                                                                                                                                                                                                                                                                                                                                                                                                                                                                             | Royal Children's Hospital                                                                                                                                                            | WHO Collaborating Centre for Reference and Research on Influenza                                                                                                                     | Jean Moselen, Annette Alafaci, Yi-Mo Deng, Ammar Aziz, Naomi Komadina                                                                                                                                           |
| EPI_ISL_2835616                                                                                                                                                                                                                                                                                                                                                                                                                                                                                             | PathWest Laboratory Medicine WA Microbial Surveillance Unit                                                                                                                          | PathWest Laboratory Medicine WA Microbial Surveillance Unit                                                                                                                          | Chisha Sikazwe, Avram Levy, David Smith, Chris Blyth, Alice Michie, Cara Minney-Smith, David Speers                                                                                                             |
| EPI_ISL_2839170, EPI_ISL_2839171, EPI_ISL_2839172, EPI_ISL_2839173, EPI_ISL_2839176, EPI_ISL_2839177                                                                                                                                                                                                                                                                                                                                                                                                        | PathWest Laboratory Medicine WA Microbial Surveillance Unit                                                                                                                          | PathWest Laboratory Medicine WA Microbial Surveillance Unit                                                                                                                          | "Chisha Sikazwe, Avram Levy, David Smith, Chris Blyth, Alice Michie, Cara Minney-Smith, David Speers"                                                                                                           |
| EPI_ISL_2839185, EPI_ISL_2839186, EPI_ISL_2839187, EPI_ISL_2839188, EPI_ISL_2839189                                                                                                                                                                                                                                                                                                                                                                                                                         | Centre for Infectious Diseases and Microbiology Laboratory Services                                                                                                                  | Centre for Infectious Diseases and Microbiology Laboratory Services                                                                                                                  | "John-Sebastian Eden, Jen Kok, Dominic Dwyer, Edward Holmes, Philip Britton, Alison Kesson, Elena Cutmore, Rachel Tulloch, Bethany Horsburgh"                                                                   |
| EPI_ISL_2839190                                                                                                                                                                                                                                                                                                                                                                                                                                                                                             | Departments of Clinical Microbiology and Infectious Diseases                                                                                                                         | Centre for Infectious Diseases and Microbiology Laboratory Services                                                                                                                  | "John-Sebastian Eden, Jen Kok, Dominic Dwyer, Edward Holmes, Philip Britton, Alison Kesson, Elena Cutmore, Rachel Tulloch, Bethany Horsburgh"                                                                   |
| EPI_ISL_2839196                                                                                                                                                                                                                                                                                                                                                                                                                                                                                             | Centre for Infectious Diseases and Microbiology Laboratory Services                                                                                                                  | Centre for Infectious Diseases and Microbiology Laboratory Services                                                                                                                  | "John-Sebastian Eden, Jen Kok, Dominic Dwyer, Edward Holmes, Philip Britton, Alison Kesson, Elena Cutmore, Rachel Tulloch, Bethany Horsburgh"                                                                   |
| EPI_ISL_2839197                                                                                                                                                                                                                                                                                                                                                                                                                                                                                             | Departments of Clinical Microbiology and Infectious Diseases                                                                                                                         | Centre for Infectious Diseases and Microbiology Laboratory Services                                                                                                                  | "John-Sebastian Eden, Jen Kok, Dominic Dwyer, Edward Holmes, Philip Britton, Alison Kesson, Elena Cutmore, Rachel Tulloch, Bethany Horsburgh"                                                                   |
| EPI_ISL_2839198                                                                                                                                                                                                                                                                                                                                                                                                                                                                                             | Centre for Infectious Diseases and Microbiology Laboratory Services                                                                                                                  | Centre for Infectious Diseases and Microbiology Laboratory Services                                                                                                                  | "John-Sebastian Eden, Jen Kok, Dominic Dwyer, Edward Holmes, Philip Britton, Alison Kesson, Elena Cutmore, Rachel Tulloch, Bethany Horsburgh"                                                                   |
| EPI_ISL_2839199                                                                                                                                                                                                                                                                                                                                                                                                                                                                                             | PathWest Laboratory Medicine WA Microbial Surveillance Unit                                                                                                                          | PathWest Laboratory Medicine WA Microbial Surveillance Unit                                                                                                                          | "Chisha Sikazwe, Avram Levy, David Smith, Chris Blyth, Alice Michie, Cara Minney-Smith, David Speers"                                                                                                           |
| EPI_ISL_2839201, EPI_ISL_2839202, EPI_ISL_2839203, EPI_ISL_2839204, EPI_ISL_2839205, EPI_ISL_2839206, EPI_ISL_2839207, EPI_ISL_2839208, EPI_ISL_2839209, EPI_ISL_2839210, EPI_ISL_2839211                                                                                                                                                                                                                                                                                                                   | Centre for Infectious Diseases and Microbiology Laboratory Services                                                                                                                  | Centre for Infectious Diseases and Microbiology Laboratory Services                                                                                                                  | "John-Sebastian Eden, Jen Kok, Dominic Dwyer, Edward Holmes, Philip Britton, Alison Kesson, Elena Cutmore, Rachel Tulloch, Bethany Horsburgh"                                                                   |
| EPI_ISL_2839213, EPI_ISL_2839214, EPI_ISL_2839215, EPI_ISL_2839216, EPI_ISL_2839217, EPI_ISL_2839218                                                                                                                                                                                                                                                                                                                                                                                                        | Departments of Clinical Microbiology and Infectious Diseases                                                                                                                         | Centre for Infectious Diseases and Microbiology Laboratory Services                                                                                                                  | "John-Sebastian Eden, Jen Kok, Dominic Dwyer, Edward Holmes, Philip Britton, Alison Kesson, Elena Cutmore, Rachel Tulloch, Bethany Horsburgh"                                                                   |
| EPI_ISL_2839219, EPI_ISL_2839220, EPI_ISL_2839221, EPI_ISL_2839222, EPI_ISL_2839223, EPI_ISL_2839224, EPI_ISL_2839225                                                                                                                                                                                                                                                                                                                                                                                       | Centre for Infectious Diseases and Microbiology Laboratory Services                                                                                                                  | Centre for Infectious Diseases and Microbiology Laboratory Services                                                                                                                  | "John-Sebastian Eden, Jen Kok, Dominic Dwyer, Edward Holmes, Philip Britton, Alison Kesson, Elena Cutmore, Rachel Tulloch, Bethany Horsburgh"                                                                   |
| EPI_ISL_2839227, EPI_ISL_2839228, EPI_ISL_2839229, EPI_ISL_2839230, EPI_ISL_2839231, EPI_ISL_2839232, EPI_ISL_2839233, EPI_ISL_2839234                                                                                                                                                                                                                                                                                                                                                                      | Departments of Clinical Microbiology and Infectious Diseases                                                                                                                         | Centre for Infectious Diseases and Microbiology Laboratory Services                                                                                                                  | "John-Sebastian Eden, Jen Kok, Dominic Dwyer, Edward Holmes, Philip Britton, Alison Kesson, Elena Cutmore, Rachel Tulloch, Bethany Horsburgh"                                                                   |
| EPI_ISL_2839235, EPI_ISL_2839236, EPI_ISL_2839237, EPI_ISL_2839239, EPI_ISL_2839242, EPI_ISL_2839244, EPI_ISL_2839246, EPI_ISL_2839248, EPI_ISL_2839250, EPI_ISL_2839252, EPI_ISL_2839254, EPI_ISL_2839256, EPI_ISL_2839258, EPI_ISL_2839260, EPI_ISL_2839262, EPI_ISL_2839264, EPI_ISL_2839266, EPI_ISL_2839269, EPI_ISL_2839271, EPI_ISL_2839273, EPI_ISL_2839275, EPI_ISL_2839277, EPI_ISL_2839279, EPI_ISL_2839281, EPI_ISL_2839283, EPI_ISL_2839285, EPI_ISL_2839288, EPI_ISL_2839290, EPI_ISL_2839292 | Centre for Infectious Diseases and Microbiology Laboratory Services                                                                                                                  | Centre for Infectious Diseases and Microbiology Laboratory Services                                                                                                                  | "John-Sebastian Eden, Jen Kok, Dominic Dwyer, Edward Holmes, Philip Britton, Alison Kesson, Elena Cutmore, Rachel Tulloch, Bethany Horsburgh"                                                                   |
| EPI_ISL_2839294, EPI_ISL_2839296, EPI_ISL_2839298, EPI_ISL_2839300, EPI_ISL_2839302, EPI_ISL_2839304, EPI_ISL_2839306, EPI_ISL_2839308, EPI_ISL_2839310, EPI_ISL_2839312                                                                                                                                                                                                                                                                                                                                    | Departments of Clinical Microbiology and Infectious Diseases                                                                                                                         | Centre for Infectious Diseases and Microbiology Laboratory Services                                                                                                                  | "John-Sebastian Eden, Jen Kok, Dominic Dwyer, Edward Holmes, Philip Britton, Alison Kesson, Elena Cutmore, Rachel Tulloch, Bethany Horsburgh"                                                                   |
| EPI_ISL_2839313, EPI_ISL_2839316, EPI_ISL_2839318, EPI_ISL_2839320, EPI_ISL_2839322, EPI_ISL_2839324, EPI_ISL_2839326, EPI_ISL_2839328, EPI_ISL_2839330, EPI_ISL_2839332, EPI_ISL_2839334, EPI_ISL_2839337, EPI_ISL_2839339, EPI_ISL_2839341, EPI_ISL_2839343, EPI_ISL_2839345, EPI_ISL_2839347, EPI_ISL_2839349                                                                                                                                                                                            | Centre for Infectious Diseases and Microbiology Laboratory Services                                                                                                                  | Centre for Infectious Diseases and Microbiology Laboratory Services                                                                                                                  | "John-Sebastian Eden, Jen Kok, Dominic Dwyer, Edward Holmes, Philip Britton, Alison Kesson, Elena Cutmore, Rachel Tulloch, Bethany Horsburgh"                                                                   |
| EPI_ISL_2839351, EPI_ISL_2839354, EPI_ISL_2839356                                                                                                                                                                                                                                                                                                                                                                                                                                                           | Departments of Clinical Microbiology and Infectious Diseases                                                                                                                         | Centre for Infectious Diseases and Microbiology Laboratory Services                                                                                                                  | "John-Sebastian Eden, Jen Kok, Dominic Dwyer, Edward Holmes, Philip Britton, Alison Kesson, Elena Cutmore, Rachel Tulloch, Bethany Horsburgh"                                                                   |
| EPI_ISL_2839358, EPI_ISL_2839360, EPI_ISL_2839362                                                                                                                                                                                                                                                                                                                                                                                                                                                           | Centre for Infectious Diseases and Microbiology Laboratory Services                                                                                                                  | Centre for Infectious Diseases and Microbiology Laboratory Services                                                                                                                  | "John-Sebastian Eden, Jen Kok, Dominic Dwyer, Edward Holmes, Philip Britton, Alison Kesson, Elena Cutmore, Rachel Tulloch, Bethany Horsburgh"                                                                   |
| EPI_ISL_2839364                                                                                                                                                                                                                                                                                                                                                                                                                                                                                             | PathWest Laboratory Medicine WA Microbial Surveillance Unit                                                                                                                          | PathWest Laboratory Medicine WA Microbial Surveillance Unit                                                                                                                          | "Chisha Sikazwe, Avram Levy, David Smith, Chris Blyth, Alice Michie, Cara Minney-Smith, David Speers"                                                                                                           |
| EPI_ISL_2839366, EPI_ISL_2839368                                                                                                                                                                                                                                                                                                                                                                                                                                                                            | Centre for Infectious Diseases and Microbiology Laboratory Services                                                                                                                  | Centre for Infectious Diseases and Microbiology Laboratory Services                                                                                                                  | "John-Sebastian Eden, Jen Kok, Dominic Dwyer, Edward Holmes, Philip Britton, Alison Kesson, Elena Cutmore, Rachel Tulloch, Bethany Horsburgh"                                                                   |
| EPI_ISL_2839372                                                                                                                                                                                                                                                                                                                                                                                                                                                                                             | PathWest Laboratory Medicine WA Microbial Surveillance Unit                                                                                                                          | PathWest Laboratory Medicine WA Microbial Surveillance Unit                                                                                                                          | "Chisha Sikazwe, Avram Levy, David Smith, Chris Blyth, Alice Michie, Cara Minney-Smith, David Speers"                                                                                                           |
| EPI_ISL_2839374                                                                                                                                                                                                                                                                                                                                                                                                                                                                                             | Centre for Infectious Diseases and Microbiology Laboratory Services                                                                                                                  | Centre for Infectious Diseases and Microbiology Laboratory Services                                                                                                                  | "John-Sebastian Eden, Jen Kok, Dominic Dwyer, Edward Holmes, Philip Britton, Alison Kesson, Elena Cutmore, Rachel Tulloch, Bethany Horsburgh"                                                                   |
| EPI_ISL_2839376, EPI_ISL_2839397, EPI_ISL_2839398, EPI_ISL_2839399, EPI_ISL_2839400, EPI_ISL_2839401, EPI_ISL_2839402, EPI_ISL_2839403, EPI_ISL_2839404, EPI_ISL_2839405, EPI_ISL_2839406, EPI_ISL_2839407, EPI_ISL_2839408, EPI_ISL_2839409, EPI_ISL_2839410, EPI_ISL_2839411, EPI_ISL_2839412, EPI_ISL_2839413, EPI_ISL_2839414, EPI_ISL_2839415                                                                                                                                                          |                                                                                                                                                                                      |                                                                                                                                                                                      |                                                                                                                                                                                                                 |

|                                                                                                      |                                                                                                                                                                                                                                                                                                                                                                                                                                                                                                                                                                |                                                                                                    |                                                                                                                                                                                                                                 |
|------------------------------------------------------------------------------------------------------|----------------------------------------------------------------------------------------------------------------------------------------------------------------------------------------------------------------------------------------------------------------------------------------------------------------------------------------------------------------------------------------------------------------------------------------------------------------------------------------------------------------------------------------------------------------|----------------------------------------------------------------------------------------------------|---------------------------------------------------------------------------------------------------------------------------------------------------------------------------------------------------------------------------------|
| see above                                                                                            | PathWest Laboratory Medicine WA Microbial Surveillance Unit                                                                                                                                                                                                                                                                                                                                                                                                                                                                                                    | PathWest Laboratory Medicine WA Microbial Surveillance Unit                                        | "Chisha Sikazwe, Avram Levy, David Smith, Chris Blyth, Alice Michie, Cara Minney-Smith, David Speers"                                                                                                                           |
| EPI_ISL_2839416, EPI_ISL_2839417                                                                     | Centre for Infectious Diseases and Microbiology Laboratory Services                                                                                                                                                                                                                                                                                                                                                                                                                                                                                            | Centre for Infectious Diseases and Microbiology Laboratory Services                                | "John-Sebastian Eden, Jen Kok, Dominic Dwyer, Edward Holmes, Philip Britton, Alison Kesson, Elena Cutmore, Rachel Tulloch, Bethany Horsburgh"                                                                                   |
| EPI_ISL_2839418, EPI_ISL_2839438, EPI_ISL_2839439, EPI_ISL_2839440, EPI_ISL_2839441, EPI_ISL_2839442 | PathWest Laboratory Medicine WA Microbial Surveillance Unit                                                                                                                                                                                                                                                                                                                                                                                                                                                                                                    | PathWest Laboratory Medicine WA Microbial Surveillance Unit                                        | "Chisha Sikazwe, Avram Levy, David Smith, Chris Blyth, Alice Michie, Cara Minney-Smith, David Speers"                                                                                                                           |
| EPI_ISL_2839443, EPI_ISL_2839444, EPI_ISL_2839445, EPI_ISL_2839446, EPI_ISL_2839447, EPI_ISL_2839448 | Centre for Infectious Diseases and Microbiology Laboratory Services                                                                                                                                                                                                                                                                                                                                                                                                                                                                                            | Centre for Infectious Diseases and Microbiology Laboratory Services                                | "John-Sebastian Eden, Jen Kok, Dominic Dwyer, Edward Holmes, Philip Britton, Alison Kesson, Elena Cutmore, Rachel Tulloch, Bethany Horsburgh"                                                                                   |
| EPI_ISL_2839449                                                                                      | Departments of Clinical Microbiology and Infectious Diseases                                                                                                                                                                                                                                                                                                                                                                                                                                                                                                   | Centre for Infectious Diseases and Microbiology Laboratory Services                                | "John-Sebastian Eden, Jen Kok, Dominic Dwyer, Edward Holmes, Philip Britton, Alison Kesson, Elena Cutmore, Rachel Tulloch, Bethany Horsburgh"                                                                                   |
| EPI_ISL_2839450                                                                                      | Centre for Infectious Diseases and Microbiology Laboratory Services                                                                                                                                                                                                                                                                                                                                                                                                                                                                                            | Centre for Infectious Diseases and Microbiology Laboratory Services                                | "John-Sebastian Eden, Jen Kok, Dominic Dwyer, Edward Holmes, Philip Britton, Alison Kesson, Elena Cutmore, Rachel Tulloch, Bethany Horsburgh"                                                                                   |
| EPI_ISL_2839452                                                                                      | PathWest Laboratory Medicine WA Microbial Surveillance Unit                                                                                                                                                                                                                                                                                                                                                                                                                                                                                                    | PathWest Laboratory Medicine WA Microbial Surveillance Unit                                        | "Chisha Sikazwe, Avram Levy, David Smith, Chris Blyth, Alice Michie, Cara Minney-Smith, David Speers"                                                                                                                           |
| EPI_ISL_2839453                                                                                      | Centre for Infectious Diseases and Microbiology Laboratory Services                                                                                                                                                                                                                                                                                                                                                                                                                                                                                            | Centre for Infectious Diseases and Microbiology Laboratory Services                                | "John-Sebastian Eden, Jen Kok, Dominic Dwyer, Edward Holmes, Philip Britton, Alison Kesson, Elena Cutmore, Rachel Tulloch, Bethany Horsburgh"                                                                                   |
| EPI_ISL_2839454                                                                                      | Departments of Clinical Microbiology and Infectious Diseases                                                                                                                                                                                                                                                                                                                                                                                                                                                                                                   | Centre for Infectious Diseases and Microbiology Laboratory Services                                | "John-Sebastian Eden, Jen Kok, Dominic Dwyer, Edward Holmes, Philip Britton, Alison Kesson, Elena Cutmore, Rachel Tulloch, Bethany Horsburgh"                                                                                   |
| EPI_ISL_2839455, EPI_ISL_2839456                                                                     | Centre for Infectious Diseases and Microbiology Laboratory Services                                                                                                                                                                                                                                                                                                                                                                                                                                                                                            | Centre for Infectious Diseases and Microbiology Laboratory Services                                | "John-Sebastian Eden, Jen Kok, Dominic Dwyer, Edward Holmes, Philip Britton, Alison Kesson, Elena Cutmore, Rachel Tulloch, Bethany Horsburgh"                                                                                   |
| EPI_ISL_2839457                                                                                      | Monash Medical Centre                                                                                                                                                                                                                                                                                                                                                                                                                                                                                                                                          | WHO Collaborating Centre for Reference and Research on Influenza                                   | Xiaomin Dong, Michelle Francis, Tony Korman, Yi-Mo Deng, Ammar Aziz, Naomi Komadina                                                                                                                                             |
| EPI_ISL_2989613                                                                                      | Royal Children's Hospital                                                                                                                                                                                                                                                                                                                                                                                                                                                                                                                                      | WHO Collaborating Centre for Reference and Research on Influenza                                   | Xiaomin Dong, Annette Alafaci, Yi-Mo Deng, Ammar Aziz, Naomi Komadina                                                                                                                                                           |
| EPI_ISL_2989828                                                                                      | PathWest Laboratory Medicine WA Microbial Surveillance Unit                                                                                                                                                                                                                                                                                                                                                                                                                                                                                                    | PathWest Laboratory Medicine WA Microbial Surveillance Unit                                        | Chisha Sikazwe, Avram Levy, David Smith, Chris Blyth, Alice Michie, Cara Minney-Smith, David Speers                                                                                                                             |
| EPI_ISL_2991498                                                                                      | Centro de Salud Sócrates Flores Vivas                                                                                                                                                                                                                                                                                                                                                                                                                                                                                                                          | University of Edinburgh                                                                            | Gordon, A., Alanis, R., Balmaseda, A., Schiller, A., Patel, M., Kubale, J., Tan, G., Pickett, B., Fedorova, N., Amedeo, P., Hu, L., Christensen, J., Miller, J., Durbin, A., Williams, T., Arumemi, F., Cadiz, C., Williams, T. |
| EPI_ISL_412458                                                                                       | Virology Laboratory, Ricardo Gutiérrez Children's Hospital                                                                                                                                                                                                                                                                                                                                                                                                                                                                                                     | Virology Laboratory, Ricardo Gutiérrez Children's Hospital / Vanderbilt University Medical Center  | Goya, Stephanie; Lucion, Maria Florencia; Juarez, Maria del Valle; Shilts, Meghan; Gentile, Angela; Mistchenko, Alicia S.; Das, Suman & Viegas, Mariana                                                                         |
| EPI_ISL_412460, EPI_ISL_412461                                                                       | Virology Laboratory Ricardo Gutiérrez Children's Hospital                                                                                                                                                                                                                                                                                                                                                                                                                                                                                                      | Virology Laboratory Ricardo Gutiérrez Children's Hospital                                          | Goya, Stephanie.; Nabaes Jodar, Mercedes S.; Valinotto, Laura E.; Rojo, Gabriel L.; Zaiat, Jonathan; Marti, Marcelo A.; Mistchenko, Alicia S.; Viegas, M.                                                                       |
| EPI_ISL_412643                                                                                       | Virology Laboratory, Ricardo Gutiérrez Children's Hospital                                                                                                                                                                                                                                                                                                                                                                                                                                                                                                     | Virology Laboratory, Ricardo Gutiérrez Children's Hospital / Vanderbilt University Medical Center  | Goya, Stephanie; Lucion, Maria Florencia; Juarez, Maria del Valle; Shilts, Meghan; Gentile, Angela; Mistchenko, Alicia S.; Das, Suman & Viegas, Mariana                                                                         |
| EPI_ISL_412857, EPI_ISL_412858                                                                       | WHO National Influenza Centre Russian Federation                                                                                                                                                                                                                                                                                                                                                                                                                                                                                                               | WHO National Influenza Centre Russian Federation                                                   | Komissarova K., Fadeev A., Komissarov A., Krivitskaya V.                                                                                                                                                                        |
| EPI_ISL_412859                                                                                       | Virology Laboratory, Ricardo Gutiérrez Children's Hospital                                                                                                                                                                                                                                                                                                                                                                                                                                                                                                     | Virology Laboratory, Ricardo Gutiérrez Children's Hospital / Vanderbilt University Medical Center  | Goya, Stephanie; Lucion, Maria Florencia; Juarez, Maria del Valle; Shilts, Meghan; Gentile, Angela; Mistchenko, Alicia S.; Das, Suman & Viegas, Mariana                                                                         |
| EPI_ISL_412863                                                                                       | Virology Laboratory, Ricardo Gutiérrez Children's Hospital.                                                                                                                                                                                                                                                                                                                                                                                                                                                                                                    | Virology Laboratory, Ricardo Gutiérrez Children's Hospital / Vanderbilt University Medical Center. | Goya, Stephanie; Lucion, Maria Florencia; Juarez, Maria del Valle; Shilts, Meghan; Gentile, Angela; Mistchenko, Alicia S.; Das, Suman & Viegas, Mariana                                                                         |
| EPI_ISL_412864                                                                                       | Respiratory Virus Unit, Microbiology Services Colindale, Public Health England                                                                                                                                                                                                                                                                                                                                                                                                                                                                                 | Microbiology Services Colindale, Public Health England                                             | Zambon M                                                                                                                                                                                                                        |
| EPI_ISL_412865                                                                                       | Respiratory Virus Unit, Microbiology Services Colindale, Public Health England                                                                                                                                                                                                                                                                                                                                                                                                                                                                                 | Microbiology Services Colindale, Public Health England                                             | Zambon M.                                                                                                                                                                                                                       |
| EPI_ISL_412866                                                                                       | Respiratory Virus Unit, Microbiology Services Colindale, Public Health England                                                                                                                                                                                                                                                                                                                                                                                                                                                                                 | Microbiology Services Colindale, Public Health England                                             | Zambon M                                                                                                                                                                                                                        |
| EPI_ISL_412867, EPI_ISL_412868                                                                       | Institut Pasteur de Madagascar                                                                                                                                                                                                                                                                                                                                                                                                                                                                                                                                 | Institut Pasteur de Madagascar                                                                     | Jean-Michel HERAUD                                                                                                                                                                                                              |
| EPI_ISL_413222, EPI_ISL_413293, EPI_ISL_413352, EPI_ISL_413353                                       | VIC, Victorian Infectious Diseases Reference Laboratory                                                                                                                                                                                                                                                                                                                                                                                                                                                                                                        | WHO Collaborating Centre for Reference and Research on Influenza                                   | Xiaomin Dong, Annette Alafaci, Yi-Mo Deng, Ammar Aziz, Naomi Komadina                                                                                                                                                           |
| EPI_ISL_4569432, EPI_ISL_4602779                                                                     | EPI_ISL_732337, EPI_ISL_732338, EPI_ISL_732340, EPI_ISL_732341, EPI_ISL_732342, EPI_ISL_732343, EPI_ISL_732344, EPI_ISL_732345, EPI_ISL_732346, EPI_ISL_732347, EPI_ISL_732348, EPI_ISL_732349, EPI_ISL_732350, EPI_ISL_732351, EPI_ISL_732352, EPI_ISL_732353, EPI_ISL_732354, EPI_ISL_732355, EPI_ISL_732356, EPI_ISL_732358, EPI_ISL_732359, EPI_ISL_732360, EPI_ISL_732361, EPI_ISL_732362, EPI_ISL_732363, EPI_ISL_732364, EPI_ISL_732365, EPI_ISL_732366, EPI_ISL_732367, EPI_ISL_732368, EPI_ISL_732369, EPI_ISL_732371, EPI_ISL_732372, EPI_ISL_732373 | National Infection Service, Public Health England                                                  | Zambon M, Talts T, Ellis J, Miah S, Platt S                                                                                                                                                                                     |
| see above                                                                                            | Respiratory Virus Unit, National Infection Service, Public Health England                                                                                                                                                                                                                                                                                                                                                                                                                                                                                      | National Infection Service, Public Health England                                                  | Zambon M, Talts T, Ellis J, Miah S, Platt S                                                                                                                                                                                     |
